1 **Unique morphogenetic signatures define**

2 **mammalian neck muscles and associated connective tissues**

3  
4  
5 Eglantine Heude<sup>1,2</sup>, Marketa Tesarova<sup>3</sup>, Elizabeth M. Sefton<sup>4</sup>, Estelle Jullian<sup>5</sup>, Noritaka Adachi<sup>5</sup>,  
6 Alexandre Grimaldi<sup>1,2</sup>, Tomas Zikmund<sup>3</sup>, Jozef Kaiser<sup>3</sup>, Gabrielle Kardon<sup>4</sup>, Robert G. Kelly<sup>5</sup> and  
7 Shahragim Tajbakhsh<sup>1,2</sup>

8  
9 <sup>1</sup> Department of Developmental & Stem Cell Biology, Institut Pasteur, France

10 <sup>2</sup> CNRS UMR 3738, Paris, France

11 <sup>3</sup> Central European Institute of Technology, Brno University of Technology, Czech Republic

12 <sup>4</sup> Department of Human Genetics, University of Utah, Salt Lake City, USA

13 <sup>5</sup> Aix-Marseille Université, CNRS UMR 7288, IBDM, Marseille, France

14  
15 \* To whom correspondence should be addressed:

16 Dr. Shahragim Tajbakhsh

17 Department of Developmental & Stem Cell Biology, CNRS UMR 3738

18 Institut Pasteur

19 25, rue du Dr. Roux

20 75015 Paris, France

21  
22 email: [shahragim.tajbakhsh@pasteur.fr](mailto:shahragim.tajbakhsh@pasteur.fr)

23 Tel: +33 1 40 61 35 20

24 Fax: +33 1 45 68 89 63

25

26 **ABSTRACT**

27

28 In vertebrates, head and trunk muscles develop from different mesodermal populations and are  
29 regulated by distinct genetic networks. Neck muscles at the head-trunk interface remain poorly  
30 defined due to their complex morphogenesis and dual mesodermal origins. Here, we use  
31 genetically modified mice to establish a 3D model that integrates regulatory genes, cell  
32 populations and morphogenetic events that define this transition zone. We show that the  
33 evolutionary conserved cucullaris-derived muscles originate from posterior cardiopharyngeal  
34 mesoderm, not lateral plate mesoderm, and we define new boundaries for neural crest and  
35 mesodermal contributions to neck connective tissue. Furthermore, lineage studies and functional  
36 analysis of *Tbx1*- and *Pax3*-null mice reveal a unique genetic program for somitic neck muscles  
37 that is distinct from that of somitic trunk muscles. Our findings unveil the embryological and  
38 developmental requirements underlying tetrapod neck myogenesis and provide a blueprint to  
39 investigate how muscle subsets are selectively affected in some human myopathies.

40

## 41 INTRODUCTION

42 The neck is composed of approximately 80 skeletal muscles in humans that allow head mobility,  
43 respiration, swallowing and vocalization processes, containing essential elements such as the  
44 trachea, esophagus, larynx, and cervical vertebrae. These processes are ensured by a robust  
45 network of muscles at the head-trunk interface, a transition zone subjected to a spectrum of human  
46 muscle diseases such as dropped head syndrome, oculopharyngeal myopathy, myotonic dystrophy,  
47 Duchenne-type dystrophy and congenital muscular disorders (Emery, 2002; Martin et al., 2011;  
48 Randolph and Pavlath, 2015). Defining the embryology of these distinct muscle groups is critical  
49 to understand the mechanisms underlying the susceptibility of specific muscles to muscular  
50 dystrophies. While myogenesis at the cranial and trunk levels has been studied extensively, the  
51 developmental mechanisms at the basis of neck muscle formation are poorly documented and  
52 often debated (Ericsson et al., 2013).

53  
54 In vertebrates, head and trunk muscles arise from different mesodermal origins and their  
55 development depends on distinct myogenic programs. At the cranial level, the cardiopharyngeal  
56 mesoderm (CPM) resides in pharyngeal arches and gives rise to branchiomeric muscles and the  
57 second heart field. Myogenic specification of the CPM is initiated by the activation of genes such  
58 as *Mesp1*, *Islet1* and *Tbx1*, while *Pax7* subsequently marks muscle stem cells (Diogo et al., 2015;  
59 Kelly et al., 2004; Nathan et al., 2008; Saga et al., 1996; Sambasivan et al., 2009). In contrast,  
60 *Pax3* and *Pax7* expression in the somitic mesoderm gives rise to trunk and limb muscles, with  
61 *Pax3* then being downregulated in most muscles during foetal stages, while *Pax7* maintains the  
62 stem cell pool (Kassar-Duchossoy et al., 2005; Relaix et al., 2005 ; Tajbakhsh et al., 1997). After  
63 the differential specification of cranial and trunk progenitors, the bHLH myogenic regulatory  
64 factors (MRFs) *Myf5*, *Mrf4*, *Myod* and *Myog* regulate myogenic cell fate and differentiation  
65 (reviewed in (Comai and Tajbakhsh, 2014; Noden and Francis-West, 2006)).

66

67 In early embryos, *Tbx1* is required for robust activation of MRF genes and proper branchiomic  
68 muscle formation (Grifone et al., 2008; Kelly et al., 2004; Kong et al., 2014; Sambasivan et al.,  
69 2009). In *Tbx1* mutant embryos, the first pharyngeal arch is hypoplastic and posterior pharyngeal  
70 arches do not form resulting in variably penetrant defects of masticatory muscles and absence of  
71 muscles derived from more posterior arches (Kelly et al., 2004; Lescroart et al., 2015; Theis et al.,  
72 2010). In humans, *TBX1* is a major gene involved in 22q11.2 deletion syndrome (DiGeorge/velo-  
73 cardio-facial syndrome), a congenital disease characterized by cardiovascular defects and  
74 craniofacial malformations (Papangeli and Scambler, 2013). In contrast, *Pax3* acts upstream of  
75 MRF genes in somites and *Pax3* mutants have defects of epaxial and hypaxial muscle formation  
76 while double *Pax3/Pax7*-null embryos lack trunk/limb muscles (Brown et al., 2005; Relaix et al.,  
77 2005; Tajbakhsh et al., 1997; Tremblay et al., 1998).

78

79 The neck constitutes a transition zone characterising land vertebrates (tetrapods). The major  
80 muscle groups in the neck consist of: epaxial back muscles; ventral hypaxial musculature;  
81 pharyngeal, laryngeal and esophagus striated muscles located medioventrally; and cucullaris-  
82 derived muscles. The cucullaris is a generic term defining putative homologous muscles that are  
83 evolutionarily conserved and connect the head and trunk in jawed vertebrates (gnathostomes). In  
84 amniotes, the cucullaris represents the embryonic anlage that gives rise to trapezius and  
85 sternocleidomastoid muscles which are innervated by the accessory nerve XI (Diogo, 2010;  
86 Edgeworth, 1935; Ericsson et al., 2013; Kuratani, 2008; Kuratani et al., 2018; Lubosch, 1938;  
87 Tada and Kuratani, 2015).

88

89 While the somitic origin of epaxial/hypaxial neck muscles and CPM origin of pharyngeal,  
90 laryngeal and esophagus striated muscles are well defined (Gopalakrishnan et al., 2015; Noden,

91 1983; Tabler et al., 2017), the embryological origin of cucullaris-derived muscles has remained a  
92 subject of controversy (Couly et al., 1993; Edgeworth, 1935; Greil, 1913; Huang et al., 1997;  
93 Huang et al., 2000; Matsuoka et al., 2005; Noden, 1983; Piatt, 1938; Piekarski and Olsson, 2007).  
94 This muscle group was reported to originate either from lateral plate mesoderm (LPM) or CPM  
95 populations adjacent to the first three somites in chick and axolotl (Nagashima et al., 2016; Sefton  
96 et al., 2016; Theis et al., 2010). However, retrospective lineage analysis indicated that the murine  
97 trapezius and sternocleidomastoid muscles are clonally related to second heart field-derived  
98 myocardium and laryngeal muscles, consistent with a CPM origin (Lescroart et al., 2015).  
99 Moreover, cucullaris development follows a branchiomic program and cucullaris-derived  
100 muscles were reported to be absent in *Tbx1*-null mice (Kelly et al., 2004; Lescroart et al., 2015;  
101 Sefton et al., 2016; Theis et al., 2010). Nevertheless, the source of the cucullaris is still equivocal  
102 due to the location of its embryonic anlagen at the interface of cranial, somitic and lateral plate  
103 mesodermal populations.

104  
105 Skeletal elements and muscle-associated connective tissue (MCT) also have distinct  
106 embryological origins along the rostro-caudal axis. The connective tissue of branchiomic and  
107 tongue muscles originate from neural crest cells (NCCs) of cranial origin (Evans and Noden,  
108 2006; Kontges and Lumsden, 1996; Noden, 1983, 1988; Ziermann et al., 2018b). Cranial NCCs  
109 also give rise to skeletal components and tendons in the head. In contrast, the skeleton and  
110 connective tissue originate from the somitic mesoderm in the trunk and from the LPM in limbs  
111 (Nassari et al., 2017). The neck and shoulder girdle contain skeletal elements and connective  
112 tissues of distinct NCC, LPM or somitic origins (Durland et al., 2008; Matsuoka et al., 2005;  
113 McGonnell et al., 2001; Nagashima et al., 2016; Tabler et al., 2017; Valasek et al., 2010). It has  
114 been suggested that NCCs form both connective tissue and endochondral cells at the attachment  
115 sites of neck muscles to shoulders in mouse (Matsuoka et al., 2005). However, studies in non-

116 mammalian animals have contested a NCC contribution to the pectoral girdle (Epperlein et al.,  
117 2012; Kague et al., 2012; Ponomartsev et al., 2017).

118  
119 Therefore, the neck region consists of muscle, skeletal and connective tissue elements of mixed  
120 cellular origins, underscoring the difficulty in assigning embryonic identities for these structures.  
121 In addition, the genetic requirements for the formation of non-somitic and somitic neck muscles  
122 remain to be defined. To resolve these issues, we used genetic lineage and loss of function mice  
123 combined with histology,  $\mu$ CT and 3D reconstructions to map the embryological origins of all  
124 neck muscles and associated connective tissues. In doing so, we show that cucullaris-derived  
125 muscles originate from a posterior CPM population and are differentially affected in *Tbx1*-null  
126 mice. Moreover, we identify a unique genetic network involving both *Mesp1* and *Pax3* genes for  
127 somite-derived neck muscles and we define a new limit of neural crest contribution to neck  
128 connective tissue and shoulder components.

129

## 130 RESULTS

### 131 Distinct myogenic programs define neck muscle morphogenesis

132 To investigate the embryological origin of neck muscles in mouse, we mapped CPM- and somite-  
133 derived myogenic cells using lineage-specific *Cre* drivers including *Mef2c-AHF*, *Islet1*, *Mesp1*  
134 and *Pax3* (Figure 1). The *Mef2c-AHF* (anterior heart field) enhancer is activated in the second  
135 heart field and myogenic progenitors of CPM origin (Lescroart et al., 2010; Verzi et al., 2005).  
136 *Islet1* and *Mesp1* genes are both expressed during branchiomic specification and are essential for  
137 cardiac development. The *Mesp1* lineage also marks some anterior somitic derivatives (Cai et al.,  
138 2003; Harel et al., 2009; Saga et al., 2000; Saga et al., 1999). In contrast, *Pax3* is activated in all  
139 somitic progenitors (Relaix et al., 2005; Tajbakhsh et al., 1997; Tremblay et al., 1998). Given that  
140 the majority of *Mef2c-AHF* derivatives are myogenic cells (Lescroart et al., 2015; Lescroart et al.,  
141 2010; Verzi et al., 2005), we analysed this lineage using *Rosa26<sup>R-lacZ/+</sup>* (*R26R*) reporter mice.  
142 *Islet1*, *Mesp1* and *Pax3* genes are also expressed in cells contributing to skeletal components,  
143 connective tissues or neurons. To focus on the myogenic lineage, we used *Pax7<sup>nGFP-stop/nlacZ</sup>*  
144 (*Pax7<sup>GPL</sup>*) reporter mice, which mark cells with nuclear  $\beta$ -galactosidase ( $\beta$ -gal) activity following  
145 *Cre* recombination (Sambasivan et al., 2013).

146  
147 We first examined embryos after myogenic specification (E10.5 and E11.75), and fetuses when  
148 muscles are patterned (E18.5). In *Mef2c-AHF<sup>Cre</sup>;R26R* embryos,  $\beta$ -gal-positive cells were  
149 observed in the mesodermal core of pharyngeal arches at the origin of branchiomic muscles, in  
150 second heart field derivatives, and in the cucullaris anlage (Figure 1A, E). A spatiotemporal  
151 analysis of the cucullaris using *Myf5<sup>Cre</sup>;Pax7<sup>GPL</sup>* and *Myf5<sup>Cre</sup>;R26<sup>mTmG</sup>* embryos (Figure 1-figure  
152 supplement 1) showed that *Myf5*-derived muscle progenitors located at the level of the posterior  
153 pharyngeal arches, and adjacent to somites S1-S3 (Figure 1-figure supplement 1A'), were  
154 innervated by the accessory nerve XI (Figure 1-figure supplement 1G-G"). These cells gave rise to

155 the trapezius and sternocleidomastoid muscles (Figure 1-figure supplement 1A-F') thus  
156 confirming the identity of the cucullaris anlage in mouse (Tada and Kuratani, 2015).

157  
158 In *Islet1<sup>Cre</sup>;Pax7<sup>GPL</sup>* and *Mesp1<sup>Cre</sup>;Pax7<sup>GPL</sup>* embryos, labelling was also observed in pharyngeal  
159 arch derivatives and the cucullaris (Figure 1B-C, F-G), the latter showing less contribution from  
160 the *Islet1* lineage. On sections, only a subset of the Myod-positive cells in the cucullaris originated  
161 from *Islet1*-derived cells (Figure 1-figure supplement 2A). Surprisingly, *Pax3<sup>Cre</sup>;Pax7<sup>GPL</sup>* embryos  
162 also showed *lacZ* expression in the cucullaris at E11.75, although no expression was detected at  
163 E10.5 (Figure 1D, H). Given that *Pax3* and *Pax7* are also expressed in neural crest cells (Relaix et  
164 al., 2004), and that these *Pax3*-derived cells were not positive for Myod expression (Figure 1-  
165 figure supplement 2B), they are likely to be of NCC origin. As expected, *Pax3* lineage tracing also  
166 labelled the somite-derived myotomes, hypaxial migrating progenitors that form the hypoglossal  
167 cord (origin of tongue and infrahyoid muscles), and limb muscle progenitors. Furthermore, the  
168 hypaxial anlage, which is located at the proximal limb bud and gives rise to the cutaneous  
169 maximus and latissimus dorsi muscles, was *Pax3*-derived (Figure 1D, H; Figure 1-figure  
170 supplement 1D') (Prunotto et al., 2004; Tremblay et al., 1998). Unexpectedly, this anlage and the  
171 latissimus dorsi muscle were also labelled in *Islet1<sup>Cre</sup>;Pax7<sup>GPL</sup>* but not in *Mesp1<sup>Cre</sup>;Pax7<sup>GPL</sup>*  
172 embryos (Figure 1F-G, J-K). On sections at E12.5, *Islet1* expression was observed after the  
173 emergence of myogenic cells from the proximal limb bud (Figure 1-figure supplement 2C). In  
174 addition, the *Mesp1* lineage contributed to anterior somitic derivatives during early embryonic  
175 development as previously reported (Loebel et al., 2012; Saga et al., 1999); strong *lacZ*  
176 expression was observed in the hypoglossal cord and somites S1-S6. Labelling subsequently  
177 decreased in more posterior myotomes and in forelimb muscle progenitors compared to  
178 *Pax3<sup>Cre</sup>;Pax7<sup>GPL</sup>* embryos (Figure 1C-D, G-H).

179



180 Lineage tracings with *Mef2c-AHF<sup>Cre</sup>*, *Islet1<sup>Cre</sup>* and *Mesp1<sup>Cre</sup>* marked branchiomic (temporal,  
181 masseter, digastric, mylohyoid and pharyngeal) and cucullaris-derived neck muscles  
182 (acromiotrapezius, spinotrapezius and sternocleidomastoid), all of which were excluded from the  
183 *Pax3* lineage (Figure 1I-L, Figure 1-figure supplement 2D-G'). These findings support previous  
184 studies showing that the cucullaris-derived muscles use a branchiomic program (Kelly et al.,  
185 2004; Lescroart et al., 2015; Sefton et al., 2016; Theis et al., 2010). In addition, both *Mesp1* and  
186 *Pax3* lineages labelled somitic neck muscles (Figure 1 K-L', Figure 1-figure supplement 2F-G')  
187 indicating that the *Mesp1* lineage contributes to neck muscles to a larger extent than previously  
188 reported (Figure 1K-K', Figure 1-figure supplement 2F-F') (Harel et al., 2009).

189  
190 To further investigate the contributions of *Mesp1* and *Pax3* lineages to neck muscles, we  
191 examined sections using the *R26<sup>tdTomato</sup>* reporter co-immunostained with the myofibre marker  
192 *Tnnt3* at three representative levels (A, B and C levels in Figure 1; see also Figure 2-figure  
193 supplement 1). At anterior levels, while *Pax3* lineage contribution was limited to somite-derived  
194 neck muscles, the *Mesp1* lineage marked branchiomic muscles (mylohyoid, pharyngeal,  
195 laryngeal, esophagus), cucullaris-derived muscles (acromiotrapezius and sternocleidomastoid) and  
196 somite-derived neck muscles (Figure 2A-H, Figure 1-figure supplement 2F-G', Figure 2-figure  
197 supplement 2A-H'). The epaxial and hypaxial neck muscles showed equivalent Tomato  
198 expression in both *Mesp1<sup>Cre</sup>;R26<sup>tdTomato</sup>* and *Pax3<sup>Cre</sup>;R26<sup>tdTomato</sup>* mice. These observations indicate  
199 that *Mesp1* and *Pax3* lineages contribute equivalently to neck muscles derived from anterior  
200 somites.

201  
202 At the shoulder level, we observed less *Mesp1* contribution to more posterior somitic muscles  
203 (Figure 2I-J). In contrast to that observed at anterior levels, little or no Tomato expression was  
204 detected in myofibres of scapular muscles in *Mesp1<sup>Cre</sup>;R26<sup>tdTomato</sup>* mice (Figure 2-figure

205 supplement 2I-J'). Therefore, *Mesp1* lineage contribution was restricted to epaxial and hypaxial  
206 somite-derived neck muscles in contrast to pectoral and trunk muscles that originate from the  
207 *Pax3* lineage (Figures 1-2) (Table 1). These observations lead us to propose that 3 distinct  
208 myogenic programs are involved in the formation of neck and pectoral musculature at the head-  
209 trunk interface. The branchiomic and cucullaris-derived muscles depend on a common  
210 myogenic program involving *Mef2c-AHF*, *Islet1* and *Mesp1* lineages; the somitic neck muscles  
211 that originate from anterior somites derive from both *Mesp1* and *Pax3* lineages; the pectoral  
212 muscles derived from more posterior somites depend on the activation of *Pax3* only (Table 1).

213

#### 214 **Dual neural crest and mesodermal origins of neck connective tissues**

215 To define the cellular origin of neck muscle-associated connective tissue (MCT), we traced the  
216 contribution of different embryonic populations using *Mesp1<sup>Cre</sup>;R26<sup>tdTomato</sup>* and *Pax3<sup>Cre</sup>;R26<sup>tdTomato</sup>*  
217 mice as well as *Wnt1<sup>Cre</sup>* and *Prx1<sup>Cre</sup>* reporters that label NCC and postcranial LPM derivatives  
218 respectively (Burke and Nowicki, 2003; Danielian et al., 1998; Durland et al., 2008). Both NCC  
219 and LPM populations were reported to participate to trapezius MCT (Durland et al., 2008;  
220 Matsuoka et al., 2005). Moreover, it was suggested that the postcranial LPM is a source for  
221 cucullaris-derived muscles (Theis et al., 2010). A direct comparison of NCC and LPM derivatives  
222 allowed us to clarify the contribution of these two populations to cucullaris formation (Figures 3-  
223 4).

224

225 We first investigated the distribution of neck muscles and NCCs using *Myf5<sup>nlacZ/+</sup>*, *Mef2c-*  
226 *AHF<sup>Cre</sup>;R26R*, *Pax3<sup>Cre</sup>;R26R* and *Wnt1<sup>Cre</sup>;R26R* embryos (Figure 3-figure supplement 1). At  
227 E10.5, the cucullaris anlage was positioned at the level of posterior pharyngeal arches where  
228 *Wnt1*-derived positive cells were detectable (Figure 1A-C, Figure 1-figure supplement 1A', Figure  
229 3-figure supplement 1A-B). Subsequently, the cucullaris progenitors expanded caudally from

230 E11.5 to E13.5. The posterior limit of the cranial NCC domain also extended posteriorly, however  
231 the *Wnt1*-labelled cells did not cover the posterior portion of cucullaris-derived muscles (Figure 3-  
232 figure supplement 1C-H). At E14.5, the acromiotrapezius and spinotrapezius attained their  
233 definitive position in *Myf5<sup>nlacZ/+</sup>* and *Mef2c-AHF<sup>Cre</sup>;R26R* embryos (Figure 3-figure supplement  
234 1I-J). *Wnt1*-derived cells were observed in the anterior acromiotrapezius muscle, but not in the  
235 spinotrapezius that was situated in a *Pax3*-derived domain (Figure 3-figure supplement 1K-L).  
236 Analysis of whole-mount embryos indicated that the cranial NCCs did not contribute to  
237 connective tissue of posterior cucullaris derivatives, in contrast to what was reported previously  
238 (Matsuoka et al., 2005).

239  
240 To further analyse NCC contribution to the cervical region at the cellular level, we performed  
241 immunostainings on sections for Tomato and *Tnnt3* in E18.5 *Wnt1<sup>Cre</sup>;R26<sup>tdTomato</sup>* fetuses (Figure  
242 3, Figure 3-figure supplement 2). Given that the *Wnt1* lineage is a source of both neuronal and  
243 connective tissue derivatives, we associated Tomato immunostaining with *Tuj1* that marks  
244 neuronal cells and with *Tcf4* that labels MCT fibroblasts (Figure 3, Figure 3-figure supplements 2-  
245 3). At the cranial level, the MCT of branchiomeric (masseter, mylohyoid) and tongue muscles was  
246 derived from *Wnt1*- and *Pax3*-lineages but not from the mesodermal *Mesp1* lineage (Figure 3-  
247 figure supplement 2A-B', Figure 3-figure supplement 3A, F, Figure 3-figure supplement 4A-B,  
248 E). The acromiotrapezius showed a high contribution from *Wnt1*-derived cells while the  
249 underlying epaxial muscles had considerably less labelled cells that were limited to the neuronal  
250 *Tuj1*-positive population (Figure 3A-A'). The *Wnt1* lineage gave rise to *Tcf4*-positive fibroblasts  
251 in the acromiotrapezius, but not in epaxial neck muscles, where fibroblasts were derived from the  
252 *Mesp1* lineage (Figure 3-figure supplements 3B-C, 4C). These observations are in accordance  
253 with a NCC origin of branchiomeric, trapezius and tongue connective tissue as reported previously  
254 (Matsuoka et al., 2005).

255  
256 However, the NCC contribution to connective tissue in the sternocleidomastoid subset of  
257 cucullaris-derived muscles appeared more heterogeneous than that observed in the  
258 acromiotrapezius. In rodents, the sternocleidomastoid is composed of three individual muscles  
259 (cleidomastoid, sternomastoid and cleido-occipitalis portions); a differential NCC contribution to  
260 MCT was observed in these muscles. While *Wnt1*-derived NCCs were widely present in the  
261 sternomastoid and cleido-occipitalis, the NCC contribution was limited in the cleidomastoid  
262 (Figure 3B-B'). Indeed, *Tcf4*-positive fibroblasts in the cleido-occipitalis originated from the *Wnt1*  
263 lineage whereas the majority of MCT fibroblasts in the cleidomastoid were derived from the  
264 *Mesp1* lineage (Figure 3-figure supplements 3D-E, 4D).

265  
266 A differential contribution of NCCs to connective tissue was also seen within the laryngeal and  
267 infrahyoid musculature. Extensive *Wnt1* lineage contributions to MCT was observed in laryngeal  
268 muscles (thyroarytenoid and cricothyroid) that connect to the thyroid cartilage, which is of NCC  
269 origin (Figure 3C-C') (Tabler et al., 2017). In contrast, the laryngeal muscles (cricoarytenoid and  
270 vocal muscles) that link mesoderm-derived laryngeal cartilages (cricoid, arytenoid and medio-  
271 caudal portion of the thyroid) did not contain NCC-derived connective tissue (Figures 2G-H, 3C-  
272 C') (Tabler et al., 2017). In these muscles, the *Wnt1*-derived cells were neuronal, as observed in  
273 the esophagus, whereas the MCT fibroblasts were derived from the *Mesp1* lineage (Figure 3C-C',  
274 Figure 3-figure supplements 2D-D', 4F). As another example, *Wnt1*-derived cells contributed to a  
275 greater extent to MCT in infrahyoid muscles (thyrohyoid muscles) that connect the hyoid and  
276 thyroid cartilage that are of NCC origin, compared to infrahyoid muscles (omohyoid and  
277 sternohyoid muscles) that link posteriorly pectoral structures of mesodermal origin (Figure 3-  
278 figure supplement 2C, C', H; Figure 3-figure supplement 3G-H). These observations suggest that  
279 MCT composition within laryngeal and infrahyoid muscles correlates in part with the embryonic

280 origin of the skeletal components to which they attach (Figure 2G-H, Figure 3C-C', Figure 3-  
281 figure supplement 2C-C', H).

282  
283 Given our findings that connective tissues of neck muscles have differential contributions of NCC  
284 and mesodermal populations, we analysed the caudal connections of the cucullaris-derived  
285 muscles to the pectoral girdle (Figure 3D, Figure 3-figure supplement 2E-H). The  
286 acromiotrapezius attaches dorsally to the nuchal ligament and ventrally to the scapular acromion  
287 process in continuity with the scapular spine. While *Wnt1*-derived cells were present dorsally  
288 (Figure 3A, Figure 3-figure supplement 2E), this contribution diminished gradually and was  
289 undetectable at the insertion on the scapula (Figure 3D-D', Figure 3-figure supplement 2F).  
290 Similarly, the sternocleidomastoid muscle showed limited NCC contribution to the attachment  
291 sites of the clavicle and sternum (Figure 3-figure supplement 2G-H). In contrast to what was  
292 previously described (Matsuoka et al., 2005), we did not observe NCC contribution to the  
293 shoulder endochondral tissue nor to the nuchal ligament (Figure 3-figure supplement 2E-H).  
294 Taken together, these observations define a novel boundary for neural crest contribution to  
295 neck/pectoral components. The posterior contribution limit of branchiomeric MCT occurs at the  
296 level of laryngeal muscles that connect to NCC skeletal derivatives. Moreover, NCCs do not  
297 participate in connecting posterior cucullaris and infrahyoid muscles to their skeletal elements.

298  
299 To assess the cellular origin of cucullaris connective tissue at posterior attachment sites, we next  
300 traced the contribution of lateral plate mesoderm (LPM) to the neck/shoulder region using *Prx1*<sup>Cre</sup>  
301 reporter mice (Durland et al., 2008; Logan et al., 2002) (Figure 4, Figure 4-figure supplements 1-  
302 2). Analysis of E9.5 embryos showed that *Prx1*-derived cells contribute to the forelimb bud and  
303 cells adjacent to the anterior-most somites (Figure 4A). At E12.5, the postcranial *Prx1*-derived  
304 domain clearly defined the lateral somitic frontier along the rostrocaudal axis (Durland et al.,

305 2008) and did not include the cucullaris anlage (Figure 4-figure supplement 1, white arrowheads).  
306 Whole-mount immunostainings for the myogenic markers Pax7/Myod/My32 and for GFP in  
307 *Prx1<sup>Cre</sup>;R26<sup>mTmG</sup>* embryos showed that *Prx1*-derived cells were present in the dorsal part of the  
308 cucullaris but did not contribute to myofibres (Figure 4B, white arrowheads). At E18.5, the *Prx1*  
309 lineage marked the limb, scapular and abdominal regions, whereas only a few *Prx1*-derived cells  
310 were detected in the cucullaris-derived sternocleidomastoid, acromiotrapezius and spinotrapezius  
311 muscles (Figure 4C-D). On sections, immunostaining for  $\beta$ -gal and Tnnt3 showed that *Prx1*-  
312 derived LPM contributed to limb/shoulder MCT and to skeletal components of the pectoral girdle  
313 (Figure 4E, Figure 4-figure supplement 2A-B). In contrast, fewer *Prx1*-derived cells were detected  
314 in the acromiotrapezius and little or no contribution was observed in the epaxial muscles (Figure  
315 4E, Figure 4-figure supplement 2B-C). In addition, only a limited number of *Prx1*-derived cells  
316 gave rise to Tcf4-positive fibroblasts in the trapezius muscles, but they contributed more  
317 extensively to the fibroblast population in scapular muscles (Figure 4F-F'', white arrowheads,  
318 Figure 4-figure supplement 2D-D''). Notably,  $\beta$ -gal expression for this lineage was not detected in  
319 trapezius myofibres thereby confirming the results obtained at E12.5 (Figure 4B-F'', Figure 4-  
320 figure supplements 1-2).

321  
322 Therefore, these observations reveal a dual NCC/LPM origin of trapezius connective tissue, with a  
323 decrease of NCC contribution at posterior attachment sites. Moreover, our analysis shows that the  
324 postcranial LPM does not give rise to cucullaris myofibres in contrast to what was suggested  
325 previously (Theis et al., 2010), thus providing further evidence for a branchiomic origin of the  
326 cucullaris.

327

328

329

### 330 **Divergent functions of *Tbx1* and *Pax3* in neck development**

331 Given the key role for *Tbx1* and *Pax3* genes in the specification of the CPM and somites  
332 respectively, we analysed the effect of inactivation of these genes on neck muscle formation  
333 compared to the muscle phenotypes observed at cranial and trunk levels. Analysis has been  
334 performed by immunostainings on sections and 3D reconstructions of the neck and pectoral girdle  
335 using high resolution micro-computed tomographic ( $\mu$ CT) scans of control, *Tbx1*<sup>-/-</sup> and *Pax3*<sup>-/-</sup>  
336 fetuses (Figures 5-6).

337  
338 Analysis of *Tbx1* mutants revealed unexpected features in cucullaris and hypaxial neck muscle  
339 formation. As previously described (Gopalakrishnan et al., 2015; Kelly et al., 2004), anterior  
340 branchiomic muscles (digastric and mylohyoid) showed phenotypic variations, whereas  
341 posterior branchiomic muscles (esophagus and intrinsic laryngeal muscles) and the  
342 acromiotrapezius were severely affected or undetectable (Figure 5B, E, H; Figure 6B) (Table 2).  
343 However, detailed examination of the cucullaris-derived muscles revealed a heterogeneous  
344 dependence on *Tbx1* function that was not reported previously (Lescroart et al., 2015; Theis et al.,  
345 2010). Unexpectedly, the sternocleidomastoid muscle was present bilaterally but smaller (Figure  
346 6B); the different portions (cleido-occipitalis, cleidomastoid and sternomastoid) were unilaterally  
347 or bilaterally affected in a stochastic manner. Moreover, while the epaxial neck and scapular  
348 muscles were unaffected (Figure 5E, Figure 6E-H), the hypaxial neck muscles derived from  
349 anterior somites were altered. Indeed, the tongue and longus capitis were reduced and the  
350 infrahyoid and longus colli muscles were severely affected or undetectable (Figure 5B, H, Figure  
351 6E, H; see interactive 3D PDFs in Rich Media Files 1-2).

352  
353 Analysis of *Pax3* mutants showed that the neck and pectoral muscles were differentially affected.  
354 As expected, the branchiomic and epaxial muscles developed normally but displayed

355 morphological differences adapted to malformations noted in some skeletal components (Figure  
356 5C, F; Figure 6C, I). However, whereas hypaxial trunk/limb muscles were severely affected or  
357 undetectable in *Pax3* mutants (Figure 5F, I; Figure 6 F, I) (Tajbakhsh et al., 1997; Tremblay et al.,  
358 1998), surprisingly the majority of hypaxial neck muscles derived from both *Mesp1* and *Pax3*  
359 lineages were present. Tongue muscles were reduced in size but patterned, the infrahyoid were  
360 hypoplastic, whereas the longus capitis and longus colli were unaffected (Figure 5C; Figure 6F, I;  
361 see interactive 3D PDF in Rich Media File 3). The phenotypes of the different muscle groups  
362 observed in *Tbx1* and *Pax3* mutants are summarized in Table 2.

363  
364 Taken together, these observations revealed that hypaxial muscles in the neck were less affected in  
365 *Pax3* mutants than more posterior hypaxial muscles, pointing to distinct requirements for *Pax3*  
366 function during neck and trunk muscle formation. In addition, *Tbx1* mutants exhibited more severe  
367 phenotypes in hypaxial neck muscles, thus highlighting distinct roles for this gene in  
368 branchiomic and hypaxial neck myogenesis.

369



370 **DISCUSSION**

371 The embryological origins of neck muscles and connective tissues at the head-trunk interface have  
372 been poorly defined largely due to their localisation at a transition zone that involves multiple  
373 embryonic populations. Using a combination of complementary genetically modified mice and 3D  
374 analysis that identifies muscles in the context of their bone attachments, we provide a detailed map  
375 of neck tissue morphogenesis and reveal some unexpected features regarding the muscle and  
376 connective tissue network.

377

378 **Branchiomic origin of cucullaris-derived muscles**

379 The mammalian neck consists of somitic epaxial/hypaxial muscles, branchiomic muscles and  
380 cucullaris-derived muscles (Table 1). The latter constitute a major innovation in vertebrate history,  
381 connecting the head to the pectoral girdle in gnathostomes and allowing head mobility in tetrapods  
382 (Ericsson et al., 2013). Recent studies in different organisms including shark, lungfish and  
383 amphibians suggest that the cucullaris develops in series with posterior branchial muscles and that  
384 its developmental origin is conserved among gnathostomes (Diogo, 2010; Naumann et al., 2017;  
385 Noda et al., 2017; Sefton et al., 2016; Ziermann et al., 2018a; Ziermann et al., 2017). However,  
386 multiple embryological origins including CPM, LPM and somites have been reported for the  
387 cucullaris, underscoring the difficulty in deciphering the morphogenesis of this and other muscles  
388 in the head-trunk transition zone (Huang et al., 2000; Nagashima et al., 2016; Sefton et al., 2016;  
389 Theis et al., 2010).

390

391 Our studies show that the cucullaris anlage is innervated by the accessory nerve XI (Tada and  
392 Kuratani, 2015) and develops contiguously with the mesodermal core of posterior arches and  
393 anterior-most somites 1-3. Our lineage analysis reveals that cucullaris development depends on a  
394 branchiomic myogenic program involving *Mef2c-AHF*, *Islet1* and *Mesp1* lineages in keeping

395 with previous results (Table 1) (Lescroart et al., 2015; Sefton et al., 2016; Theis et al., 2010).  
396 However, our detailed 3D reconstructions and functional analysis lead us to modify the view of  
397 the genetic requirements of cucullaris-derived muscles (Lescroart et al., 2015; Theis et al., 2010).  
398 Notably, these muscles are differentially affected in *Tbx1*-null foetuses; the acromiotrapezius does  
399 not form while the sternocleidomastoid is present but reduced. Therefore, *Tbx1* is differentially  
400 required for sternocleidomastoid and trapezius formation, suggesting that distinct subprograms  
401 regulate cucullaris development.

402  
403 We also demonstrate that the cucullaris anlage is excluded from the postcranial *Prx1*-derived  
404 expression domain, which instead gives rise to connective tissue, thereby excluding contribution  
405 from LPM to cucullaris-derived myofibres. Thus, our results, combined with grafting experiments  
406 in chick and axolotl (Nagashima et al., 2016; Sefton et al., 2016), suggest that the postcranial  
407 extension of the CPM lateral to the first three somites in tetrapod embryos is a source of cucullaris  
408 myogenic cells (Figure 7A). The discordance with previous studies regarding the origin of the  
409 cucullaris is likely due to its proximity to both anterior somites and LPM (Figure 7A-B), and  
410 consequently, to potential contamination of embryonic sources in grafting experiments (Couly et  
411 al., 1993; Huang et al., 1997; Huang et al., 2000; Noden, 1983; Piekarski and Olsson, 2007; Theis  
412 et al., 2010).

413  
414 **A unique genetic program for somite-derived neck muscles**  
415 Our study also points to a unique *Mesp1/Pax3* genetic program in anterior somites for  
416 epaxial/hypaxial neck muscle formation (Table 1). While it was shown that the *Mesp1* lineage  
417 gives rise to tongue muscles (Harel et al., 2009), we demonstrate that it also contributes to all neck  
418 muscles. In chordates, *Mesp* genes appear to play a conserved role in cardiogenesis and axis  
419 segmentation. In mouse, *Mesp1* inactivation causes early embryonic death from abnormal heart

420 development, and *Mesp1/Mesp2* double-knockout embryos lack non-axial mesoderm (Moreno et  
421 al., 2008; Saga, 1998; Saga et al., 2000; Satou et al., 2004; Sawada et al., 2000). During early  
422 murine development, *Mesp1* shows two waves of activation; initially in the nascent mesoderm  
423 destined for extraembryonic, cranial and cardiac mesoderm at the onset of gastrulation; later  
424 during somitogenesis, transient *Mesp1* expression is limited to anterior presomitic mesoderm  
425 (Saga, 1998; Saga et al., 1996; Saga et al., 2000; Saga et al., 1999). Our lineage analysis shows  
426 that *Mesp1* extensively labels the anterior mesoderm, including the CPM and anterior somites 1-6,  
427 while contribution decreases in more posterior somites (Loebel et al., 2012; Saga et al., 2000; Saga  
428 et al., 1999). Furthermore, we show that *Mesp1*-derived anterior somites give rise to all  
429 epaxial/hypaxial neck muscles in contrast to trunk/limb muscles originating from more posterior  
430 somites marked by *Pax3*. The boundary of *Mesp1* lineage contribution to muscles corresponds to  
431 the neck/pectoral interface. Our findings suggest that the anterior somitic mesoderm employs a  
432 specific “transition program” for neck muscle formation involving both *Mesp1* and *Pax3* genes  
433 implicated in CPM and somitic myogenesis respectively (Figure 7A-C).

434  
435 Whereas little is known about the function of *Mesp* genes in chordates, there is evidence that  
436 *Mesp1* might be differentially required during anterior *versus* posterior somitic formation. In  
437 mouse, different *Mesp1* enhancer activities have been observed between CPM/anterior somites  
438 and posterior somites indicating that the regulation of *Mesp1* expression might differ in the two  
439 embryonic compartments (Haraguchi et al., 2001). In zebrafish, quadruple mutants of *Mesp* genes  
440 (*Mesp-aa/-ab/-ba/-bb*) lack anterior somite segmentation while the positioning of posterior somite  
441 boundaries is unaffected, suggesting distinct requirements for *Mesp* genes in anterior and posterior  
442 somites (Yabe et al., 2016). Interestingly, during early ascidian development, *Mesp* is expressed in  
443 B7.5 founder cells that give rise to both CPM and anterior tail muscles (ATM) (Satou et al., 2004).  
444 In *Ciona*, the CPM precursors at the origin of heart and atrial siphon (pharyngeal) muscles depend

445 on the ascidian homologs of *Mesp1*, *Islet1* and *Tbx1* (reviewed in (Diogo et al., 2015)), indicating  
446 that a conserved genetic network promotes chordate myogenesis in the anterior embryonic  
447 domain.

448  
449 Our lineage analysis also reveals an unexpected contribution of *Islet1*-derived cells to the  
450 formation of cutaneous maximus and latissimus dorsi muscle progenitors (Table 1) (Prunotto et  
451 al., 2004; Tremblay et al., 1998). *Islet1* is activated in a subset of CPM progenitors giving rise to  
452 branchiomic muscles and second heart field myocardium (Cai et al., 2003; Harel et al., 2009;  
453 Nathan et al., 2008). At the trunk level, while *Islet1* is widely expressed in the nervous system and  
454 in the LPM forming the hindlimb bud (Cai et al., 2003; Yang et al., 2006), to our knowledge its  
455 expression in somitic myogenic cells has not been reported. The cutaneous maximus and  
456 latissimus dorsi muscles are missing in both *Pax3* and *Met* mutants (Prunotto et al., 2004;  
457 Tajbakhsh et al., 1997; Tremblay et al., 1998). Therefore, the formation of the latissimus dorsi and  
458 cutaneous maximus muscles depends on a specific developmental program implicating *Pax3*,  
459 *Islet1* and *Met* genes. Given that the latissimus dorsi and cutaneous maximus participated in the  
460 gain in mobility of the forelimbs towards the shoulder girdle in tetrapods, our findings provide  
461 insights into their genetic and evolutionary origins.

462  
463 Our detailed analysis of *Tbx1*- and *Pax3*-null mice on sections and in 3D reconstructions now  
464 provides a clarified view of neck muscle morphogenesis (Table 2). In both *Tbx1* and *Pax3*  
465 mutants, whereas the epaxial neck musculature is unaffected, the hypaxial muscles originating  
466 from anterior somites are perturbed with a more severe phenotype observed in *Tbx1* mutants  
467 (Table 2). Whereas no *Tbx1* expression has been reported in early myotomes in somites, *Tbx1*  
468 transcripts appear in hypaxial limb and tongue precursors after myogenic specification (Grifone et  
469 al., 2008; Kelly et al., 2004; Zoupa et al., 2006). *Tbx1*-null embryos show normal myotomal and

470 limb muscle morphology while the hypoglossal cord is hypoplastic, resulting in reduced tongue  
471 musculature (Table 2) (Grifone et al., 2008; Kelly et al., 2004). Therefore, we cannot exclude the  
472 possibility that *Tbx1* is activated and plays a role after specification of neck hypaxial muscles  
473 (Okano et al., 2008; Zoupa et al., 2006). The hypaxial muscle defects might also be secondary to a  
474 failure of caudal pharyngeal outgrowth (Kelly et al., 2004). While *Tbx1* acts cell autonomously in  
475 mesodermal progenitors (Kong et al., 2014; Zhang et al., 2006), its expression in pharyngeal  
476 endoderm might imply an indirect role in CPM myogenesis (Arnold et al., 2006). Defects in  
477 signalling from pharyngeal endoderm may explain the hypoglossal cord deficiency and the  
478 potential non-autonomous role for *Tbx1* in neck hypaxial myogenesis. Detailed analysis of muscle  
479 formation in conditional *Tbx1* mutants is needed to resolve the relative roles of *Tbx1* in neck  
480 myogenesis.

481  
482 It has been shown that hypaxial muscles are perturbed to a greater extent than epaxial muscles in  
483 *Pax3* mutants (Tajbakhsh et al., 1997; Tremblay et al., 1998), suggesting a different requirement  
484 for *Pax3* in these muscle groups, possibly through differential gene regulation (Brown et al.,  
485 2005). An unexpected outcome of our analysis was that neck hypaxial muscles (derived from  
486 *Mesp1* and *Pax3* lineages) are less perturbed in *Pax3*-null mutants than hypaxial muscles deriving  
487 from more posterior somites (*Pax3* lineage only) (Table 2). These observations support our model  
488 that a distinct genetic program governs somitic neck muscles compared to more posterior trunk  
489 muscles.

490  
491 **Connectivity network of the neck and shoulders**  
492 Assessing the non-muscle contribution to the neck region is a major challenge due to the extensive  
493 participation of diverse cell types from different embryological origins. Previous studies in  
494 amphibians, chick and mouse reported that branchiomeric and hypobranchial connective tissue

495 originates from NCCs (Hanken and Gross, 2005; Kontges and Lumsden, 1996; Matsuoka et al.,  
496 2005; Noden, 1983; Olsson et al., 2001; Ziermann et al., 2018b). It has been shown that the neural  
497 crest provides connective tissue for muscles that link the head and shoulders, whereas mesodermal  
498 cells give rise to connective tissue for muscles connecting the trunk and limbs (Matsuoka et al.,  
499 2005).

500  
501 Our findings demonstrate that not all branchiomic muscles are composed of neural crest-derived  
502 connective tissue, thereby redefining a new limit for NCC contribution to the neck and shoulders.  
503 Unexpectedly, we noted that the contribution of the neural crest lineage is limited in infrahyoid  
504 and posterior branchiomic muscles that connect skeletal components of mesodermal origin.  
505 Indeed, it appears that the connective tissue of muscles that link exclusively mesodermal skeletal  
506 derivatives is of mesodermal origin. In contrast, the connective tissue of cucullaris-derived  
507 muscles is of a mixed origin, first developing in a cranial NCC domain at early stages, then  
508 expanding to incorporate connective tissue from both neural crest and LPM populations (Figure  
509 7B). While NCCs are present in the anterior trapezius, sternocleidomastoid and infrahyoid  
510 muscles, contribution decreases at posterior attachment sites. In parallel, the LPM gives rise to  
511 shoulder skeletal components and to connective tissue of associated musculature including  
512 trapezius muscles (Figure 7C). Therefore, the dual NCC/LPM origin of the trapezius connective  
513 tissue correlates with the embryonic origin of skeletal components to which it is connected.

514  
515 *Wnt1<sup>Cre</sup>* and *Sox10<sup>Cre</sup>* NCC reporter mice were used to show that endochondral cells connecting  
516 the cucullaris-derived muscles on the scapula, clavicle and sternum share a common NCC origin  
517 with the connective tissue (Matsuoka et al., 2005). However, NCCs are not found in pectoral  
518 components of fish, axolotl and chick, while contribution to neurocranium is conserved,  
519 suggesting that NCC involvement in shoulder formation would be specific to mammals (Epperlein

520 et al., 2012; Kague et al., 2012; Piekarski et al., 2014; Ponomartsev et al., 2017). In contrast to this  
521 view, our lineage analysis reveals that the neural crest lineage shows limited contribution to  
522 cucullaris connective tissue and does not form endochondral cells at the posterior attachment sites  
523 (Figure 7C). Differences in genetic lineage tracers and reagents might explain these discordant  
524 results (Matsuoka et al., 2005). Taken together, our findings indicate that connective tissue  
525 composition in the neck region correlates with the cellular origin of the associated skeletal  
526 components, independently of the myogenic source or ossification mode (Figure 7D).

527

### 528 **Evolutionary and clinical perspectives**

529 Our findings demonstrate that the hybrid origin of the skeletal, connective tissue and muscle  
530 components of the neck is defined during early embryogenesis. The close proximity of neural  
531 crest, CPM, LPM and somitic populations is unique along the body plan and underscores the  
532 difficulty in defining their relative contributions to structures in the neck (Figure 7A-B). Our  
533 results refine the relative contributions of the neural crest and mesodermal derivatives in mouse,  
534 thereby providing a coherent view of embryonic components at the head-trunk interface in  
535 gnathostomes. Our study also highlights the mesodermal contribution to posterior branchiomic  
536 and infrahyoid connections. This reinforces recent notions suggesting that the cranial NCCs and  
537 the postcranial rearrangement of mesodermal populations at the head-trunk interface had been  
538 central for the establishment of the neck during gnathostome evolution (Adachi et al., 2018;  
539 Kuratani et al., 2018; Lours-Calet et al., 2014; Nagashima et al., 2016; Sefton et al., 2016). The  
540 contribution of anterior mesoderm in the origin of the neck needs to be elucidated in future studies  
541 of gnathostomes.

542

543 Our study reveals that neck muscles develop in a complex domain that is distinct from the head  
544 and trunk (Figure 7A-D), and that might be a contributing factor to pathologies that affect subsets

545 of neck muscles in specific myopathies (Emery, 2002; Randolph and Pavlath, 2015). In human,  
546 *TBX1* has been identified as a major candidate gene for 22q11.2 deletion syndrome (Papangeli and  
547 Scambler, 2013). Laryngeal malformations, esophageal dysmotility and shortened neck are  
548 frequent in patients. Moreover, the neck deficiencies might not be exclusively due to cervical  
549 spine abnormalities but also to neck muscle defects (Hamidi et al., 2014; Leopold et al., 2012;  
550 Marom et al., 2012). Therefore, our analysis of *Tbx1*-null mutants provides a better understanding  
551 of the aetiology of the 22q11.2 deletion syndrome and has direct implications in establishing  
552 clinical diagnosis in cases where patients present failure in neck-associated functions.  
553



## 554 MATERIALS AND METHODS

555

### 556 Animals

557 Animals were handled as per European Community guidelines and the ethics committee of the  
558 Institut Pasteur (CTEA) approved protocols. Males carrying the *Cre* driver gene, *Mef2c-AHF<sup>Cre</sup>*  
559 (Verzi et al., 2005), *Islet1<sup>Cre</sup>* (Srinivas et al., 2001), *Mesp1<sup>Cre</sup>* (Saga et al., 1999), *Pax3<sup>Cre</sup>* (Engleka  
560 et al., 2005), *Myf5<sup>Cre</sup>* (Haldar et al., 2007), *Wnt1<sup>Cre</sup>* (Danielian et al., 1998), *Prx1<sup>Cre</sup>* (Logan et al.,  
561 2002), were crossed to reporter females from previously described lines including *Pax7<sup>G<sup>PL</sup></sup>*  
562 (Sambasivan et al., 2013), *Rosa26<sup>R-lacZ</sup>* (*R26R*) (Soriano, 1999), *R26<sup>mTmG</sup>* (Muzumdar et al., 2007)  
563 and *R26<sup>tdTomato</sup>* (Madisen et al., 2010). *Myf5<sup>nlacZ/+</sup>* KI mice and mice carrying the *Tbx1<sup>tm1pa</sup>* allele  
564 (referred to as *Tbx1*-null) were previously described (Jerome and Papaioannou, 2001; Kelly et al.,  
565 2004; Tajbakhsh et al., 1996). To generate experimental *Pax3*-null fetuses, *Pax3<sup>WT/Cre</sup>* males and  
566 females were intercrossed (Engleka et al., 2005) (n=5 *Tbx1* and *Pax3* mutants analysed including  
567 n=2 by  $\mu$ CT scanning). Mice were crossed and maintained on a F1 C57/BL6:DBA2 background  
568 and genotyped by PCR. Mouse embryos and fetuses were collected between E9.5 and E18.5,  
569 with noon on the day of the vaginal plug considered as E0.5.

### 570 X-gal and immunofluorescence stainings

571 Whole-mount samples were analysed for beta-galactosidase activity with X-gal (0.6 mg/ml) in 1X  
572 PBS buffer (D1408, Sigma, St. Louis, MO) containing 4 mM potassium ferricyanide, 4 mM  
573 potassium ferrocyanide, 0.02% NP-40 and 2 mM MgCl<sub>2</sub> as previously described (Comai et al.,  
574 2014). For immunostaining on cryosections, fetuses were fixed 3h in 4% paraformaldehyde  
575 (PFA) (15710, Electron Microscopy Sciences, Hatfield, PA) 0.5 % Triton X-100 (T8787, Sigma)  
576 at 4°C, washed overnight at 4°C in PBS 0.1% Tween 20 (P1379, Sigma), cryopreserved in 30%  
577 sucrose in PBS and embedded in OCT for 12-16 $\mu$ m sectioning with a Leica cryostat (CM3050 S,  
578 Leica, Wetzlar, Germany). Cryosections were dried for 30 min and washed in PBS. For

579 immunostaining on paraffin sections, samples were fixed overnight in 4% PFA, dehydrated in  
580 graded ethanol series and penetrated with HistoClear II (HS-202, National Diagnostics, Atlanta,  
581 GA), embedded in paraffin and oriented in blocks. Paraffin blocks were sectioned at 10-12  $\mu\text{m}$   
582 using a Leica microtome (Reichert-Jung 2035). Sections were then deparaffinized and rehydrated  
583 by successive immersions in HistoClear, ethanol and PBS. Samples were then subjected to antigen  
584 retrieval with 10 mM Citrate buffer (pH 6.0) using a 2100 Retriever (Aptum Biologics,  
585 Rownhams, UK).

586  
587 Rehydrated sections were blocked for 1h in 10% normal goat serum, 3% BSA, 0.5% Triton X-100  
588 in PBS. Primary antibodies were diluted in blocking solution and incubated overnight at 4°C.  
589 Primary antibodies included the following:  $\beta$ -gal (1/1000, chicken polyclonal, ab9361, Abcam,  
590 Cambridge, UK; 1/750, rabbit polyclonal, MP 559761, MP Biomedicals, Illkirch, France), GFP  
591 (1/500, chick polyclonal, 1020, Aves Labs, Tigard, OR; 1/1000, chick polyclonal, 13970, Abcam),  
592 Islet1 (1/1000, mouse monoclonal IgG1, 40.2D6, DSHB), My32 (1/400, mouse monoclonal IgG1,  
593 M4276, Sigma), Myod (1/100, mouse monoclonal IgG1, M3512, Dako, Santa Clara, CA), Pax7  
594 (1/20, mouse monoclonal IgG1, AB\_528428), Tcf4 (1/150, rabbit polyclonal, C48H11, Cell  
595 Signalling, Leiden, Netherlands), Tnnt3 (1/200, monoclonal mouse IgG1, T6277, Sigma), Tomato  
596 (1/500, rabbit polyclonal, 632496, Clontech, Shiga, Japan; 1/250, chick polyclonal, 600-901-379,  
597 Rockland, Pottstown, PA) and Tuj1 (1/1000, monoclonal mouse IgG2a, BLE801202, Ozyme,  
598 Montigny-le-Bretonneux, France). After 3 rounds of 15 min washes in PBS 0.1% Tween 20,  
599 secondary antibodies were incubated in blocking solution 2h at RT together with 1 $\mu\text{g/ml}$  Hoechst  
600 33342 to visualize nuclei. Secondary antibodies consisted of Alexa 488, 555 or 633 goat anti-  
601 rabbit, anti-chicken or anti-mouse isotype specific (1/500, Jackson Immunoresearch,  
602 Cambridgeshire, UK). After 3 rounds of 15 min washes in PBS 0.1% Tween 20, slides were  
603 mounted in 70% glycerol for analysis.

604  
605 For whole-mount immunofluorescence staining, embryos were dissected in PBS, fixed in 4%  
606 PFA, washed in PBS and stored at -20°C in 100% methanol. After rehydration in PBS, whole  
607 mount immunostainings were performed incubating the primary and secondary antibodies for 3  
608 days each. Samples were cleared using benzyl alcohol/benzyl benzoate (BABB) clarification  
609 method (Yokomizo et al., 2012).

610  
611 **μCT scan analysis**

612 For μCT scan analysis, the foetuses were treated with the phosphotungstic acid (PTA) contrast  
613 agent to well reveal skeletal and muscle structures. After dissection of the cervical region  
614 (including the mandible and scapular components, see Figure 2-figure supplement 1), the foetuses  
615 were fixed in 4% PFA for 24h at 4°C. Samples were then additionally fixed and dehydrated by  
616 exchanging the fixative and washing solutions to incrementally increasing ethanol concentrations  
617 (30%, 50%, 70%) with 2 days in each concentration to minimize the shrinkage of tissues. To start  
618 the contrasting procedure the embryos were firstly incubated in ethanol-methanol-water mixture  
619 (4:4:3) for 1h and then transferred for 1h into 80% and 90% methanol solution. The staining  
620 procedure was then performed for 10 days in 90% methanol 1.5% PTA solution (changed every  
621 day with fresh solution) to ensure optimal penetration of the contrast agent. Staining was followed  
622 by rehydration of the samples in methanol grade series (90%, 80%, 70%, 50% and 30%) and  
623 stored in sterile distilled water. The samples were placed in polypropylene tubes and embedded in  
624 1% agarose gel to avoid movement artefacts during measurements. μCT scanning was performed  
625 using laboratory system GE Phoenix v|tome|x L 240 (GE Sensing & Inspection Technologies  
626 GmbH, Hamburg, Germany), equipped with a nanofocus X-ray tube with maximum power of 180  
627 kV/15 W and a flat panel detector DXR250 with 2048 × 2048 pixel<sup>2</sup>, 200 × 200 μm<sup>2</sup> pixel size.  
628 The μCT scan was carried out at 60 kV acceleration voltage and 200 μA tube current with voxel

629 size of 5.7  $\mu\text{m}$  for all samples. The beam was filtered by a 0.2 mm aluminium filter. The 2200  
630 projections were taken over 360° with exposure time of 900 ms. The tomographic reconstructions  
631 were done using the software GE phoenix datos|x 2.0 (GE Sensing & Inspection Technologies  
632 GmbH) and data segmentations and visualizations were performed by combination of software  
633 VG Studio MAX 2.2 (Volume Graphics GmbH, Heidelberg, Germany) and Avizo 7.1 (Thermo  
634 Fisher Scientific, Waltham, MA) according to (Tesařová et al., 2016). The interactive 3D PDFs  
635 were set up using 3D PDF maker software.

636

### 637 **Imaging**

638 Images were acquired using the following systems: a Zeiss Axio-plan equipped with an Apotome,  
639 a Zeiss stereo zoom microscope V16 or a Zeiss LSM 700 laser-scanning confocal microscope with  
640 ZEN software (Carl Zeiss, Oberkochen, Germany). For whole-mount rendering, acquired Z-stacks  
641 were 3D reconstructed using Imaris software. All images were assembled in Adobe Photoshop  
642 (Adobe Systems, San Jose, CA).

643

644 **ACKNOWLEDGEMENTS**

645 We thank Drs. Claudio Cortes and Françoise Helmbacher for providing transgenic mice and  
646 Mirialys Gallardo for technical assistance.

647

648 **COMPETING INTERESTS**

649 The authors declare no competing interests.

650

651 **REFERENCES**

- 652 Adachi, N., Pascual-Anaya, J., Hirai, T., Higuchi, S., Kuratani, S., 2018. Development of  
653 hypobranchial muscles with special reference to the evolution of the vertebrate neck.  
654 *Zoological letters* 4, 5.
- 655 Arnold, J.S., Werling, U., Braunstein, E.M., Liao, J., Nowotschin, S., Edelmann, W., Hebert, J.M.,  
656 Morrow, B.E., 2006. Inactivation of *Tbx1* in the pharyngeal endoderm results in 22q11DS  
657 malformations. *Development* 133, 977-987.
- 658 Brown, C.B., Engleka, K.A., Wenning, J., Min Lu, M., Epstein, J.A., 2005. Identification of a  
659 hypaxial somite enhancer element regulating *Pax3* expression in migrating myoblasts and  
660 characterization of hypaxial muscle Cre transgenic mice. *Genesis* 41, 202-209.
- 661 Burke, A.C., Nowicki, J.L., 2003. A new view of patterning domains in the vertebrate mesoderm.  
662 *Developmental cell* 4, 159-165.
- 663 Cai, C.L., Liang, X., Shi, Y., Chu, P.H., Pfaff, S.L., Chen, J., Evans, S., 2003. *Isl1* identifies a  
664 cardiac progenitor population that proliferates prior to differentiation and contributes a majority  
665 of cells to the heart. *Developmental cell* 5, 877-889.
- 666 Comai, G., Sambasivan, R., Gopalakrishnan, S., Tajbakhsh, S., 2014. Variations in the efficiency  
667 of lineage marking and ablation confound distinctions between myogenic cell populations.  
668 *Developmental cell* 31, 654-667.
- 669 Comai, G., Tajbakhsh, S., 2014. Molecular and cellular regulation of skeletal myogenesis. *Current*  
670 *topics in developmental biology* 110, 1-73.
- 671 Couly, G.F., Coltey, P.M., Le Douarin, N.M., 1993. The triple origin of skull in higher  
672 vertebrates: a study in quail-chick chimeras. *Development* 117, 409-429.
- 673 Danielian, P.S., Muccino, D., Rowitch, D.H., Michael, S.K., McMahon, A.P., 1998. Modification  
674 of gene activity in mouse embryos in utero by a tamoxifen-inducible form of Cre recombinase.  
675 *Current biology* : CB 8, 1323-1326.

- 676 Diogo, R., Kelly, R.G., Christiaen, L., Levine, M., Ziermann, J.M., Molnar, J.L., Noden, D.M.,  
677 Tzahor, E., 2015. A new heart for a new head in vertebrate cardiopharyngeal evolution. *Nature*  
678 520, 466-473.
- 679 Diogo, R.A., V. , 2010. *Muscles of Vertebrates - Comparative Anatomy, Evolution, Homologies*  
680 *and Development*. Enfield, New Hampshire: Science Publishers.
- 681 Durland, J.L., Sferlazzo, M., Logan, M., Burke, A.C., 2008. Visualizing the lateral somitic frontier  
682 in the Prx1Cre transgenic mouse. *Journal of anatomy* 212, 590-602.
- 683 Edgeworth, F.H., 1935. *The cranial muscles of vertebrates*. Cambridge University Press.
- 684 Emery, A.E., 2002. The muscular dystrophies. *Lancet* 359, 687-695.
- 685 Engleka, K.A., Gitler, A.D., Zhang, M., Zhou, D.D., High, F.A., Epstein, J.A., 2005. Insertion of  
686 Cre into the Pax3 locus creates a new allele of *Spotch* and identifies unexpected Pax3  
687 derivatives. *Developmental biology* 280, 396-406.
- 688 Epperlein, H.H., Khattak, S., Knapp, D., Tanaka, E.M., Malashichev, Y.B., 2012. Neural crest  
689 does not contribute to the neck and shoulder in the axolotl (*Ambystoma mexicanum*). *PloS one*  
690 7, e52244.
- 691 Ericsson, R., Knight, R., Johanson, Z., 2013. Evolution and development of the vertebrate neck.  
692 *Journal of anatomy* 222, 67-78.
- 693 Evans, D.J., Noden, D.M., 2006. Spatial relations between avian craniofacial neural crest and  
694 paraxial mesoderm cells. *Developmental dynamics : an official publication of the American*  
695 *Association of Anatomists* 235, 1310-1325.
- 696 Gopalakrishnan, S., Comai, G., Sambasivan, R., Francou, A., Kelly, R.G., Tajbakhsh, S., 2015. A  
697 Cranial Mesoderm Origin for Esophagus Striated Muscles. *Developmental cell* 34, 694-704.
- 698 Greil, A., 1913. *Entwicklungsgeschichte des Kopfes und des Blutgefässsystemes von Ceratodus*  
699 *forsteri*. II. Die  
700 epigenetischen Erwerbungen während der Stadien 39–48. *Denkschr Med-Naturwiss Ges Jena*.

- 701 Grifone, R., Jarry, T., Dandonneau, M., Grenier, J., Duprez, D., Kelly, R.G., 2008. Properties of  
702 branchiomic and somite-derived muscle development in *Tbx1* mutant embryos.  
703 *Developmental dynamics* : an official publication of the American Association of Anatomists  
704 237, 3071-3078.
- 705 Haldar, M., Hancock, J.D., Coffin, C.M., Lessnick, S.L., Capecchi, M.R., 2007. A conditional  
706 mouse model of synovial sarcoma: insights into a myogenic origin. *Cancer cell* 11, 375-388.
- 707 Hamidi, M., Nabi, S., Husein, M., Mohamed, M.E., Tay, K.Y., McKillop, S., 2014. Cervical spine  
708 abnormalities in 22q11.2 deletion syndrome. *Cleft Palate Craniofac J* 51, 230-233.
- 709 Hanken, J., Gross, J.B., 2005. Evolution of cranial development and the role of neural crest:  
710 insights from amphibians. *Journal of anatomy* 207, 437-446.
- 711 Haraguchi, S., Kitajima, S., Takagi, A., Takeda, H., Inoue, T., Saga, Y., 2001. Transcriptional  
712 regulation of *Mesp1* and *Mesp2* genes: differential usage of enhancers during development.  
713 *Mechanisms of development* 108, 59-69.
- 714 Harel, I., Nathan, E., Tirosh-Finkel, L., Zigdon, H., Guimaraes-Camboa, N., Evans, S.M., Tzahor,  
715 E., 2009. Distinct origins and genetic programs of head muscle satellite cells. *Developmental*  
716 *cell* 16, 822-832.
- 717 Huang, R., Zhi, Q., Ordahl, C.P., Christ, B., 1997. The fate of the first avian somite. *Anatomy and*  
718 *embryology* 195, 435-449.
- 719 Huang, R., Zhi, Q., Patel, K., Wilting, J., Christ, B., 2000. Contribution of single somites to the  
720 skeleton and muscles of the occipital and cervical regions in avian embryos. *Anatomy and*  
721 *embryology* 202, 375-383.
- 722 Jerome, L.A., Papaioannou, V.E., 2001. DiGeorge syndrome phenotype in mice mutant for the T-  
723 box gene, *Tbx1*. *Nature genetics* 27, 286-291.
- 724 Kague, E., Gallagher, M., Burke, S., Parsons, M., Franz-Odenaal, T., Fisher, S., 2012.  
725 Skeletogenic fate of zebrafish cranial and trunk neural crest. *PloS one* 7, e47394.



- 726 Kassar-Duchossoy, L., Giacone, E., Gayraud-Morel, B., Jory, A., Gomes, D., Tajbakhsh, S., 2005.  
727 Pax3/Pax7 mark a novel population of primitive myogenic cells during development. *Genes &*  
728 *development* 19, 1426-1431.
- 729 Kelly, R.G., Jerome-Majewska, L.A., Papaioannou, V.E., 2004. The del22q11.2 candidate gene  
730 Tbx1 regulates branchiomic myogenesis. *Human molecular genetics* 13, 2829-2840.
- 731 Kong, P., Racedo, S.E., Macchiarulo, S., Hu, Z., Carpenter, C., Guo, T., Wang, T., Zheng, D.,  
732 Morrow, B.E., 2014. Tbx1 is required autonomously for cell survival and fate in the pharyngeal  
733 core mesoderm to form the muscles of mastication. *Human molecular genetics* 23, 4215-4231.
- 734 Kontges, G., Lumsden, A., 1996. Rhombencephalic neural crest segmentation is preserved  
735 throughout craniofacial ontogeny. *Development* 122, 3229-3242.
- 736 Kuratani, S., 2008. Evolutionary developmental studies of cyclostomes and the origin of the  
737 vertebrate neck. *Development, growth & differentiation* 50 Suppl 1, S189-194.
- 738 Kuratani, S., Kusakabe, R., Hirasawa, T., 2018. The neural crest and evolution of the head/trunk  
739 interface in vertebrates. *Developmental biology*.
- 740 Leopold, C., De Barros, A., Cellier, C., Drouin-Garraud, V., Dehesdin, D., Marie, J.P., 2012.  
741 Laryngeal abnormalities are frequent in the 22q11 deletion syndrome. *Int J Pediatr*  
742 *Otorhinolaryngol* 76, 36-40.
- 743 Lescroart, F., Hamou, W., Francou, A., Theveniau-Ruissy, M., Kelly, R.G., Buckingham, M.,  
744 2015. Clonal analysis reveals a common origin between nonsomite-derived neck muscles and  
745 heart myocardium. *Proceedings of the National Academy of Sciences of the United States of*  
746 *America* 112, 1446-1451.
- 747 Lescroart, F., Kelly, R.G., Le Garrec, J.F., Nicolas, J.F., Meilhac, S.M., Buckingham, M., 2010.  
748 Clonal analysis reveals common lineage relationships between head muscles and second heart  
749 field derivatives in the mouse embryo. *Development* 137, 3269-3279.

- 750 Loebel, D.A., Hor, A.C., Bildsoe, H., Jones, V., Chen, Y.T., Behringer, R.R., Tam, P.P., 2012.  
751 Regionalized Twist1 activity in the forelimb bud drives the morphogenesis of the proximal and  
752 preaxial skeleton. *Developmental biology* 362, 132-140.
- 753 Logan, M., Martin, J.F., Nagy, A., Lobe, C., Olson, E.N., Tabin, C.J., 2002. Expression of Cre  
754 Recombinase in the developing mouse limb bud driven by a Prxl enhancer. *Genesis* 33, 77-80.
- 755 Lours-Calet, C., Alvares, L.E., El-Hanfy, A.S., Gandesha, S., Walters, E.H., Sobreira, D.R.,  
756 Wotton, K.R., Jorge, E.C., Lawson, J.A., Kelsey Lewis, A., Tada, M., Sharpe, C., Kardon, G.,  
757 Dietrich, S., 2014. Evolutionarily conserved morphogenetic movements at the vertebrate head-  
758 trunk interface coordinate the transport and assembly of hypopharyngeal structures.  
759 *Developmental biology* 390, 231-246.
- 760 Lubosch, W., 1938. Muskeln des Kopfes: Viscerale Muskulatur. In: Bolk L, Göppert E, Kallius E,  
761 Lubosch W *Handbuch Der Vergleichenden Anatomie Der Wirbeltiere*. Berlin: Urban &  
762 Schwarzenberg.
- 763 Madisen, L., Zwingman, T.A., Sunkin, S.M., Oh, S.W., Zariwala, H.A., Gu, H., Ng, L.L.,  
764 Palmiter, R.D., Hawrylycz, M.J., Jones, A.R., Lein, E.S., Zeng, H., 2010. A robust and high-  
765 throughput Cre reporting and characterization system for the whole mouse brain. *Nature*  
766 *neuroscience* 13, 133-140.
- 767 Marom, T., Roth, Y., Goldfarb, A., Cinamon, U., 2012. Head and neck manifestations of 22q11.2  
768 deletion syndromes. *Eur Arch Otorhinolaryngol* 269, 381-387.
- 769 Martin, A.R., Reddy, R., Fehlings, M.G., 2011. Dropped head syndrome: diagnosis and  
770 management. *Evidence-based spine-care journal* 2, 41-47.
- 771 Matsuoka, T., Ahlberg, P.E., Kessaris, N., Iannarelli, P., Dennehy, U., Richardson, W.D.,  
772 McMahon, A.P., Koentges, G., 2005. Neural crest origins of the neck and shoulder. *Nature* 436,  
773 347-355.

- 774 McGonnell, I.M., McKay, I.J., Graham, A., 2001. A population of caudally migrating cranial  
775 neural crest cells: functional and evolutionary implications. *Developmental biology* 236, 354-  
776 363.
- 777 Moreno, T.A., Jappelli, R., Izpisua Belmonte, J.C., Kintner, C., 2008. Retinoic acid regulation of  
778 the Mesp-Ripply feedback loop during vertebrate segmental patterning. *Developmental biology*  
779 315, 317-330.
- 780 Muzumdar, M.D., Tasic, B., Miyamichi, K., Li, L., Luo, L., 2007. A global double-fluorescent  
781 Cre reporter mouse. *Genesis* 45, 593-605.
- 782 Nagashima, H., Sugahara, F., Watanabe, K., Shibata, M., Chiba, A., Sato, N., 2016.  
783 Developmental origin of the clavicle, and its implications for the evolution of the neck and the  
784 paired appendages in vertebrates. *Journal of anatomy* 229, 536-548.
- 785 Nassari, S., Duprez, D., Fournier-Thibault, C., 2017. Non-myogenic Contribution to Muscle  
786 Development and Homeostasis: The Role of Connective Tissues. *Frontiers in cell and*  
787 *developmental biology* 5, 22.
- 788 Nathan, E., Monovich, A., Tirosh-Finkel, L., Harrelson, Z., Rousso, T., Rinon, A., Harel, I.,  
789 Evans, S.M., Tzahor, E., 2008. The contribution of *Islet1*-expressing splanchnic mesoderm  
790 cells to distinct branchiomic muscles reveals significant heterogeneity in head muscle  
791 development. *Development* 135, 647-657.
- 792 Naumann, B., Warth, P., Olsson, L., Konstantinidis, P., 2017. The development of the cucullaris  
793 muscle and the branchial musculature in the Longnose Gar, (*Lepisosteus osseus*,  
794 *Lepisosteiformes*, *Actinopterygii*) and its implications for the evolution and development of the  
795 head/trunk interface in vertebrates. *Evolution & development* 19, 263-276.
- 796 Noda, M., Miyake, T., Okabe, M., 2017. Development of cranial muscles in the actinopterygian  
797 fish Senegal bichir, *Polypterus senegalus* Cuvier, 1829. *J Morphol* 278, 450-463.

- 798 Noden, D.M., 1983. The embryonic origins of avian cephalic and cervical muscles and associated  
799 connective tissues. *The American journal of anatomy* 168, 257-276.
- 800 Noden, D.M., 1988. Interactions and fates of avian craniofacial mesenchyme. *Development* 103  
801 Suppl, 121-140.
- 802 Noden, D.M., Francis-West, P., 2006. The differentiation and morphogenesis of craniofacial  
803 muscles. *Developmental dynamics : an official publication of the American Association of*  
804 *Anatomists* 235, 1194-1218.
- 805 Okano, J., Sakai, Y., Shiota, K., 2008. Retinoic acid down-regulates Tbx1 expression and induces  
806 abnormal differentiation of tongue muscles in fetal mice. *Developmental dynamics : an official*  
807 *publication of the American Association of Anatomists* 237, 3059-3070.
- 808 Olsson, L., Falck, P., Lopez, K., Cobb, J., Hanken, J., 2001. Cranial neural crest cells contribute to  
809 connective tissue in cranial muscles in the anuran amphibian, *Bombina orientalis*.  
810 *Developmental biology* 237, 354-367.
- 811 Papangelis, I., Scambler, P., 2013. The 22q11 deletion: DiGeorge and velocardiofacial syndromes  
812 and the role of TBX1. *Wiley interdisciplinary reviews. Developmental biology* 2, 393-403.
- 813 Piatt, J., 1938. Morphogenesis of the cranial muscles of *Amblystoma punctatum*. *Journal of*  
814 *Morphology* 63, 531-587.
- 815 Piekarski, N., Gross, J.B., Hanken, J., 2014. Evolutionary innovation and conservation in the  
816 embryonic derivation of the vertebrate skull. *Nat Commun* 5, 5661.
- 817 Piekarski, N., Olsson, L., 2007. Muscular derivatives of the cranialmost somites revealed by long-  
818 term fate mapping in the Mexican axolotl (*Ambystoma mexicanum*). *Evolution & development*  
819 9, 566-578.
- 820 Ponomartsev, S., Valasek, P., Patel, K., Malashichev, Y.B., 2017. Neural crest contribution to the  
821 avian shoulder girdle and implications to girdle evolution in vertebrates. *Biological*  
822 *Communications* 62, 26-37.

- 823 Prunotto, C., Crepaldi, T., Forni, P.E., Ieraci, A., Kelly, R.G., Tajbakhsh, S., Buckingham, M.,  
824 Ponzetto, C., 2004. Analysis of Mlc-lacZ Met mutants highlights the essential function of Met  
825 for migratory precursors of hypaxial muscles and reveals a role for Met in the development of  
826 hyoid arch-derived facial muscles. *Developmental dynamics : an official publication of the*  
827 *American Association of Anatomists* 231, 582-591.
- 828 Randolph, M.E., Pavlath, G.K., 2015. A muscle stem cell for every muscle: variability of satellite  
829 cell biology among different muscle groups. *Frontiers in aging neuroscience* 7, 190.
- 830 Relaix, F., Rocancourt, D., Mansouri, A., Buckingham, M., 2004. Divergent functions of murine  
831 Pax3 and Pax7 in limb muscle development. *Genes & development* 18, 1088-1105.
- 832 Relaix, F., Rocancourt, D., Mansouri, A., Buckingham, M., 2005. A Pax3/Pax7-dependent  
833 population of skeletal muscle progenitor cells. *Nature* 435, 948-953.
- 834 Saga, Y., 1998. Genetic rescue of segmentation defect in MesP2-deficient mice by MesP1 gene  
835 replacement. *Mechanisms of development* 75, 53-66.
- 836 Saga, Y., Hata, N., Kobayashi, S., Magnuson, T., Seldin, M.F., Taketo, M.M., 1996. MesP1: a  
837 novel basic helix-loop-helix protein expressed in the nascent mesodermal cells during mouse  
838 gastrulation. *Development* 122, 2769-2778.
- 839 Saga, Y., Kitajima, S., Miyagawa-Tomita, S., 2000. Mesp1 expression is the earliest sign of  
840 cardiovascular development. *Trends in cardiovascular medicine* 10, 345-352.
- 841 Saga, Y., Miyagawa-Tomita, S., Takagi, A., Kitajima, S., Miyazaki, J., Inoue, T., 1999. MesP1 is  
842 expressed in the heart precursor cells and required for the formation of a single heart tube.  
843 *Development* 126, 3437-3447.
- 844 Sambasivan, R., Comai, G., Le Roux, I., Gomes, D., Konge, J., Dumas, G., Cimper, C.,  
845 Tajbakhsh, S., 2013. Embryonic founders of adult muscle stem cells are primed by the  
846 determination gene Mrf4. *Developmental biology* 381, 241-255.

- 847 Sambasivan, R., Gayraud-Morel, B., Dumas, G., Cimper, C., Paisant, S., Kelly, R.G., Tajbakhsh,  
848 S., 2009. Distinct regulatory cascades govern extraocular and pharyngeal arch muscle  
849 progenitor cell fates. *Developmental cell* 16, 810-821.
- 850 Satou, Y., Imai, K.S., Satoh, N., 2004. The ascidian *Mesp* gene specifies heart precursor cells.  
851 *Development* 131, 2533-2541.
- 852 Sawada, A., Fritz, A., Jiang, Y.J., Yamamoto, A., Yamasu, K., Kuroiwa, A., Saga, Y., Takeda, H.,  
853 2000. Zebrafish *Mesp* family genes, *mesp-a* and *mesp-b* are segmentally expressed in the  
854 presomitic mesoderm, and *Mesp-b* confers the anterior identity to the developing somites.  
855 *Development* 127, 1691-1702.
- 856 Sefton, E.M., Bhullar, B.A., Mohaddes, Z., Hanken, J., 2016. Evolution of the head-trunk  
857 interface in tetrapod vertebrates. *eLife* 5, e09972.
- 858 Soriano, P., 1999. Generalized *lacZ* expression with the ROSA26 Cre reporter strain. *Nature*  
859 *genetics* 21, 70-71.
- 860 Srinivas, S., Watanabe, T., Lin, C.S., Williams, C.M., Tanabe, Y., Jessell, T.M., Costantini, F.,  
861 2001. Cre reporter strains produced by targeted insertion of EYFP and ECFP into the ROSA26  
862 locus. *BMC developmental biology* 1, 4.
- 863 Tabler, J.M., Rigney, M.M., Berman, G.J., Gopalakrishnan, S., Heude, E., Al-Lami, H.A.,  
864 Yannakoudakis, B.Z., Fitch, R.D., Carter, C., Vokes, S., Liu, K.J., Tajbakhsh, S., Egnor, S.R.,  
865 Wallingford, J.B., 2017. Cilia-mediated Hedgehog signaling controls form and function in the  
866 mammalian larynx. *eLife* 6.
- 867 Tada, M.N., Kuratani, S., 2015. Evolutionary and developmental understanding of the spinal  
868 accessory nerve. *Zoological letters* 1, 4.
- 869 Tajbakhsh, S., Rocancourt, D., Buckingham, M., 1996. Muscle progenitor cells failing to respond  
870 to positional cues adopt non-myogenic fates in *myf-5* null mice. *Nature* 384, 266-270.

- 871 Tajbakhsh, S., Rocancourt, D., Cossu, G., Buckingham, M., 1997. Redefining the genetic  
872 hierarchies controlling skeletal myogenesis: Pax-3 and Myf-5 act upstream of MyoD. *Cell* 89,  
873 127-138.
- 874 Tesařová, M., Zikmund, T., Kaucká, M., Adameyko, I., Jaroš, J., Paloušek, D., Škaroupka, D.,  
875 Kaiser, J., 2016. Use of micro computed-tomography and 3D printing for reverse engineering  
876 of mouse embryo nasal capsule. *Journal of Instrumentation* 11.
- 877 Theis, S., Patel, K., Valasek, P., Otto, A., Pu, Q., Harel, I., Tzahor, E., Tajbakhsh, S., Christ, B.,  
878 Huang, R., 2010. The occipital lateral plate mesoderm is a novel source for vertebrate neck  
879 musculature. *Development* 137, 2961-2971.
- 880 Tremblay, P., Dietrich, S., Mericskay, M., Schubert, F.R., Li, Z., Paulin, D., 1998. A crucial role  
881 for Pax3 in the development of the hypaxial musculature and the long-range migration of  
882 muscle precursors. *Developmental biology* 203, 49-61.
- 883 Valasek, P., Theis, S., Krejci, E., Grim, M., Maina, F., Shwartz, Y., Otto, A., Huang, R., Patel, K.,  
884 2010. Somitic origin of the medial border of the mammalian scapula and its homology to the  
885 avian scapula blade. *Journal of anatomy* 216, 482-488.
- 886 Verzi, M.P., McCulley, D.J., De Val, S., Dodou, E., Black, B.L., 2005. The right ventricle,  
887 outflow tract, and ventricular septum comprise a restricted expression domain within the  
888 secondary/anterior heart field. *Developmental biology* 287, 134-145.
- 889 Yabe, T., Hoshijima, K., Yamamoto, T., Takada, S., 2016. Quadruple zebrafish mutant reveals  
890 different roles of Mesp genes in somite segmentation between mouse and zebrafish.  
891 *Development* 143, 2842-2852.
- 892 Yang, L., Cai, C.L., Lin, L., Qyang, Y., Chung, C., Monteiro, R.M., Mummery, C.L., Fishman,  
893 G.I., Cogen, A., Evans, S., 2006. *Isl1*Cre reveals a common Bmp pathway in heart and limb  
894 development. *Development* 133, 1575-1585.

- 895 Yokomizo, T., Yamada-Inagawa, T., Yzaguirre, A.D., Chen, M.J., Speck, N.A., Dzierzak, E.,  
896 2012. Whole-mount three-dimensional imaging of internally localized immunostained cells  
897 within mouse embryos. *Nature protocols* 7, 421-431.
- 898 Zhang, Z., Huynh, T., Baldini, A., 2006. Mesodermal expression of *Tbx1* is necessary and  
899 sufficient for pharyngeal arch and cardiac outflow tract development. *Development* 133, 3587-  
900 3595.
- 901 Ziermann, J.M., Clement, A.M., Ericsson, R., Olsson, L., 2018a. Cephalic muscle development in  
902 the Australian lungfish, *Neoceratodus forsteri*. *J Morphol* 279, 494-516.
- 903 Ziermann, J.M., Diogo, R., Noden, D.M., 2018b. Neural crest and the patterning of vertebrate  
904 craniofacial muscles. *Genesis*, e23097.
- 905 Ziermann, J.M., Freitas, R., Diogo, R., 2017. Muscle development in the shark *Scyliorhinus*  
906 *canicula*: implications for the evolution of the gnathostome head and paired appendage  
907 musculature. *Frontiers in zoology* 14, 31.
- 908 Zoupa, M., Seppala, M., Mitsiadis, T., Cobourne, M.T., 2006. *Tbx1* is expressed at multiple sites  
909 of epithelial-mesenchymal interaction during early development of the facial complex. *The*  
910 *International journal of developmental biology* 50, 504-510.
- 911
- 912



914 **FIGURE LEGENDS**

915

916 **Figure 1. Genetic lineage tracing of neck muscle progenitors.**

917 Whole-mount X-gal stainings of *Mef2c-AHF<sup>Cre</sup>;R26R*, *Islet1<sup>Cre</sup>;Pax7<sup>GPL</sup>*, *Mesp1<sup>Cre</sup>;Pax7<sup>GPL</sup>* and  
918 *Pax3<sup>Cre</sup>;Pax7<sup>GPL</sup>* mice at E10.5 (A-D), E11.75 (E-H) and E18.5 (I-L') (n=3 for each condition).

919 See associated figure supplements 1-2.

920 (A-H) Note labelling of mesodermal core of pharyngeal arches (PAs) and cucullaris anlage (*ccl*)  
921 by *Mef2c-AHF*, *Islet1* and *Mesp1* lineage reporters; β-gal+ cells in anterior somites of *Mesp1<sup>Cre</sup>*  
922 embryos and in the *clp* anlagen of *Islet1<sup>Cre</sup>* embryos. *Pax3* lineage marked somitic mesoderm.

923 (I-L') *Mef2c-AHF*, *Islet1* and *Mesp1* lineages marked branchiomic (mas, trp, dg) and cucullaris  
924 muscles (stm, atp and stp). *Pax3<sup>Cre</sup>* and *Mesp1<sup>Cre</sup>* labelled somitic epaxial neck muscles.

925 atp, acromiotrapezius; ccl, cucullaris anlage; clp, cutaneous maximus/latissimus dorsi precursor;  
926 dg, digastric h, heart; hc, hypoglossal cord; lbm, limb muscle anlagen and limb muscles; ltd,  
927 latissimus dorsi; mas, masseter; nc, nasal capsule; nt, neural tube; PA1-2, pharyngeal arches 1-2;  
928 S3, somite 3; stm, sternocleidomastoid; stp, spinotrapezius; trp; temporal. Scale bars: in D for A-D  
929 and in H for E-H, 1000 μm; in L for I-L', 2000 μm.

930

931 **Figure 2. Differential contributions of *Mesp1* and *Pax3* lineages to neck and shoulders.**

932 Immunostainings on coronal cryosections of E18.5 *Mesp1<sup>Cre</sup>;R26<sup>tdTomato</sup>* and *Pax3<sup>Cre</sup>;R26<sup>tdTomato</sup>*  
933 mice for the myofibre Tnnt3 and Tomato markers at levels indicated in Figure 1. Higher  
934 magnifications of selected areas in (A-J) are shown in figure supplement 2; (n=2 for each  
935 condition). See also figure supplement 1.

936 (A-H) *Mesp1<sup>Cre</sup>* labelled all neck muscles including branchiomic (myh, esm, phm and ilm),  
937 cucullaris (stm, atp), somitic epaxial (epm) and hypaxial (tg, lcp, lcl, ifh) muscles. *Pax3<sup>Cre</sup>* marked  
938 somitic muscles.

939 (I-J) At shoulder level, *Mesp1*-derived cells did not contribute to posterior somitic myofibres  
940 including scapular muscles (scm) compared to that observed in *Pax3<sup>Cre</sup>* embryos.

941 ac, arytenoid cartilage; acp, scapular acromion process; atp, acromiotrapezius; cc, cricoid  
942 cartilage; esm, esophagus striated muscle; ifh, infrahyoid muscles; ilm, intrinsic laryngeal  
943 muscles; lcl, longus colli; lcp, longus capitis; myh, mylohyoid; ob, occipital bone; oc, otic capsule;  
944 phm, pharyngeal muscles; stm, sternocleidomastoid; scm, scapular musculature; tc, thyroid  
945 cartilage; tg, tongue muscles. Scale bars: in J for A-B 200  $\mu$ m, for C-J 400  $\mu$ m.

946

### 947 **Figure 3. Neural crest contribution to neck muscle-associated tissue.**

948 Immunostainings on coronal cryosections of E18.5 *Wnt1<sup>Cre</sup>;R26<sup>tdTomato</sup>* mice at levels indicated in  
949 Figure 1. Tnnt3/Tomato immunostainings are shown in (A-D) and immunostainings for  
950 Tuj1/Tomato on selected areas of (A-D) are shown with higher magnifications in (A'-D'). See  
951 associated figure supplements 1-4; (n=2).

952 (A-A') Note high *Wnt1* contribution in the acromiotrapezius but not epaxial muscles where *Wnt1*-  
953 derived cells marked neuronal cells.

954 (B-C') *Wnt1*-derived cells marked differentially the distinct muscles composing the  
955 sternocleidomastoid and laryngeal musculatures.

956 (D-D') At shoulder level, the *Wnt1* cells did not contribute to attachment of acromiotrapezius to  
957 scapula.

958 ac, arytenoid cartilage; acp, scapular acromion process; atp, acromiotrapezius; cc, cricoid  
959 cartilage; clm, cleidomastoid; clo, cleido-occipitalis; ct, cricothyroid; ifh, infrahyoid muscles; lca,  
960 lateral cricoarytenoid; MCT, muscle-associated connective tissue; phm, pharyngeal muscles; std,  
961 sternomastoid; tam, thyroarytenoid muscle; tc, thyroid cartilage. Scale bars: in D' for A-D 400  $\mu$ m  
962 for A'-D' 200  $\mu$ m.

963

964 **Figure 4. *Prx1*-LPM lineage contribution to neck and pectoral girdle.**

965 See also Figure supplements 1-2.

966 (A-D) X-gal stainings of *Prx1<sup>Cre</sup>;R26R* reporter mice at E9.5 (n=3) (A) and E18.5 (n=3) (C-D),  
967 and immunostaining for GFP and the Pax7/Myod/My32 myogenic markers in *Prx1<sup>Cre</sup>;R26<sup>mTmG</sup>*  
968 E12.5 embryo (n=2) (B). Note *Prx1*-derived cells in postcranial LPM (A, black arrowheads) and  
969 *Prx1*-derived cells among, but not in, cucullaris myofibres (B-D).

970 (E-F'') Immunostaining for  $\beta$ -gal, Tnnt3 and Tcf4 on coronal cryosections of E18.5 *Prx1<sup>Cre</sup>;R26R*  
971 mice (n=2) showed  $\beta$ -gal+ cells constituting the pectoral girdle (E, level C in Figure 1) and in  
972 MCT fibroblasts (F-F'', white arrowheads), but not in trapezius myofibres.

973 acp, scapular acromion process; atp, acromiotrapezius; ccl, cucullaris anlage; ccp, scapular  
974 coracoid process; cl, clavicle; epm, epaxial neck musculature; hh, humeral head; LPM, lateral  
975 plate mesoderm; lb, forelimb bud; lbm, limb muscle anlagen; ltd, latissimus dorsi; PA1-6,  
976 pharyngeal arches 1-6; S3, somite 3; scm, scapular muscles; stm, sternocleidomastoid; stp,  
977 spinotrapezius. Scale bars: in A for A, B 500  $\mu$ m; in C for C-D 2000  $\mu$ m, for E 500  $\mu$ m; in F'' for  
978 F-F'' 20 $\mu$ m.

979

980 **Figure 5. Neck muscle phenotypes in *Tbx1* and *Pax3* mutants.**

981 Immunostainings for Tnnt3 differentiation marker on coronal cryosections of control, *Tbx1-null*  
982 and *Pax3-null* foetuses at E18.5 (n=3 each condition). Yellow asterisks indicate missing muscles.

983 (A-I) Note absence of branchiomic laryngeal, esophagus and trapezius muscles and severe  
984 alteration of somitic hypaxial muscles in *Tbx1* mutants. Scapular and pectoral muscles are missing  
985 in *Pax3* mutants.

986 ac, arytenoid cartilage; atp, acromiotrapezius; cc, cricoid cartilage; cl, clavicle; esm, esophagus  
987 striated muscle; ifh, infrahyoid muscles; ilm, intrinsic laryngeal muscles; lcp, longus capitis; ptm,

988 pectoralis muscles; sc, scapula; st, sternum; tc, thyroid cartilage; tg, tongue musculature. Scale  
989 bars: in A for A-I 500  $\mu\text{m}$ .

990

991 **Figure 6. 3D reconstructions of neck musculoskeletal system in *Tbx1* and *Pax3* mutants.**

992 See interactive 3D PDFs in Rich Media Files 1-3; control n=1; mutants n=2.

993 (A-C) Branchiomic and cucullaris muscles marked by *Mef2c-AHF/Islet1/Mesp1* are indicated in  
994 pink.

995 (D-F) anterior somitic muscles (*Mesp1*, *Pax3* lineages), in red.

996 (G-I) scapular muscles from more posterior somites (*Pax3* lineage), in violet.

997 atp, acromiotrapezius; dg, digastric muscles; epm, epaxial neck musculature; ifh, infrahyoid  
998 muscles; ilm, intrinsic laryngeal muscles; lcl, longus colli; lcp, longus capitis; myh, mylohyoid; sc,  
999 scapula; scm, scapular muscles; stm, sternocleidomastoid; tc, thyroid cartilage; tg, tongue  
1000 musculature.

1001

1002 **Figure 7. Model for musculoskeletal and connective tissue relationships during murine neck**  
1003 **development.**

1004 (A, C) CPM (pink), anterior somites (red) and more posterior somites (violet) –derived muscles  
1005 are defined by three distinct genetic programs. Note that the cucullaris develops a in NC domain  
1006 (blue), but is excluded from the postcranial LPM (yellow) (B). Dual NC/LPM origin of trapezius  
1007 connective tissue is indicated (C-a). NC contribution to connective tissue extends to tongue and  
1008 anterior infrahyoid musculature (C-b).

1009 (D) Mixed origins of muscle connective tissues at the head-trunk-limb interface.

1010 atp, acromiotrapezius; ccl, cucullaris; CPM, cardiopharyngeal mesoderm; epm, epaxial neck  
1011 muscles; hpm, hypaxial neck muscles; LPM, postcranial lateral plate mesoderm; NC, neural crest;

1012 PA1-2, pharyngeal arches 1-2; PM, paraxial mesoderm; stm, sternocleidomastoid; stp,

1013 spinotrapezius.

1014

***Mef2c-AHF<sup>Cre</sup> ; R26R***

***Islet1<sup>Cre</sup> ; Pax7<sup>GPL</sup>***

***Mesp1<sup>Cre</sup> ; Pax7<sup>GPL</sup>***

***Pax3<sup>Cre</sup> ; Pax7<sup>GPL</sup>***

**E10.5**

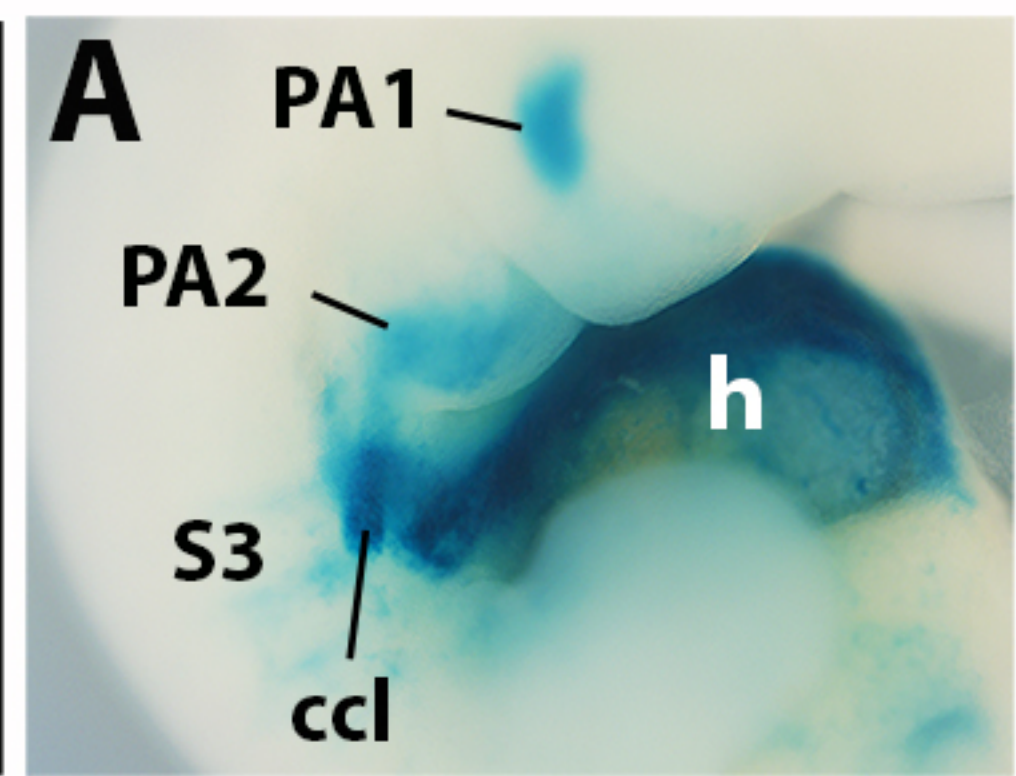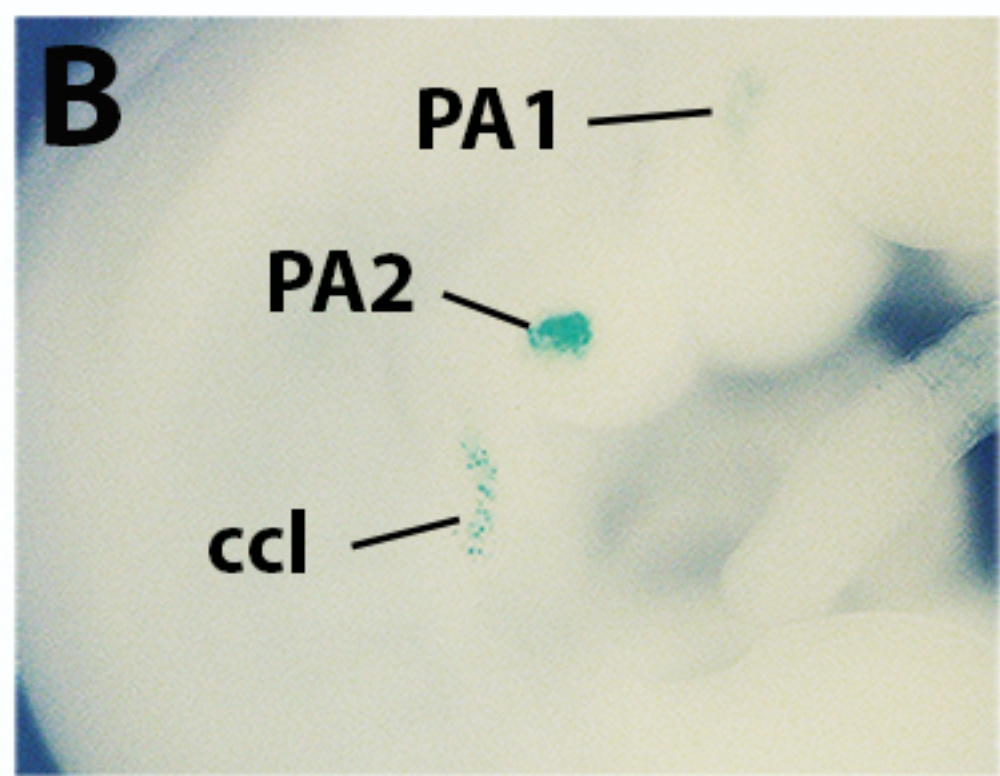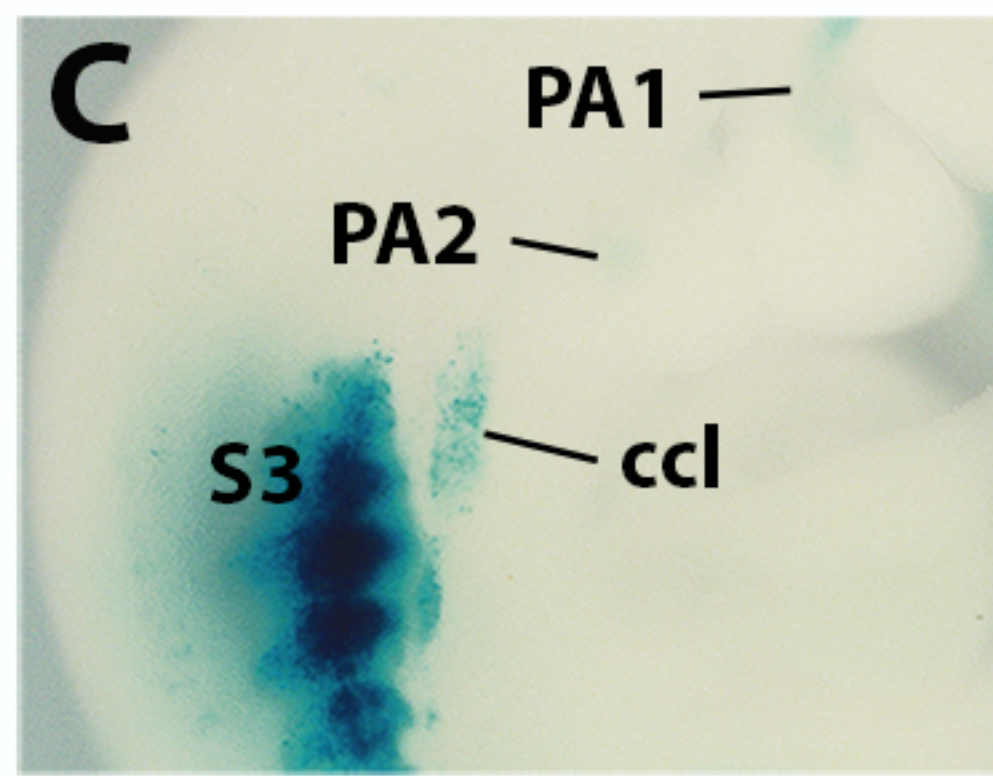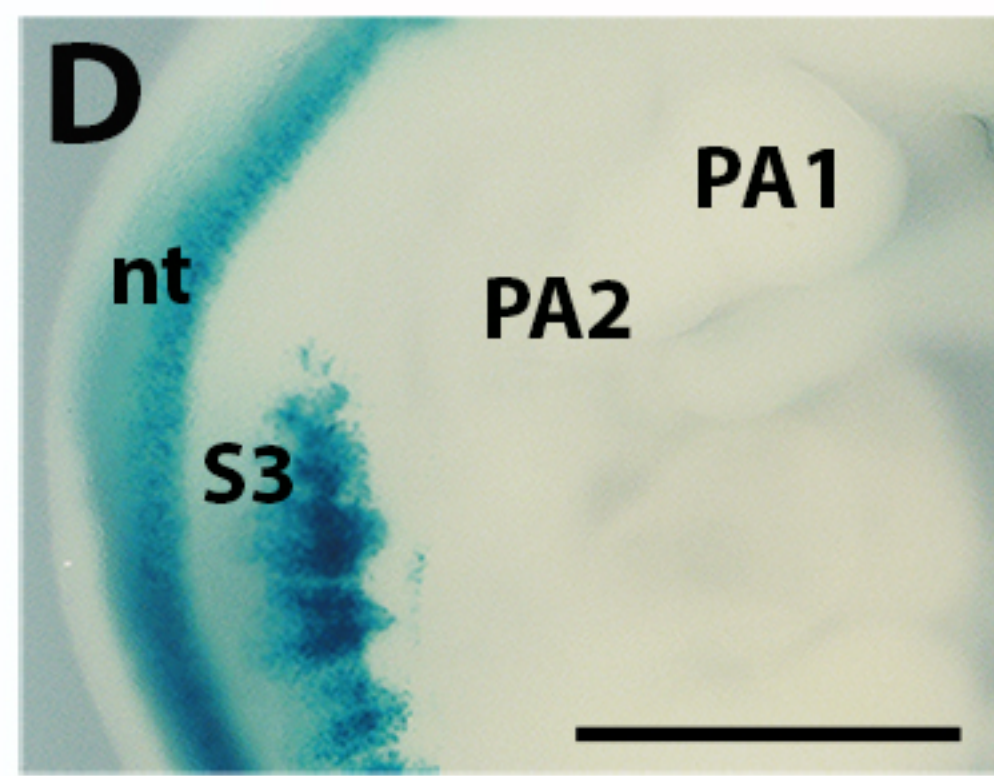

**E11.75**

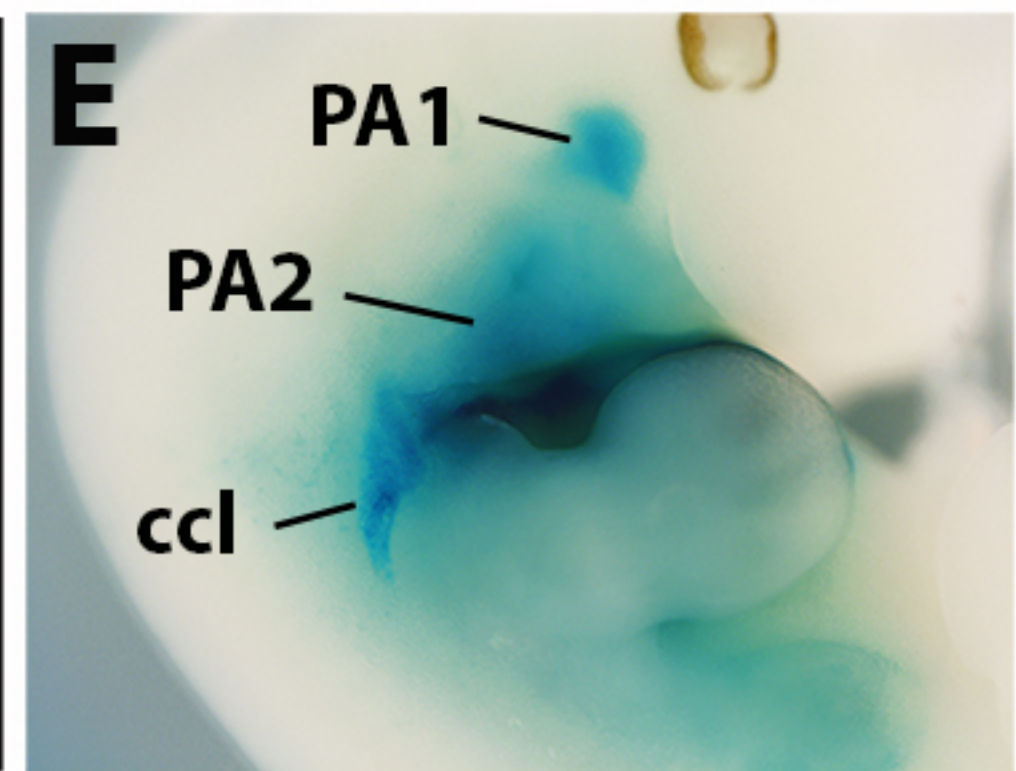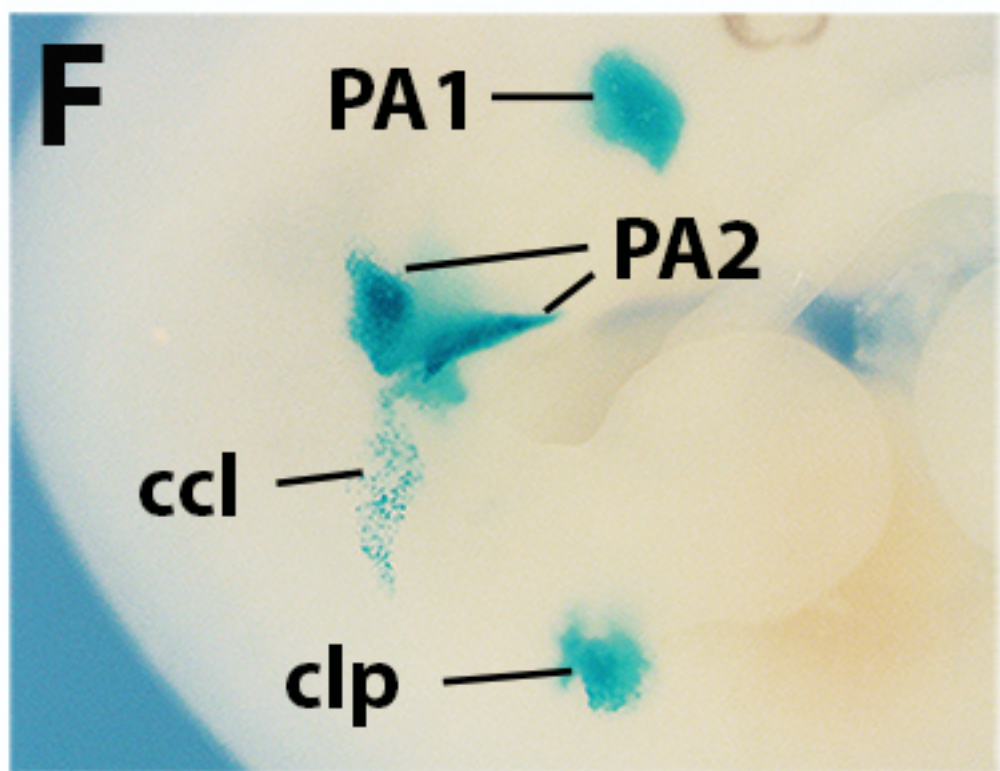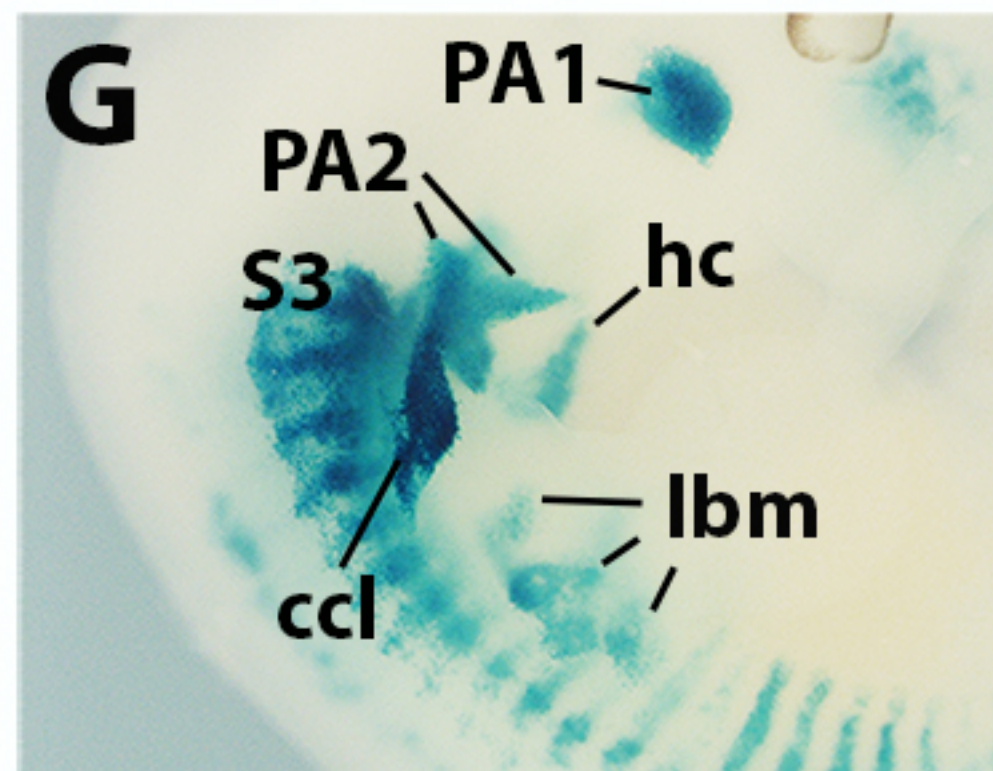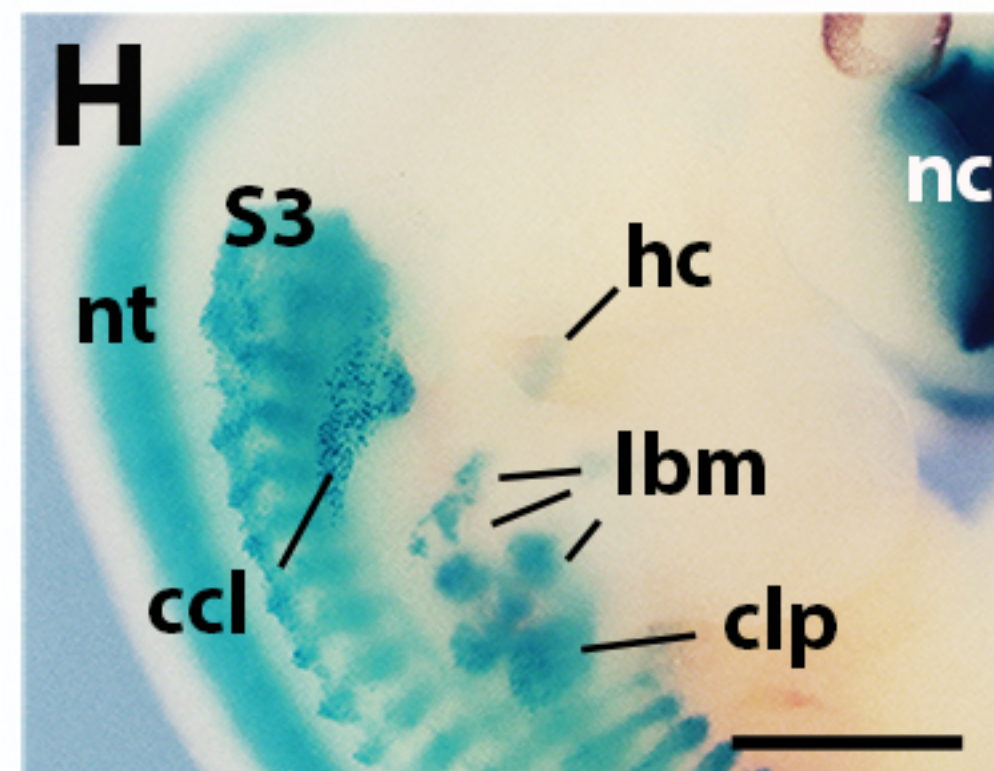

**E18.5**

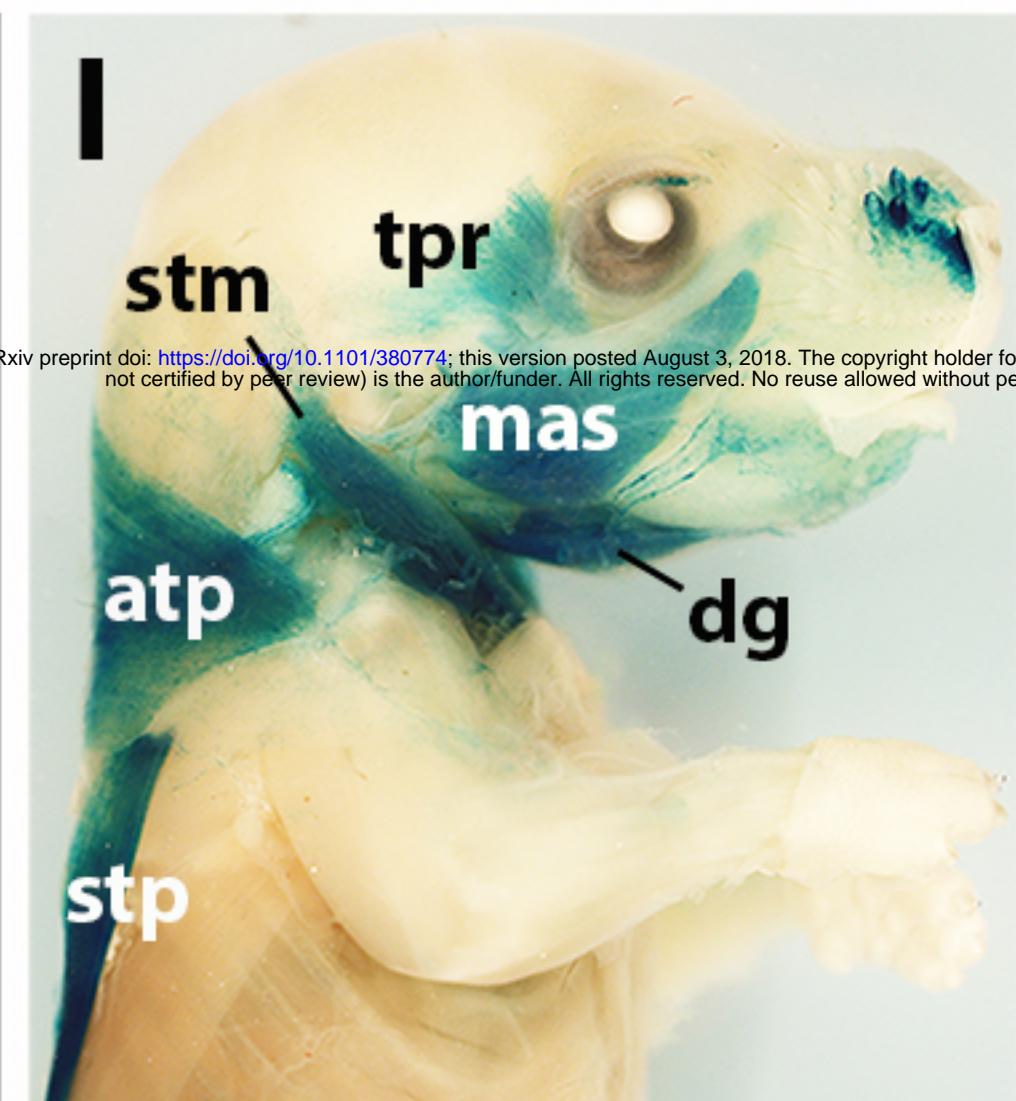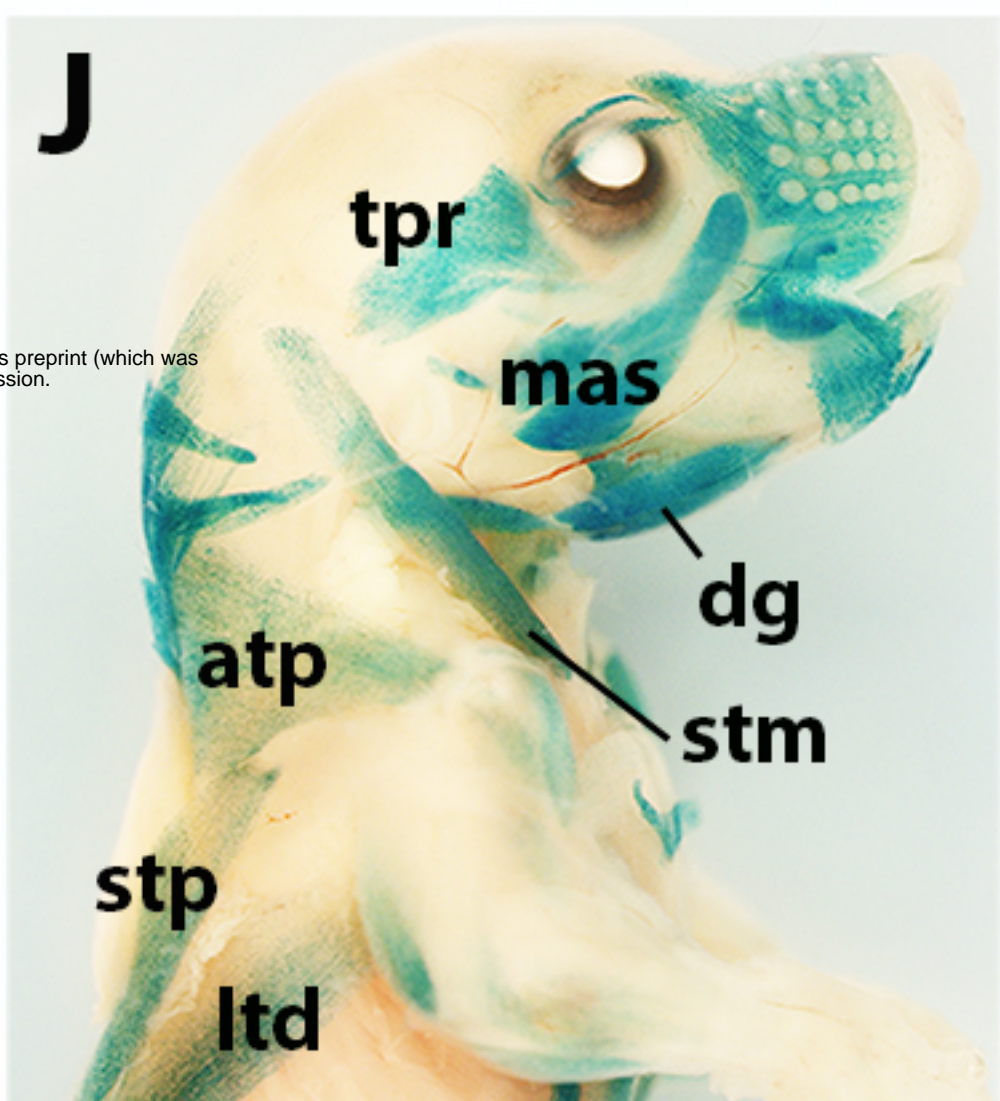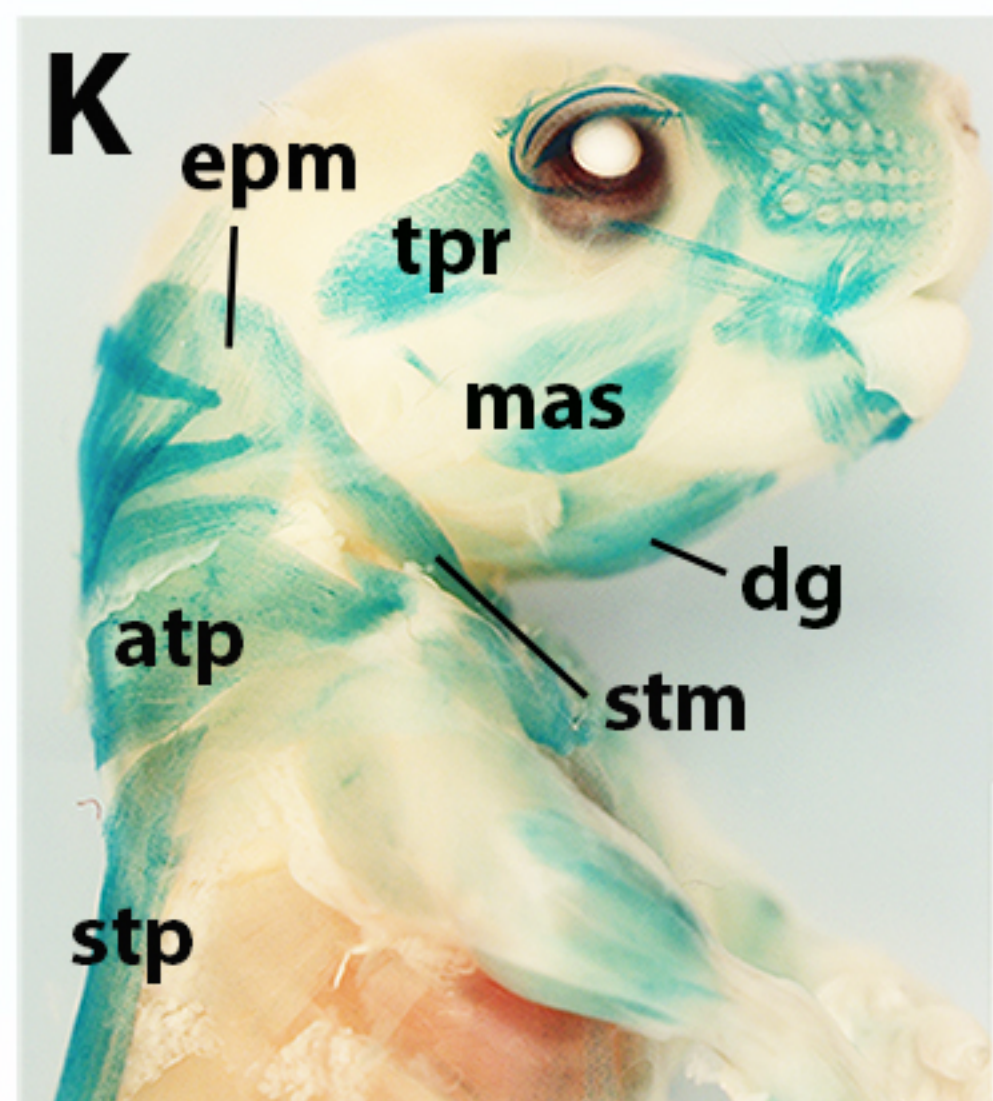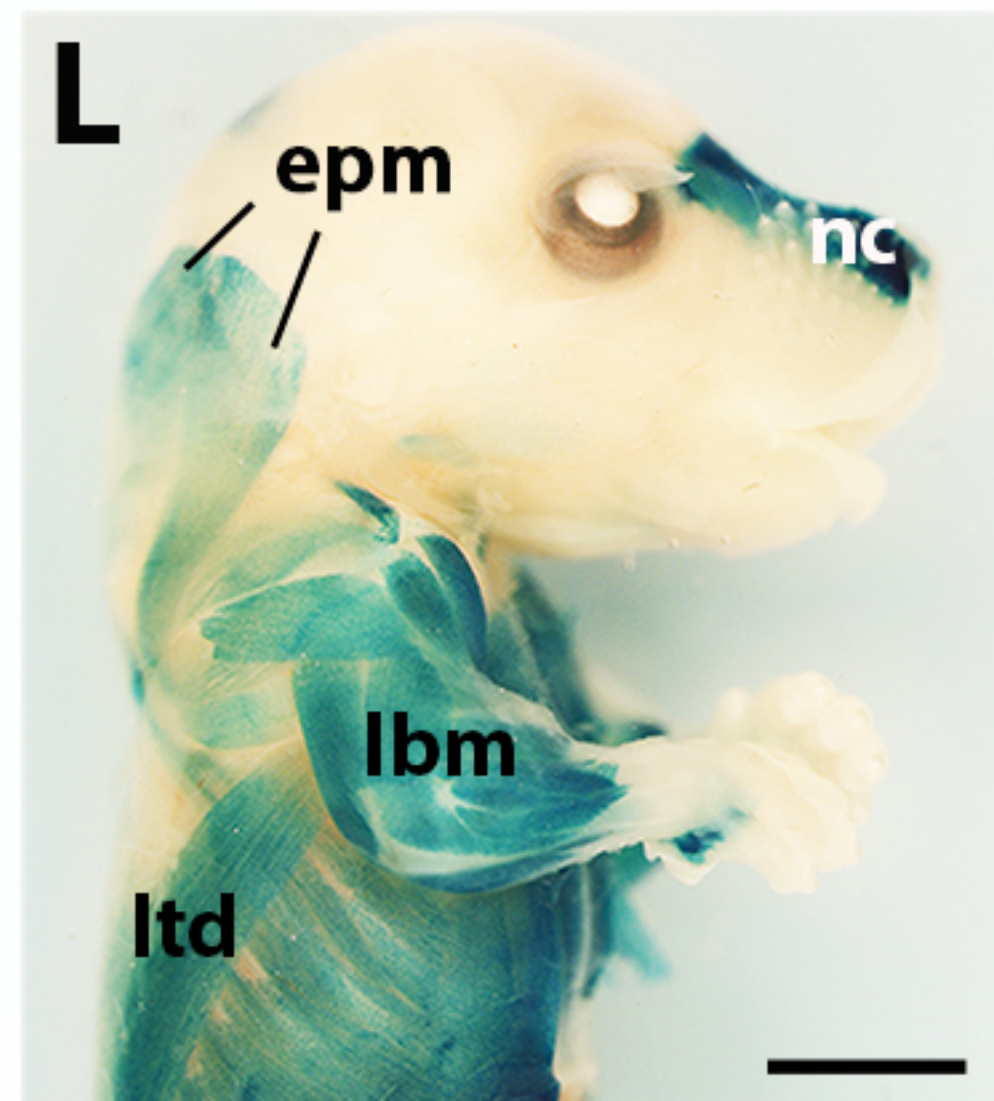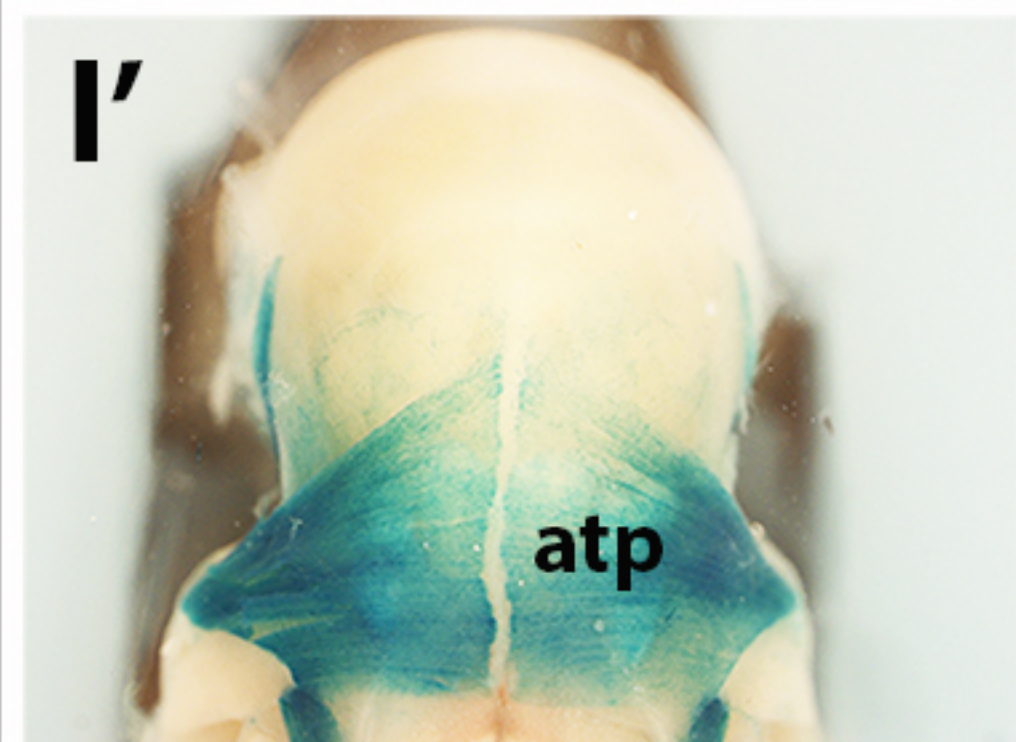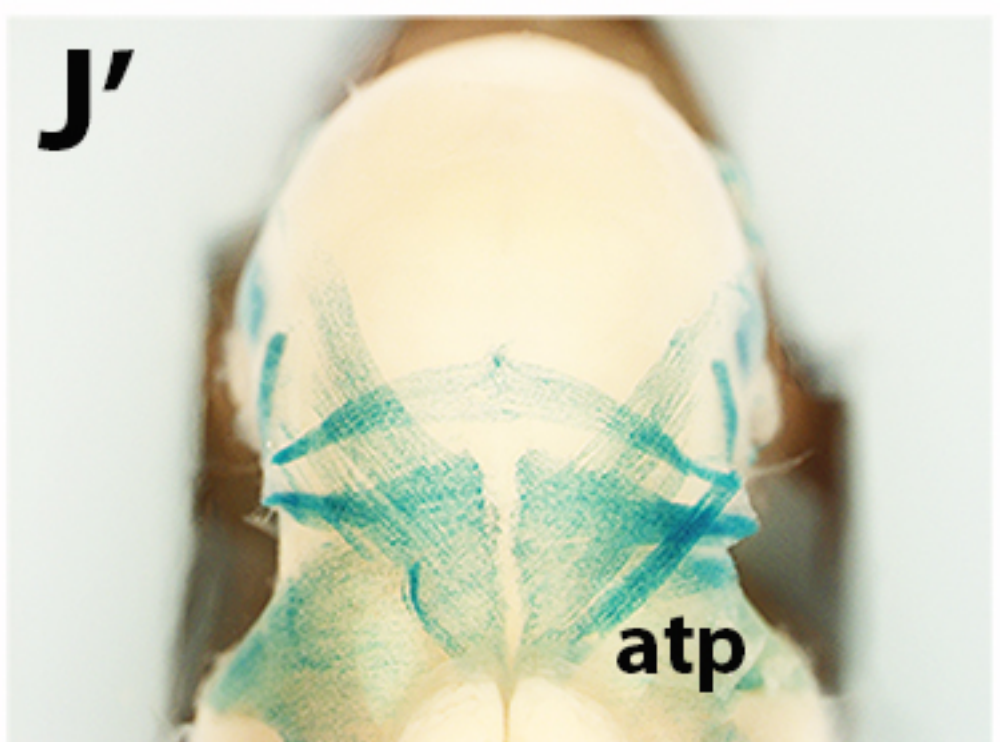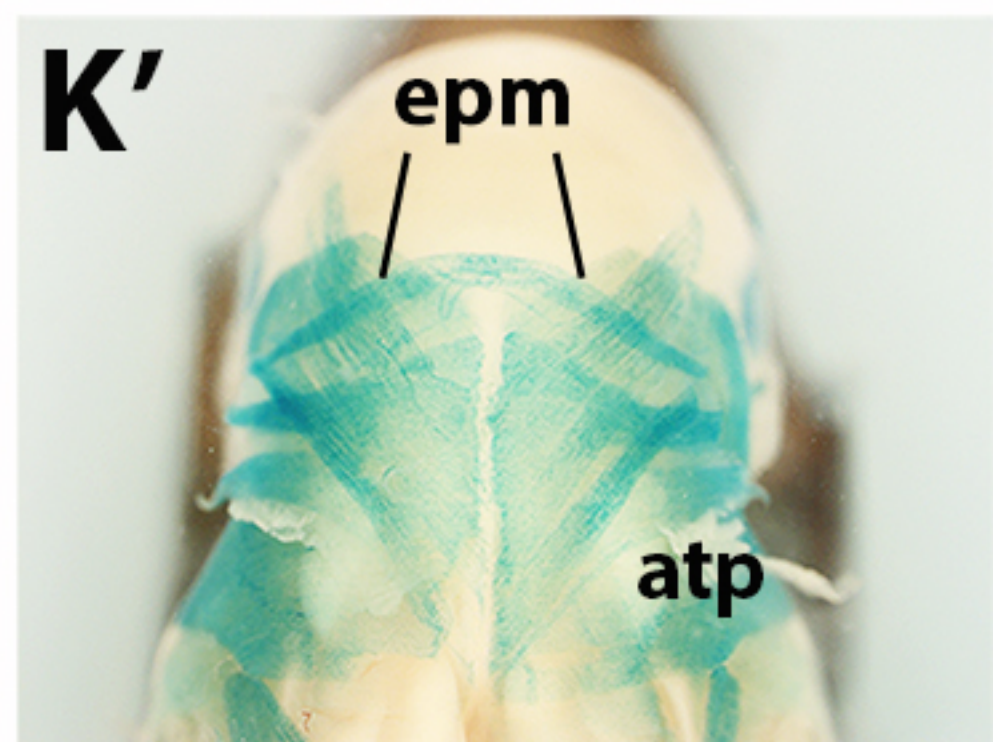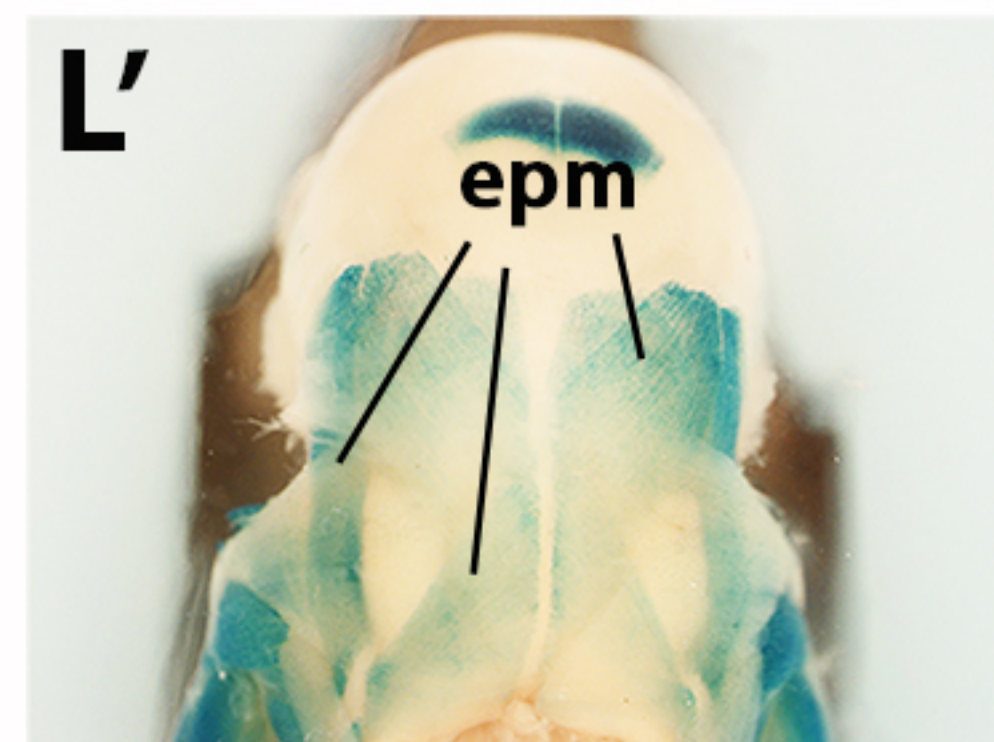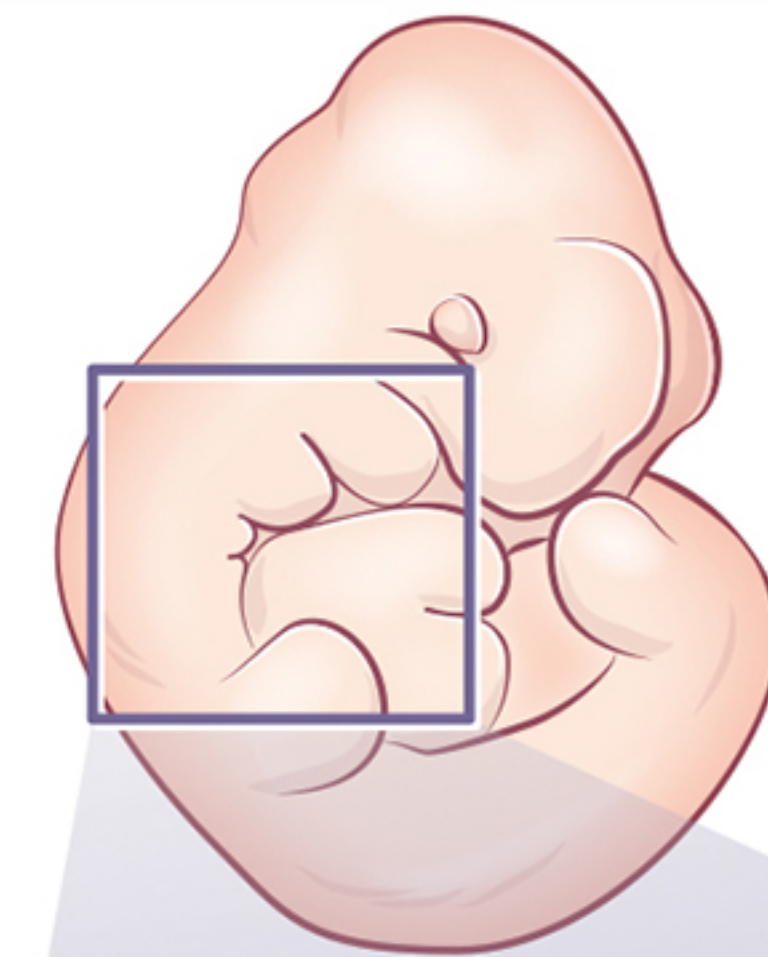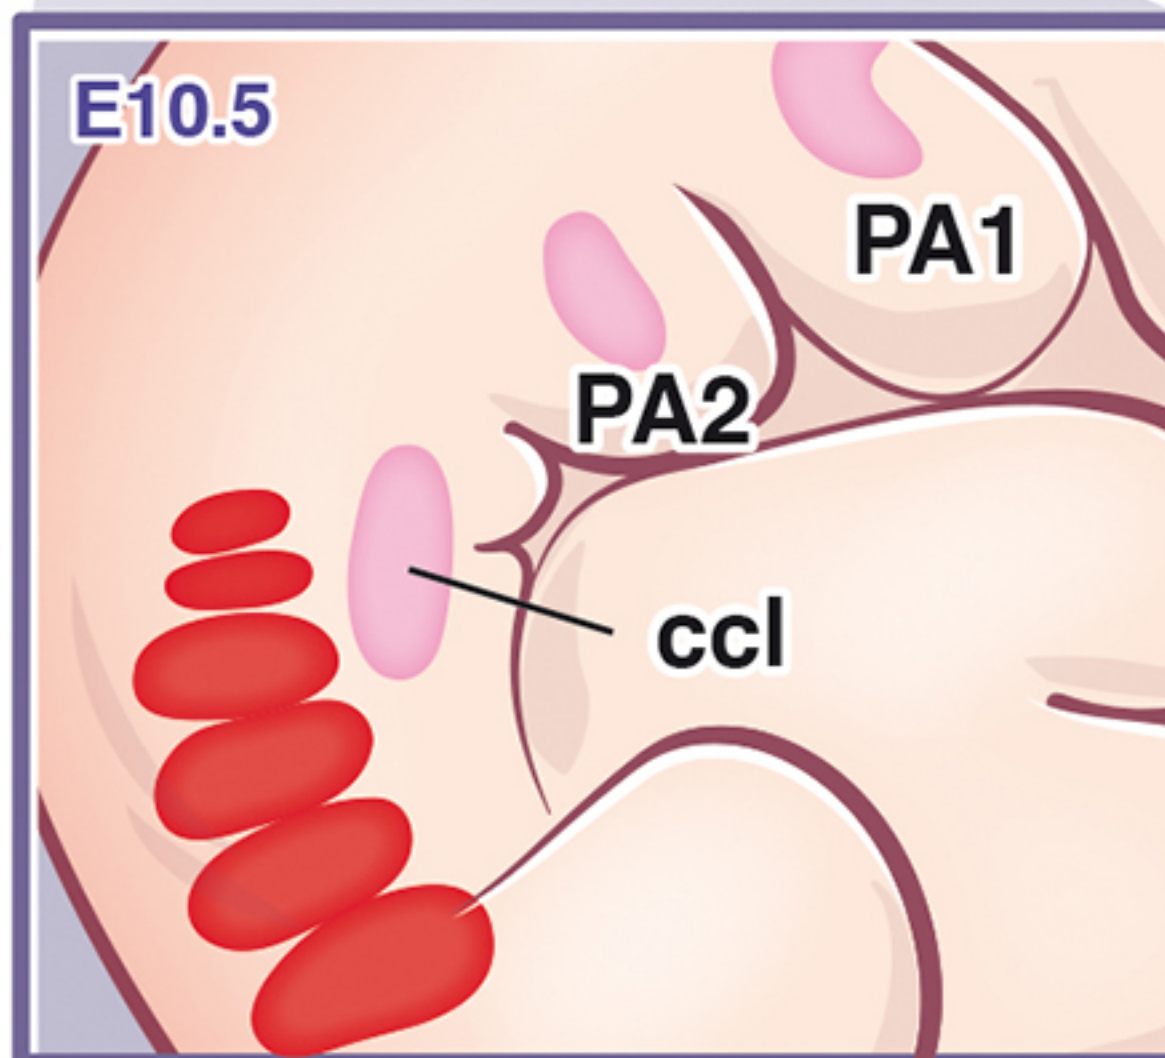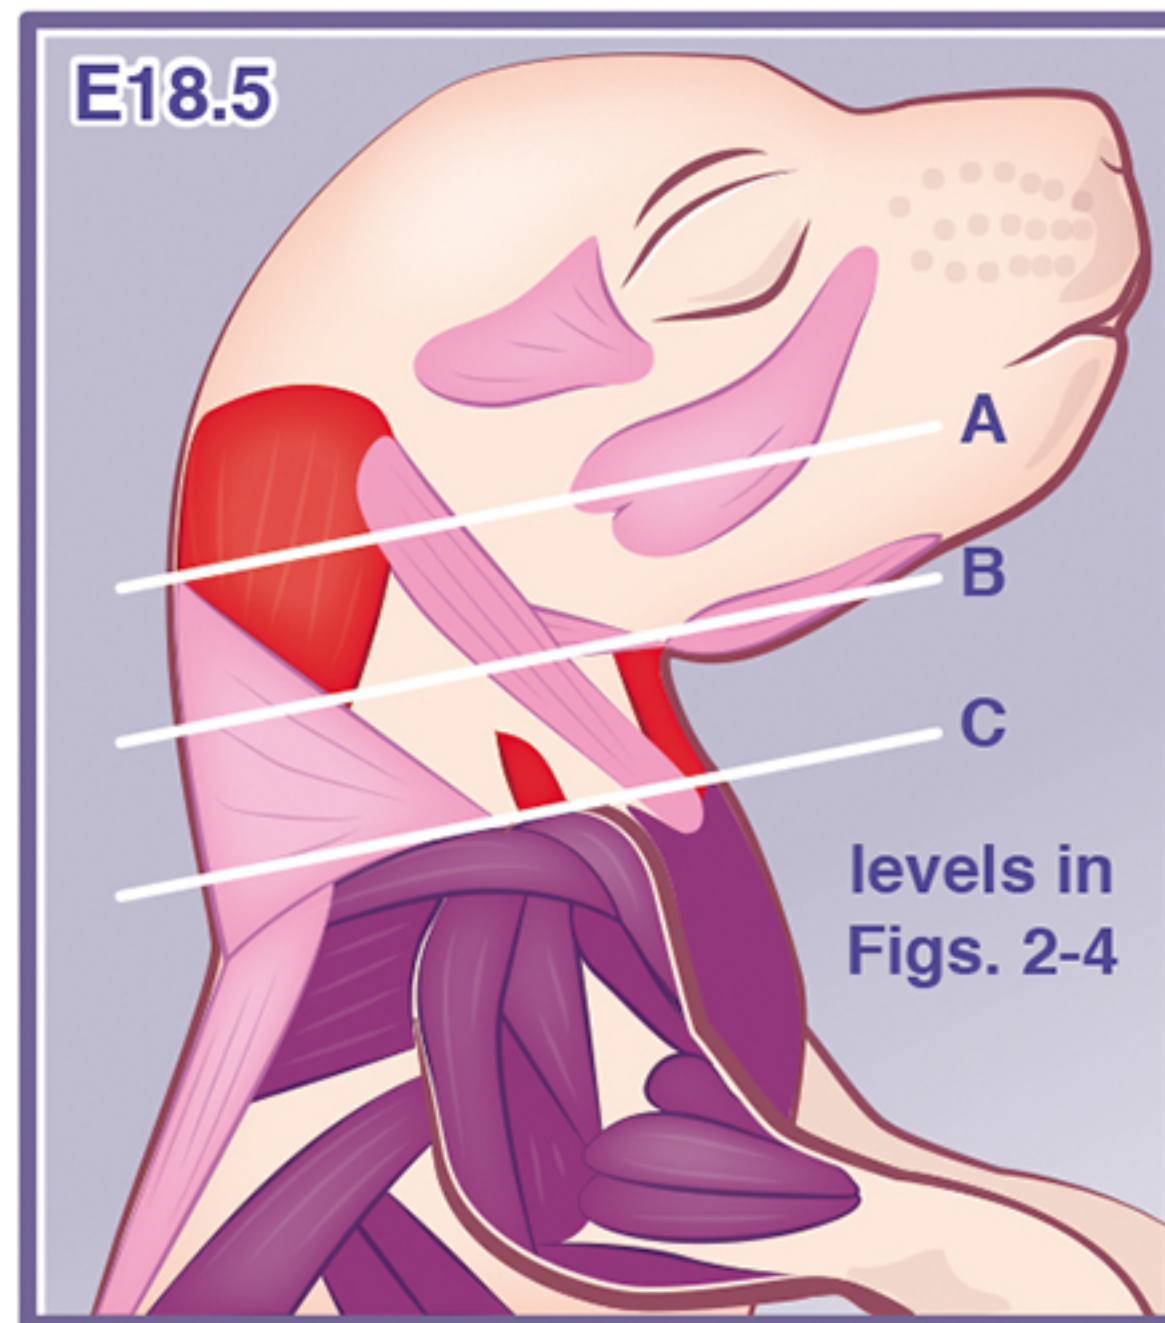

**Myogenic programs**

|                                                                                       |                               |                                                                                       |                   |                                                                                       |             |
|---------------------------------------------------------------------------------------|-------------------------------|---------------------------------------------------------------------------------------|-------------------|---------------------------------------------------------------------------------------|-------------|
|  | <i>Mef2c-AHF/Islet1/Mesp1</i> |  | <i>Mesp1/Pax3</i> |  | <i>Pax3</i> |
|---------------------------------------------------------------------------------------|-------------------------------|---------------------------------------------------------------------------------------|-------------------|---------------------------------------------------------------------------------------|-------------|

**Figure 1**

*Mesp1*<sup>Cre</sup>; R26<sup>tdTomato</sup>

*Pax3*<sup>Cre</sup>; R26<sup>tdTomato</sup>

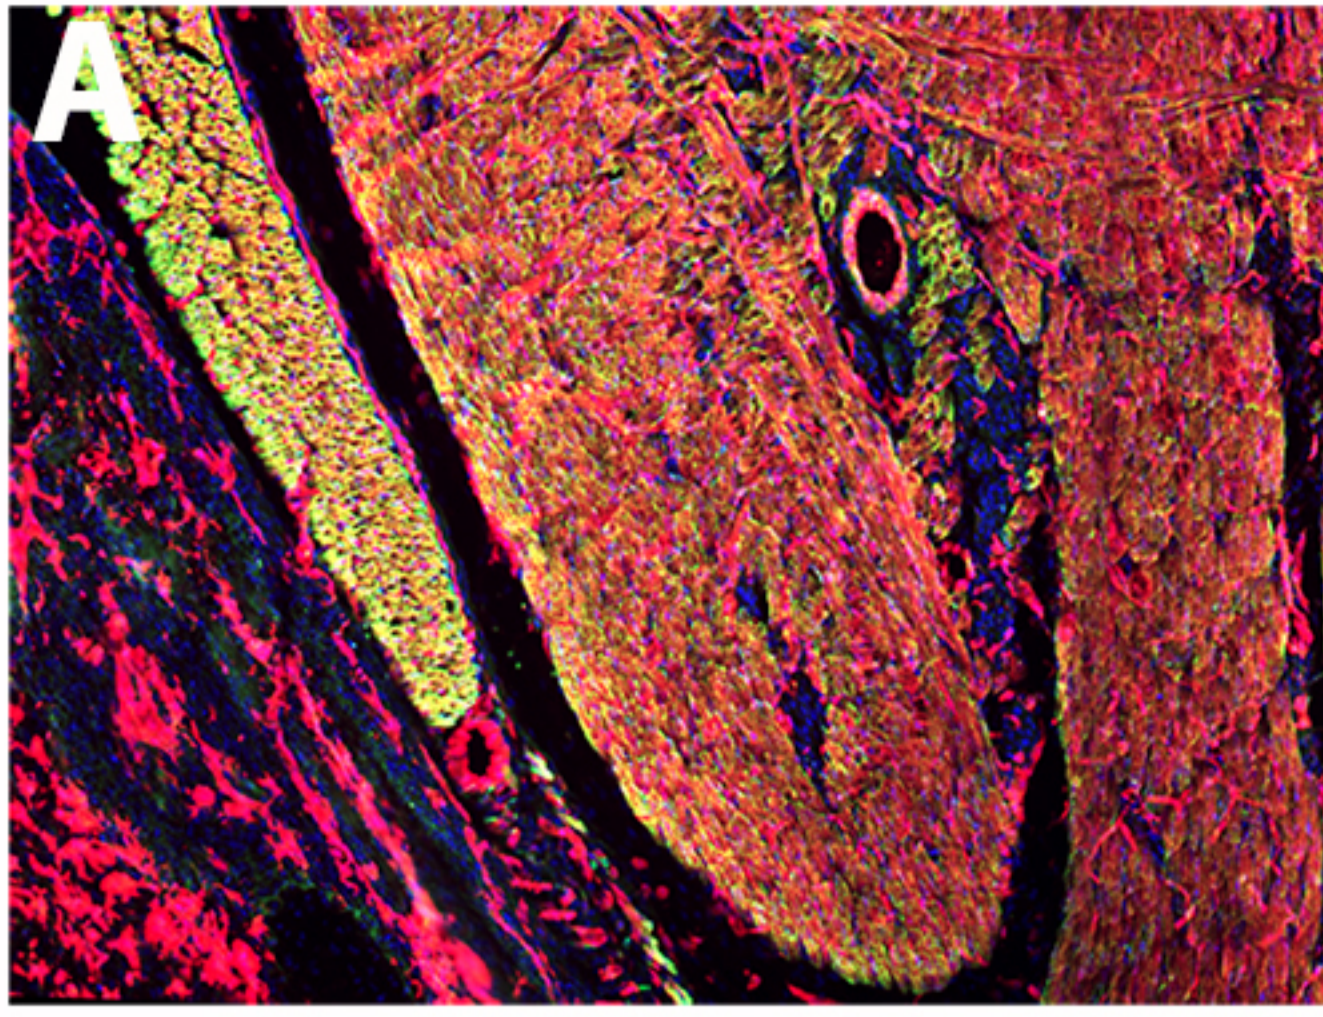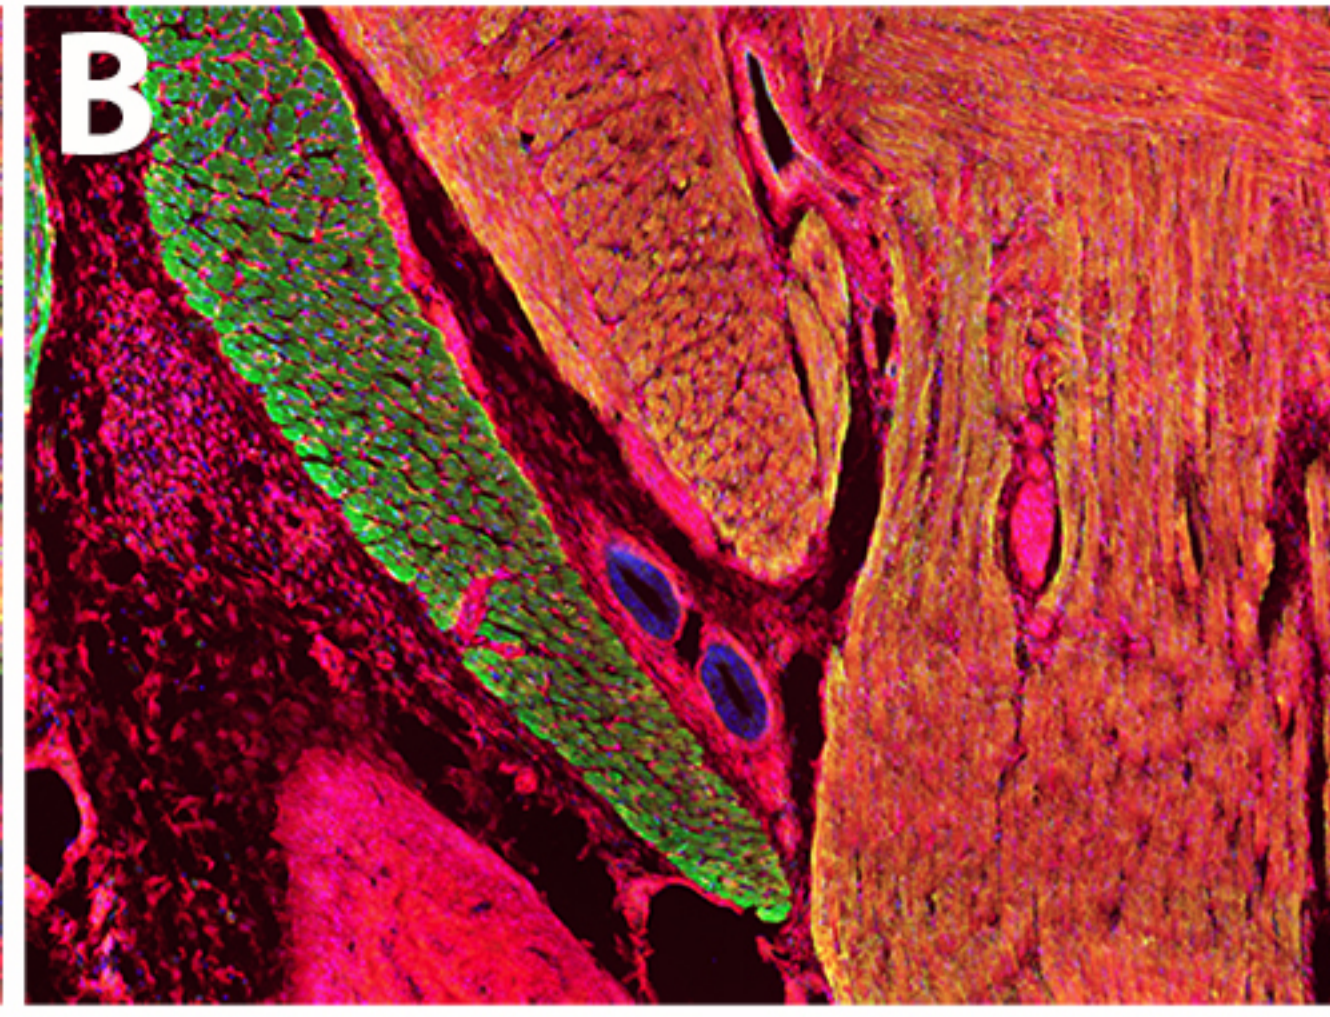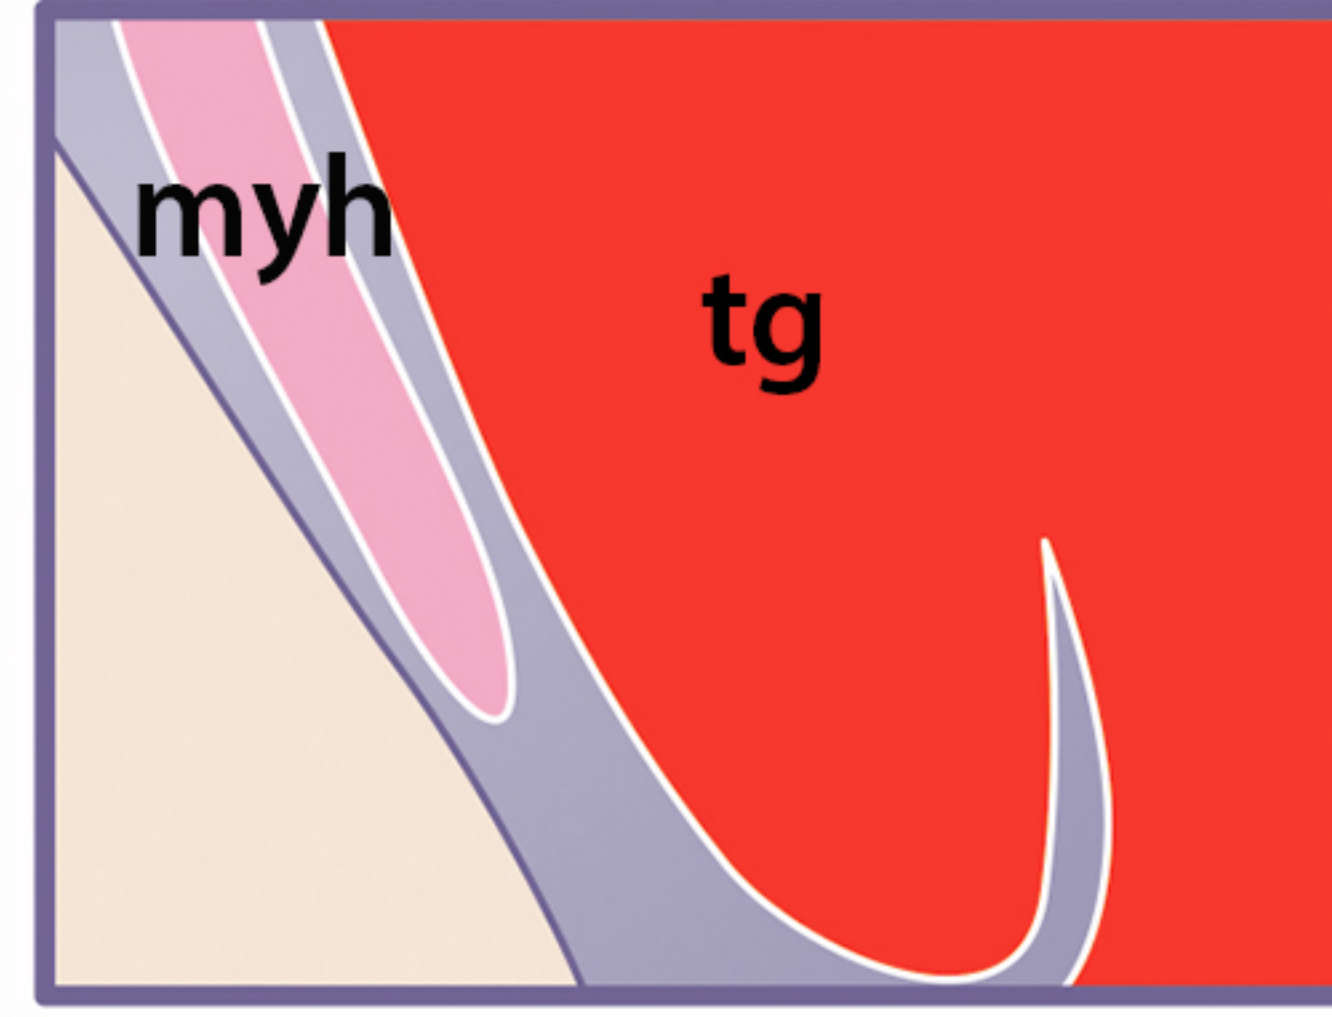

Skeletal components

Fat tissue

Other tissues

Myogenic programs

*Mesp1*

*Mesp1/Pax3*

*Pax3*

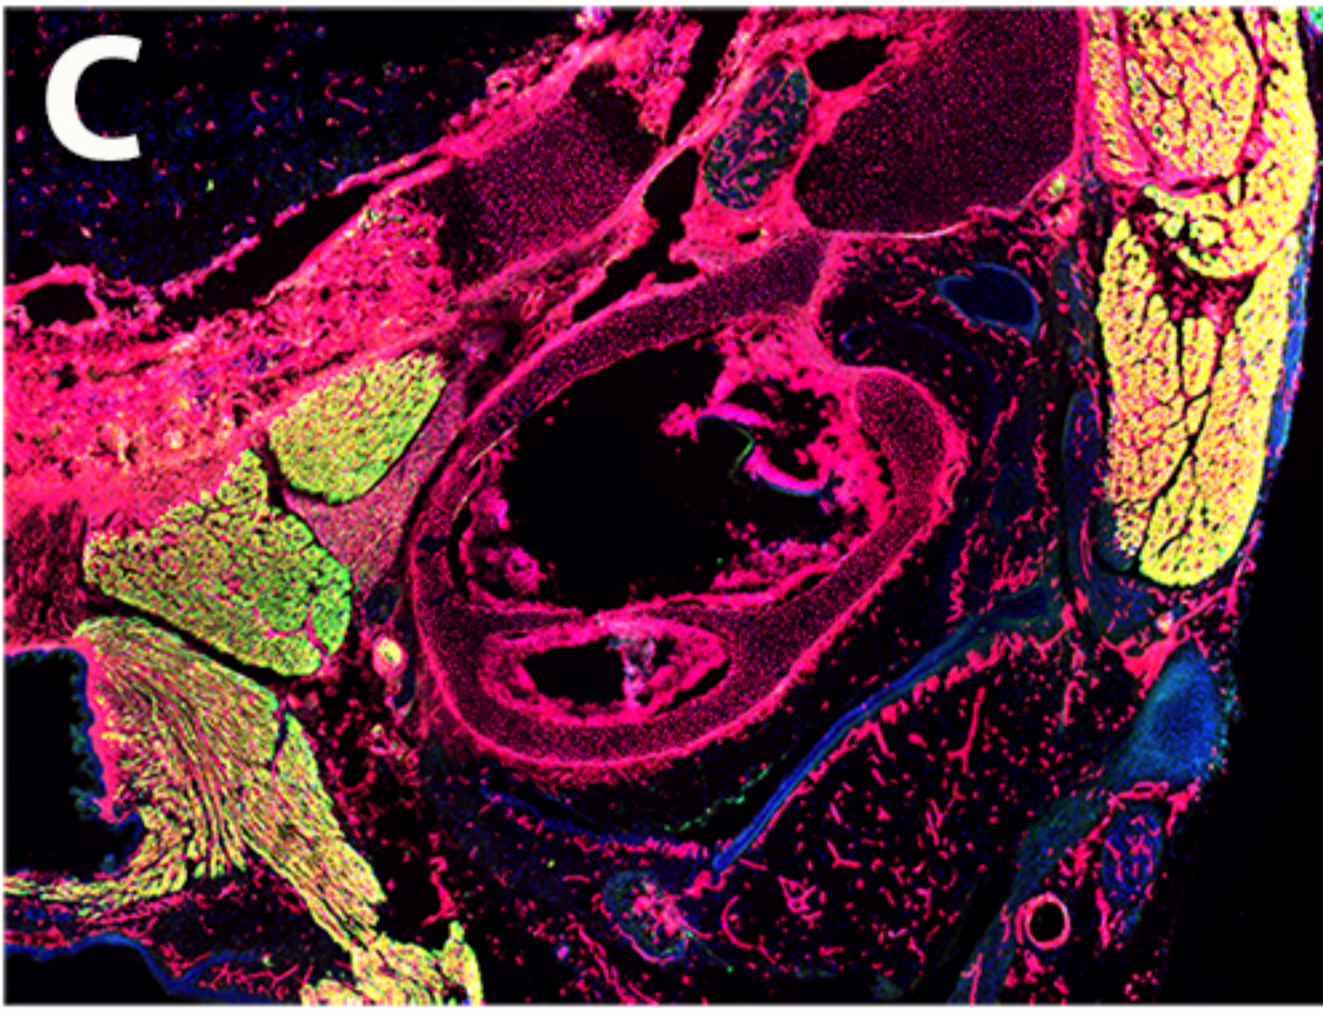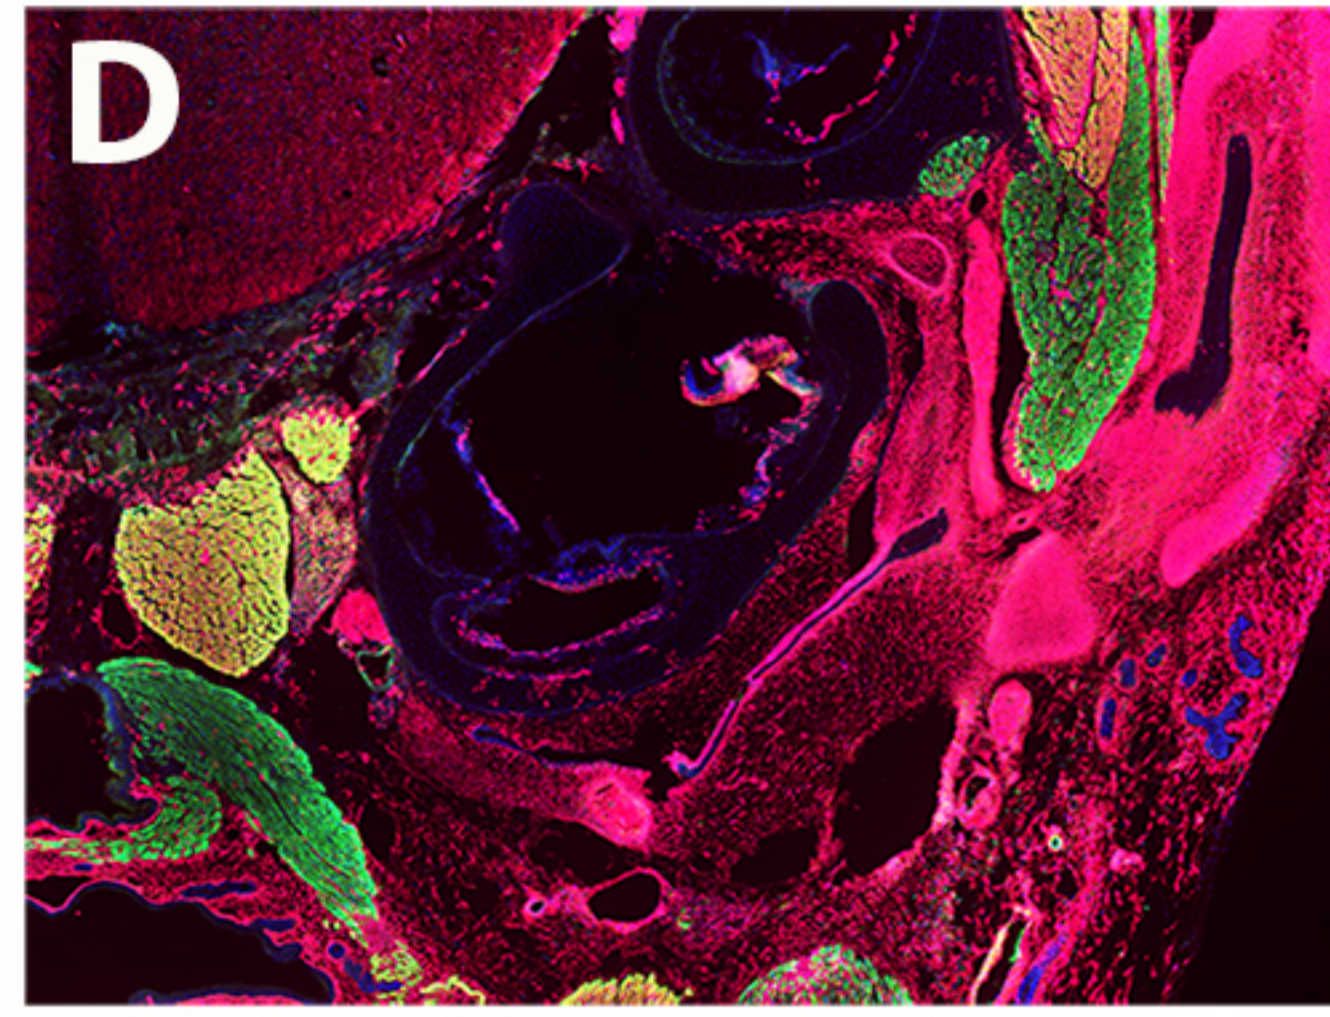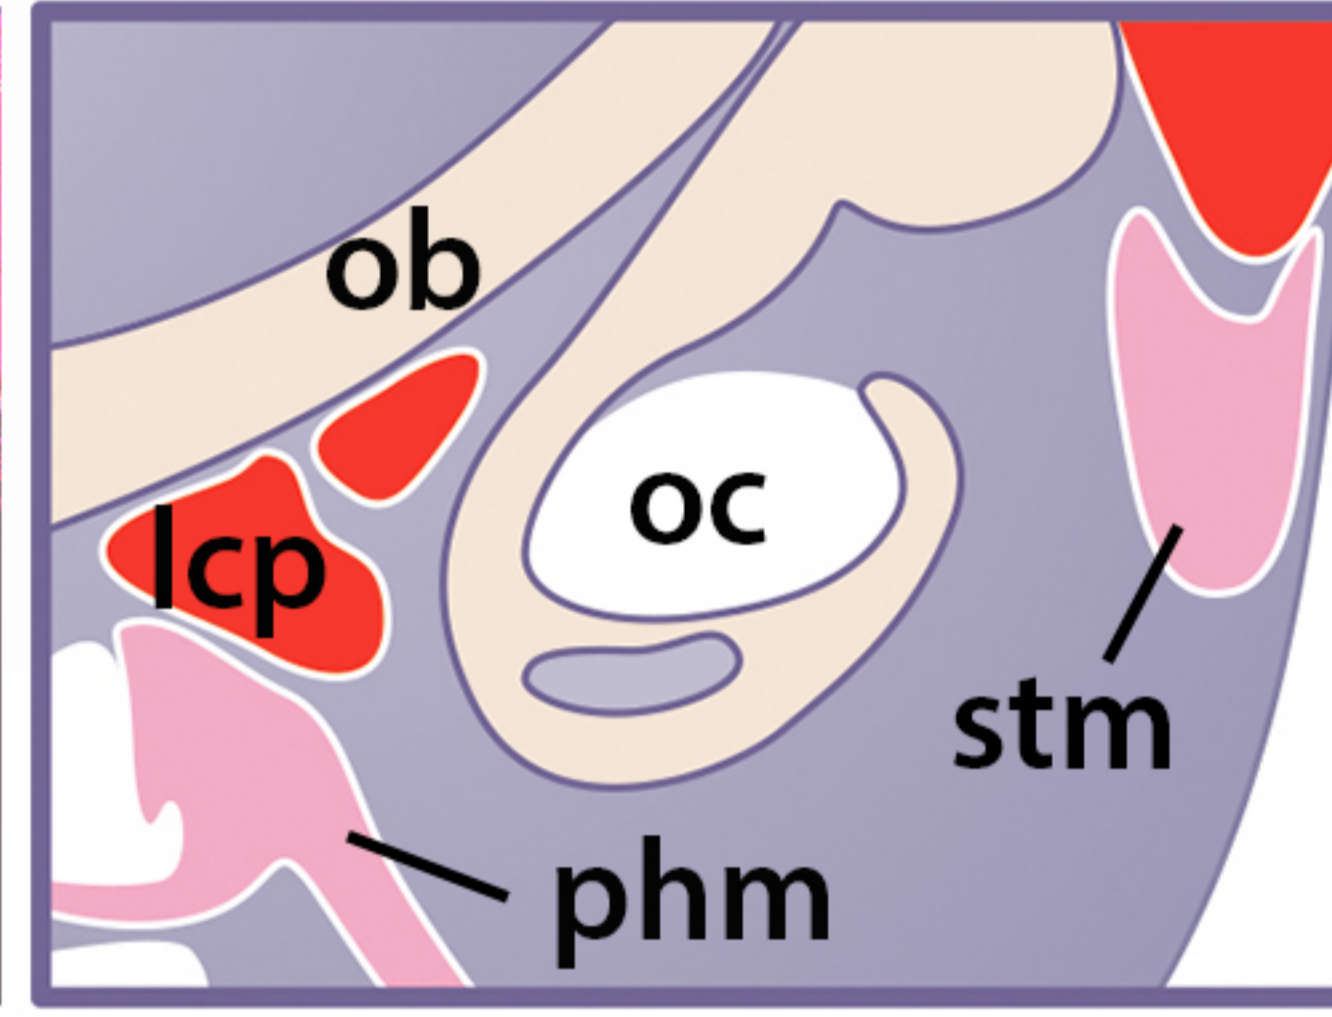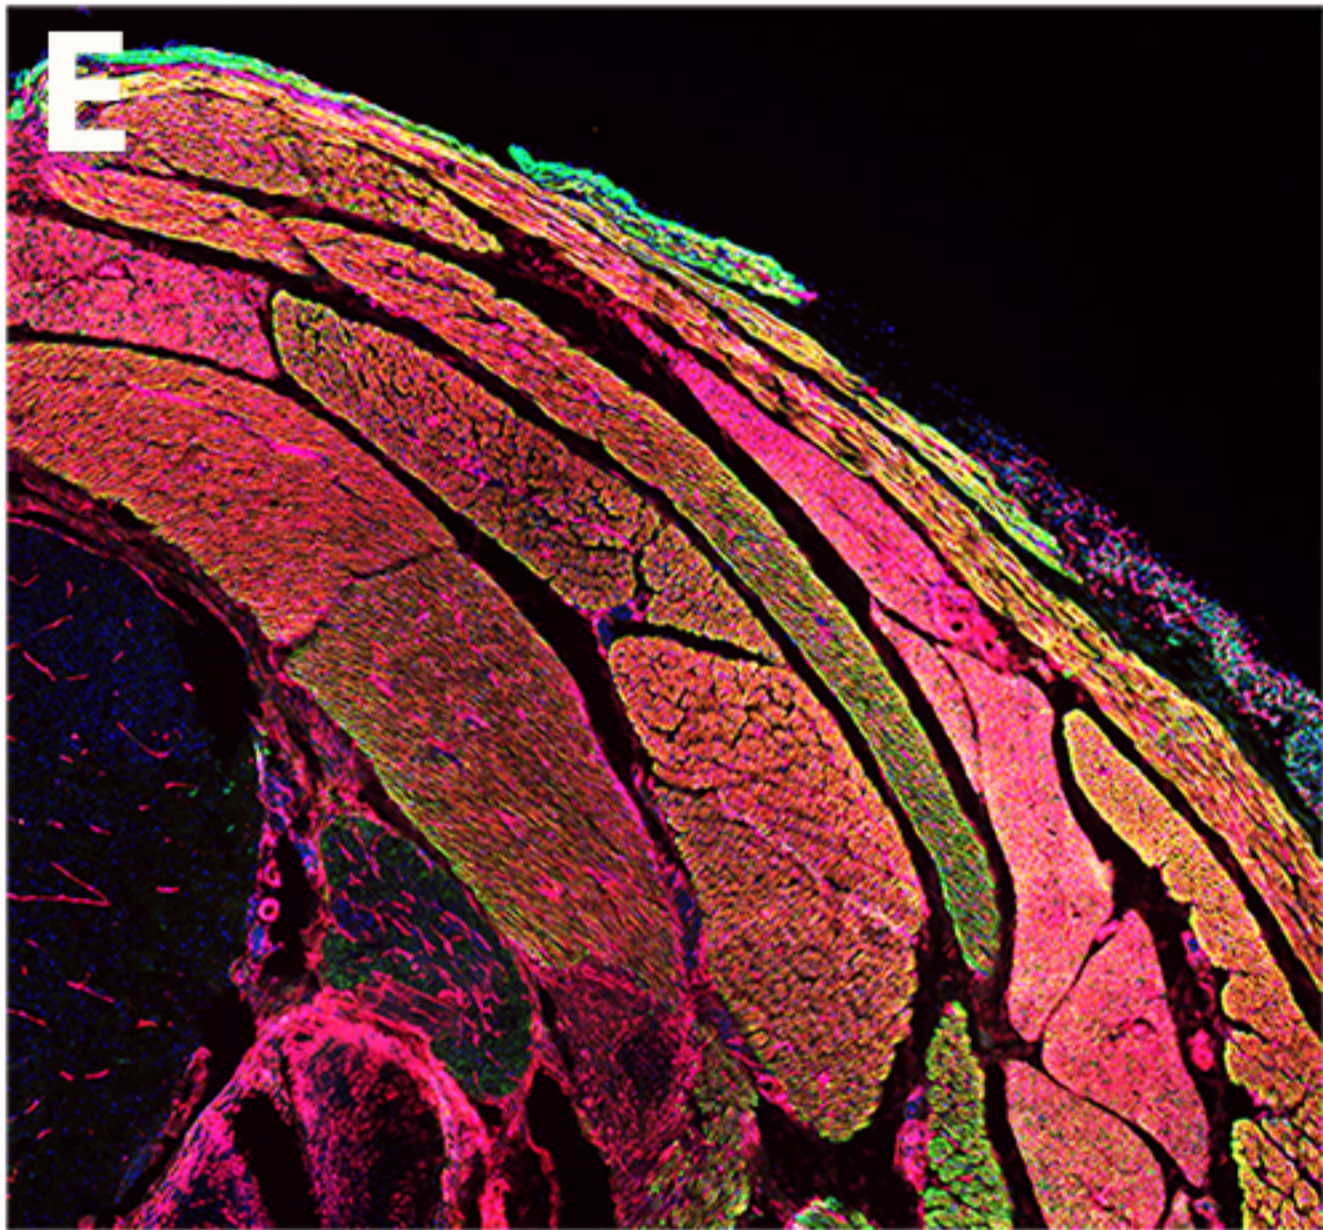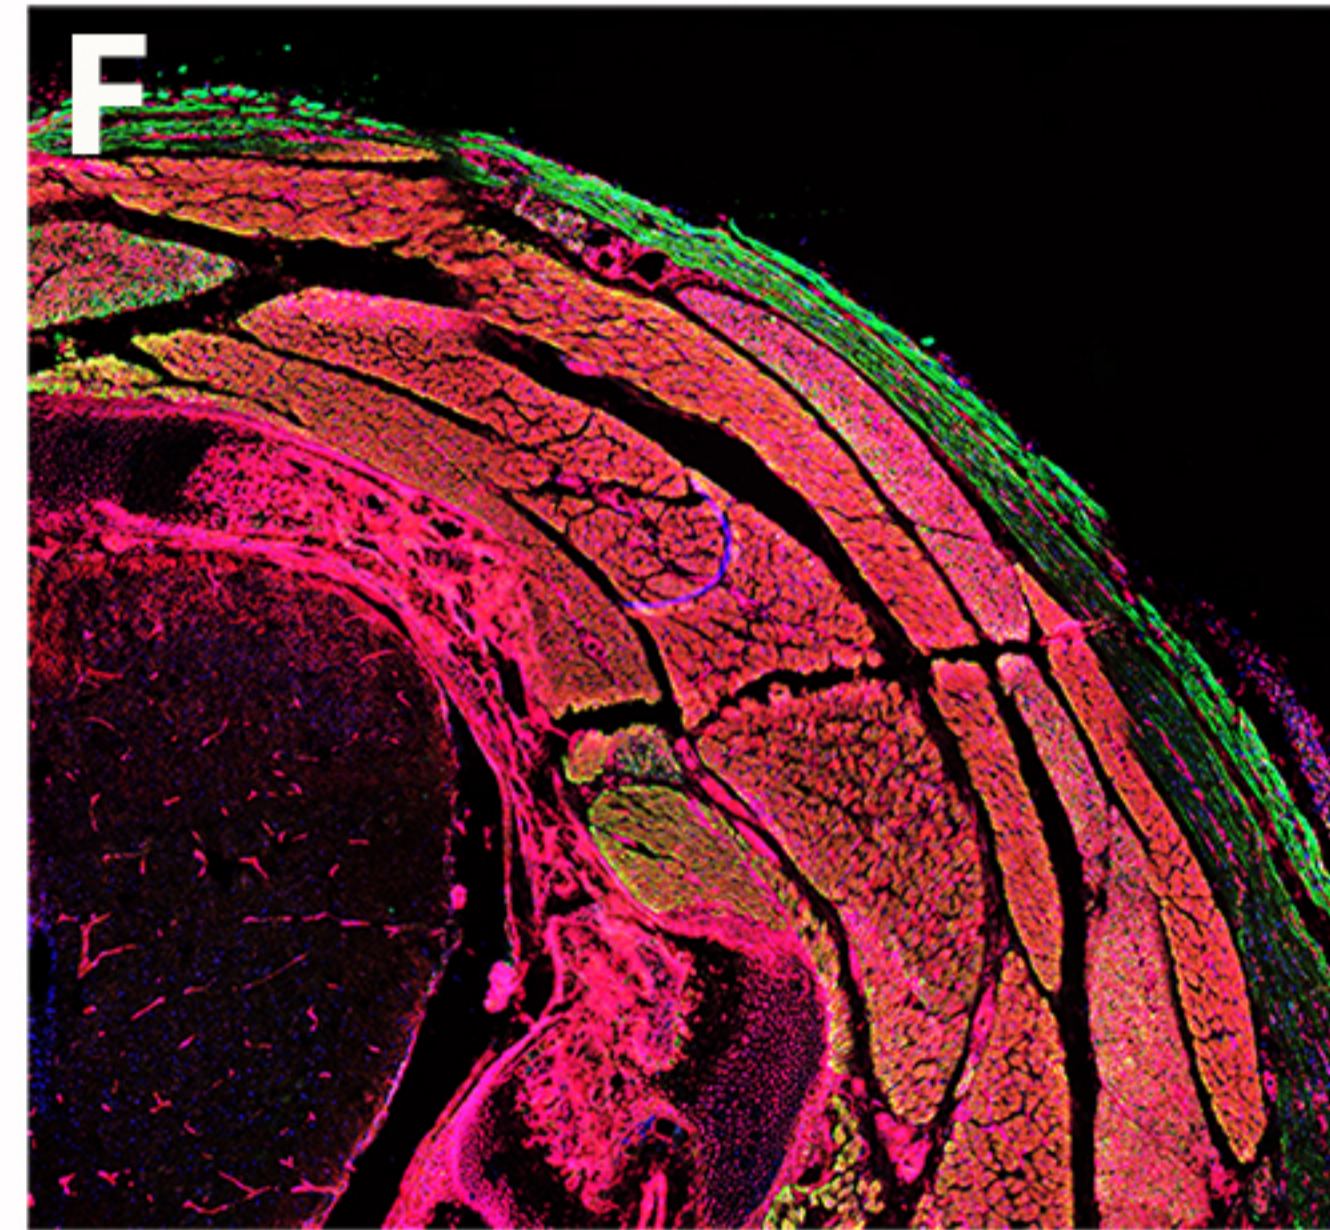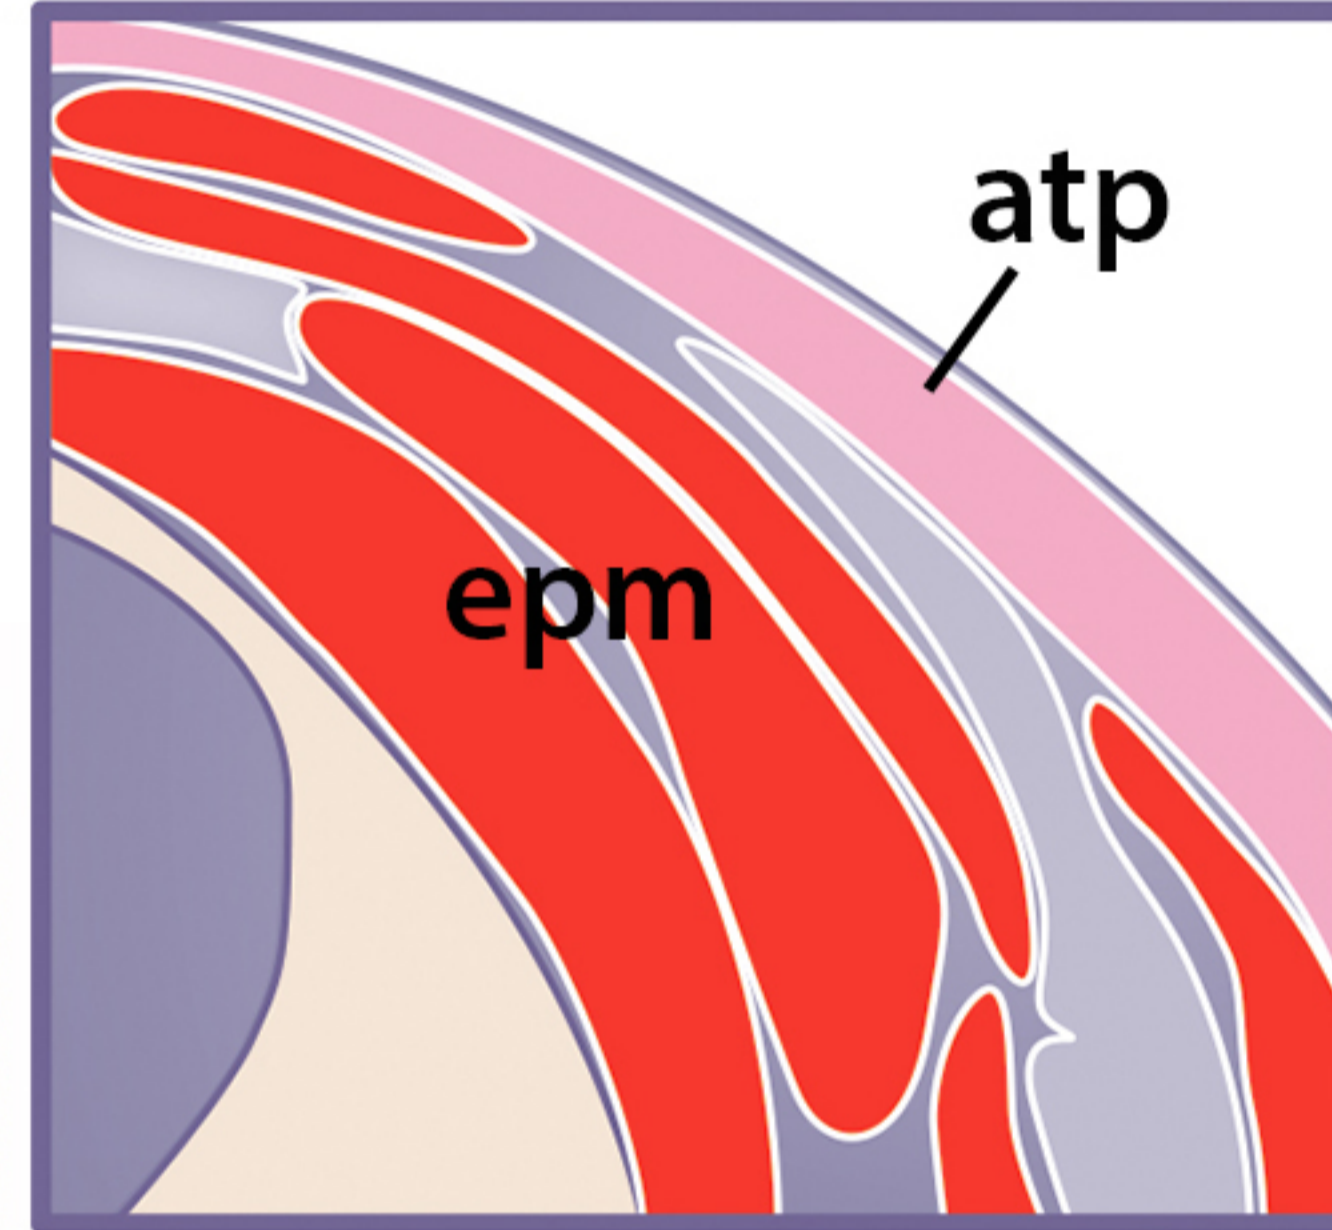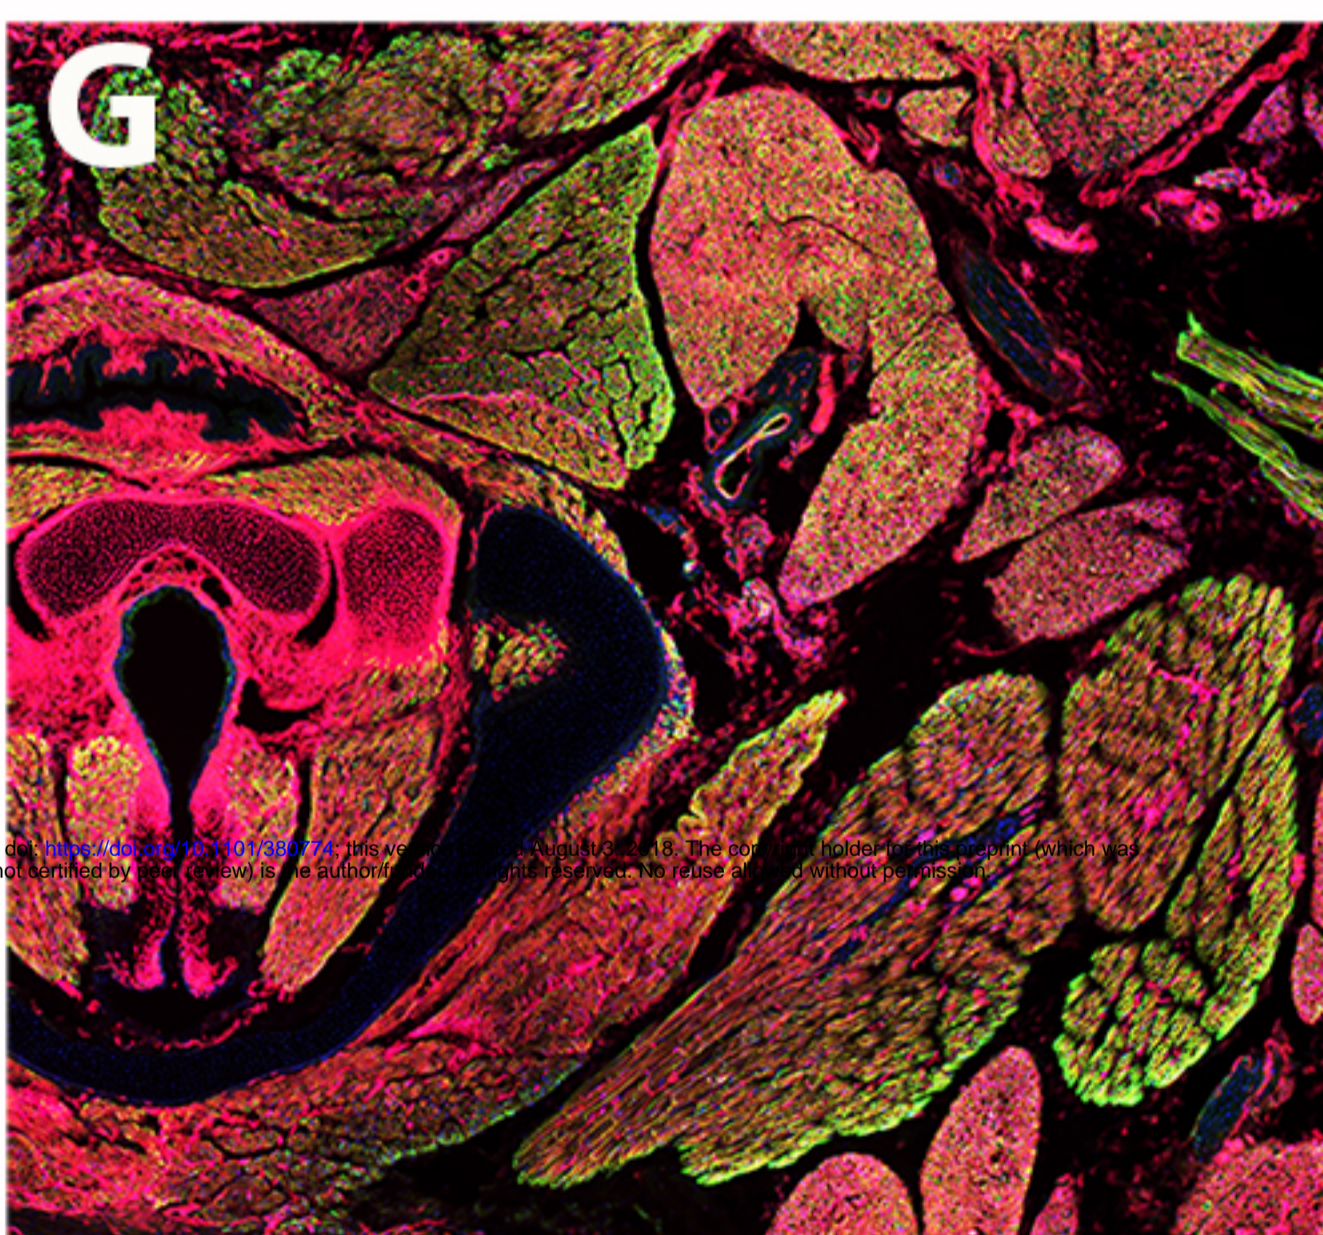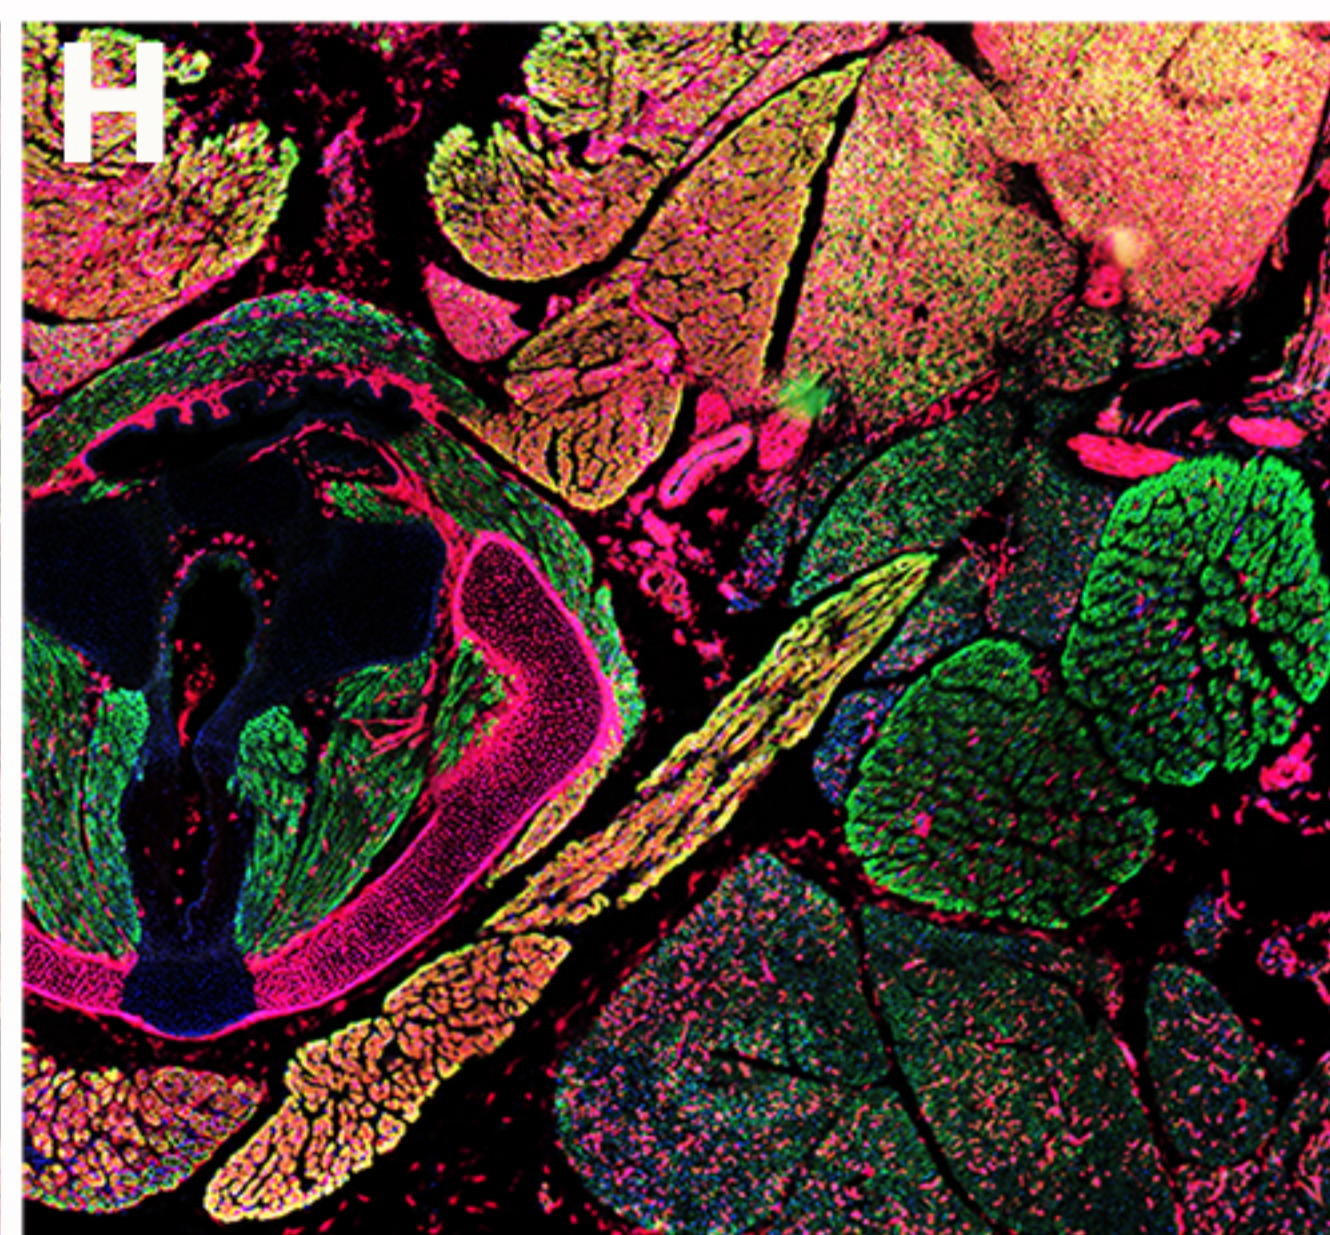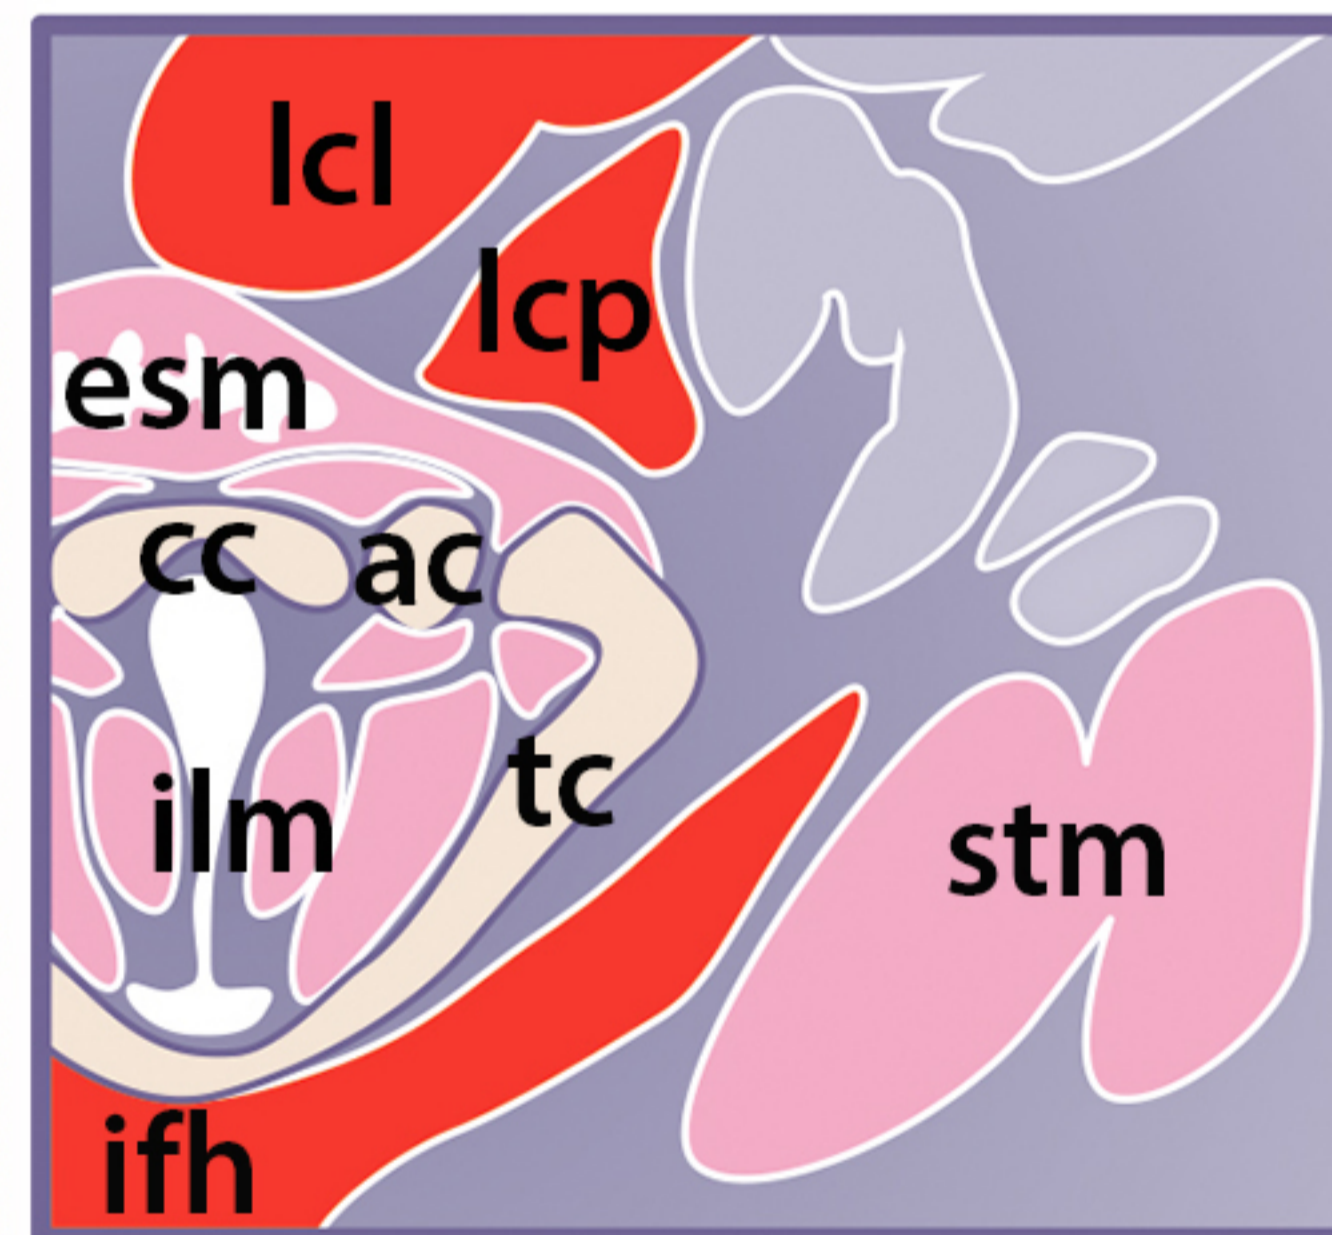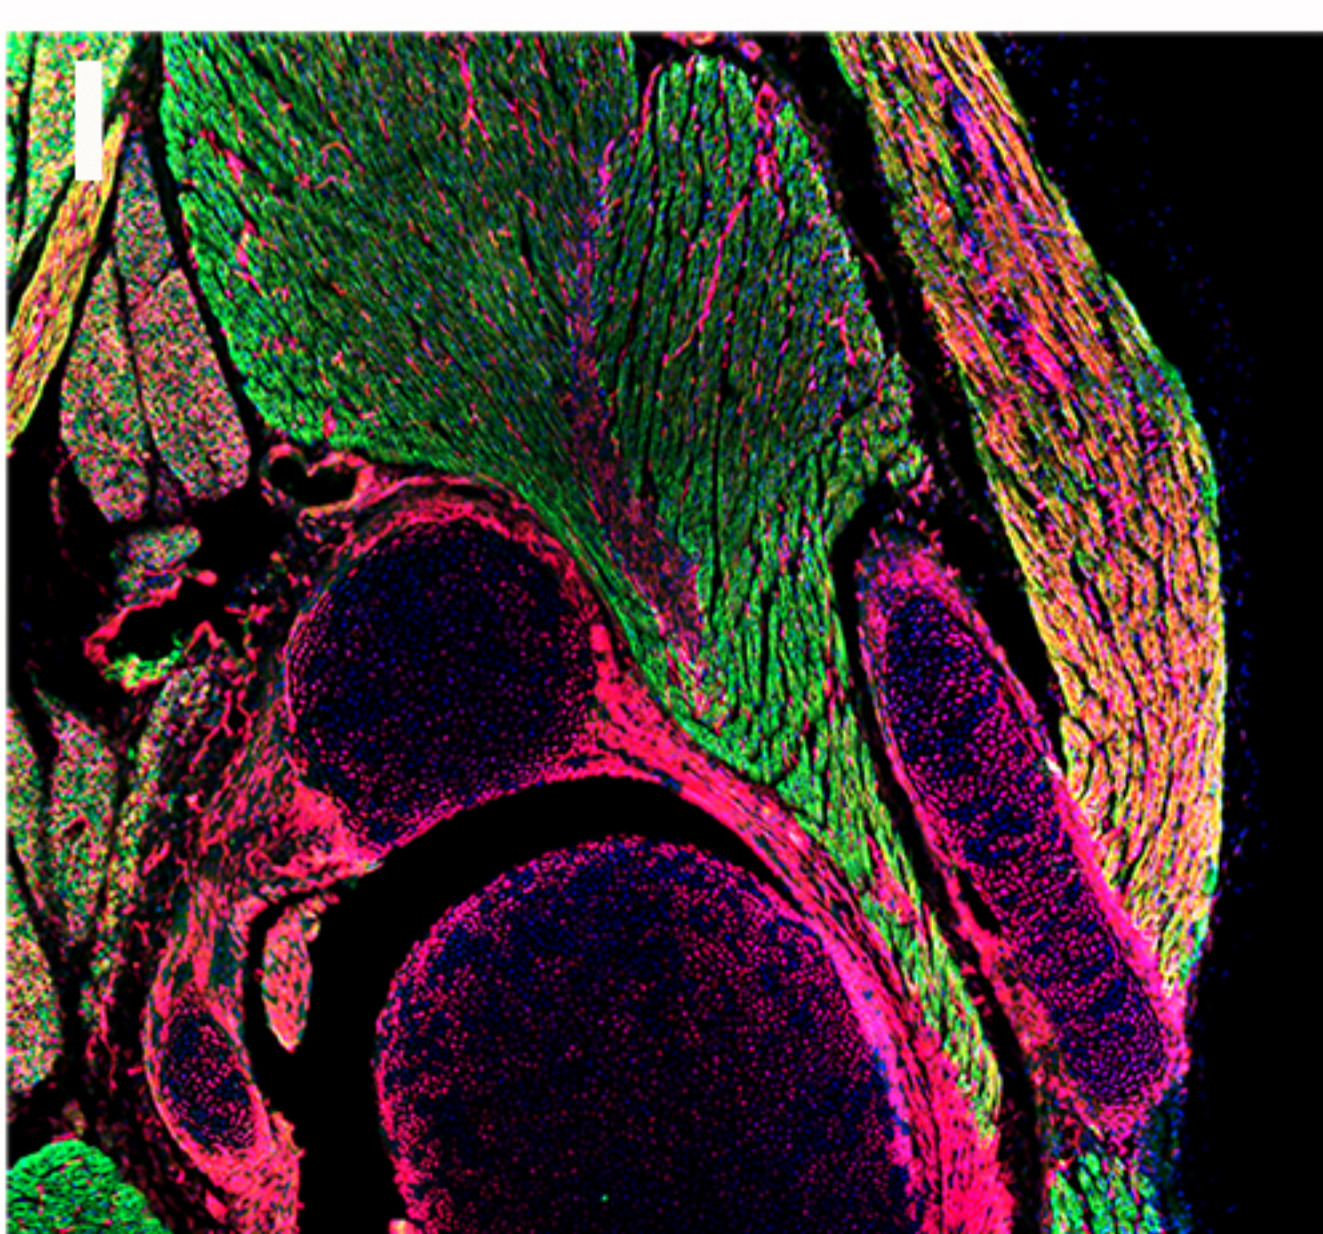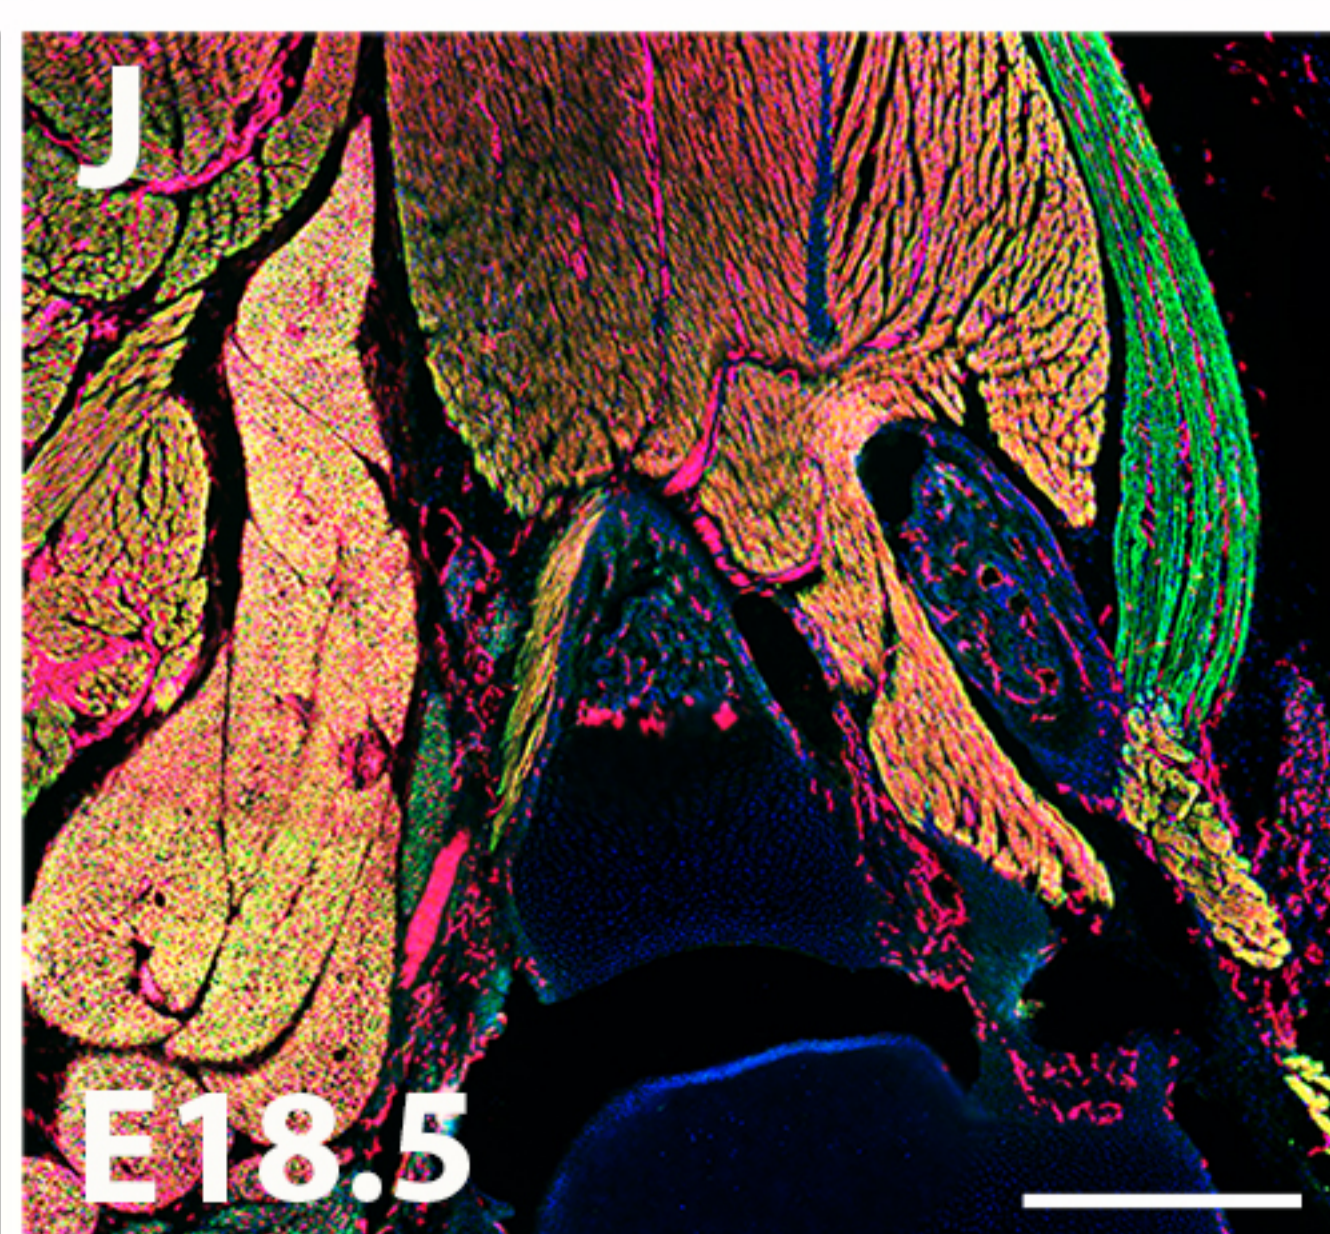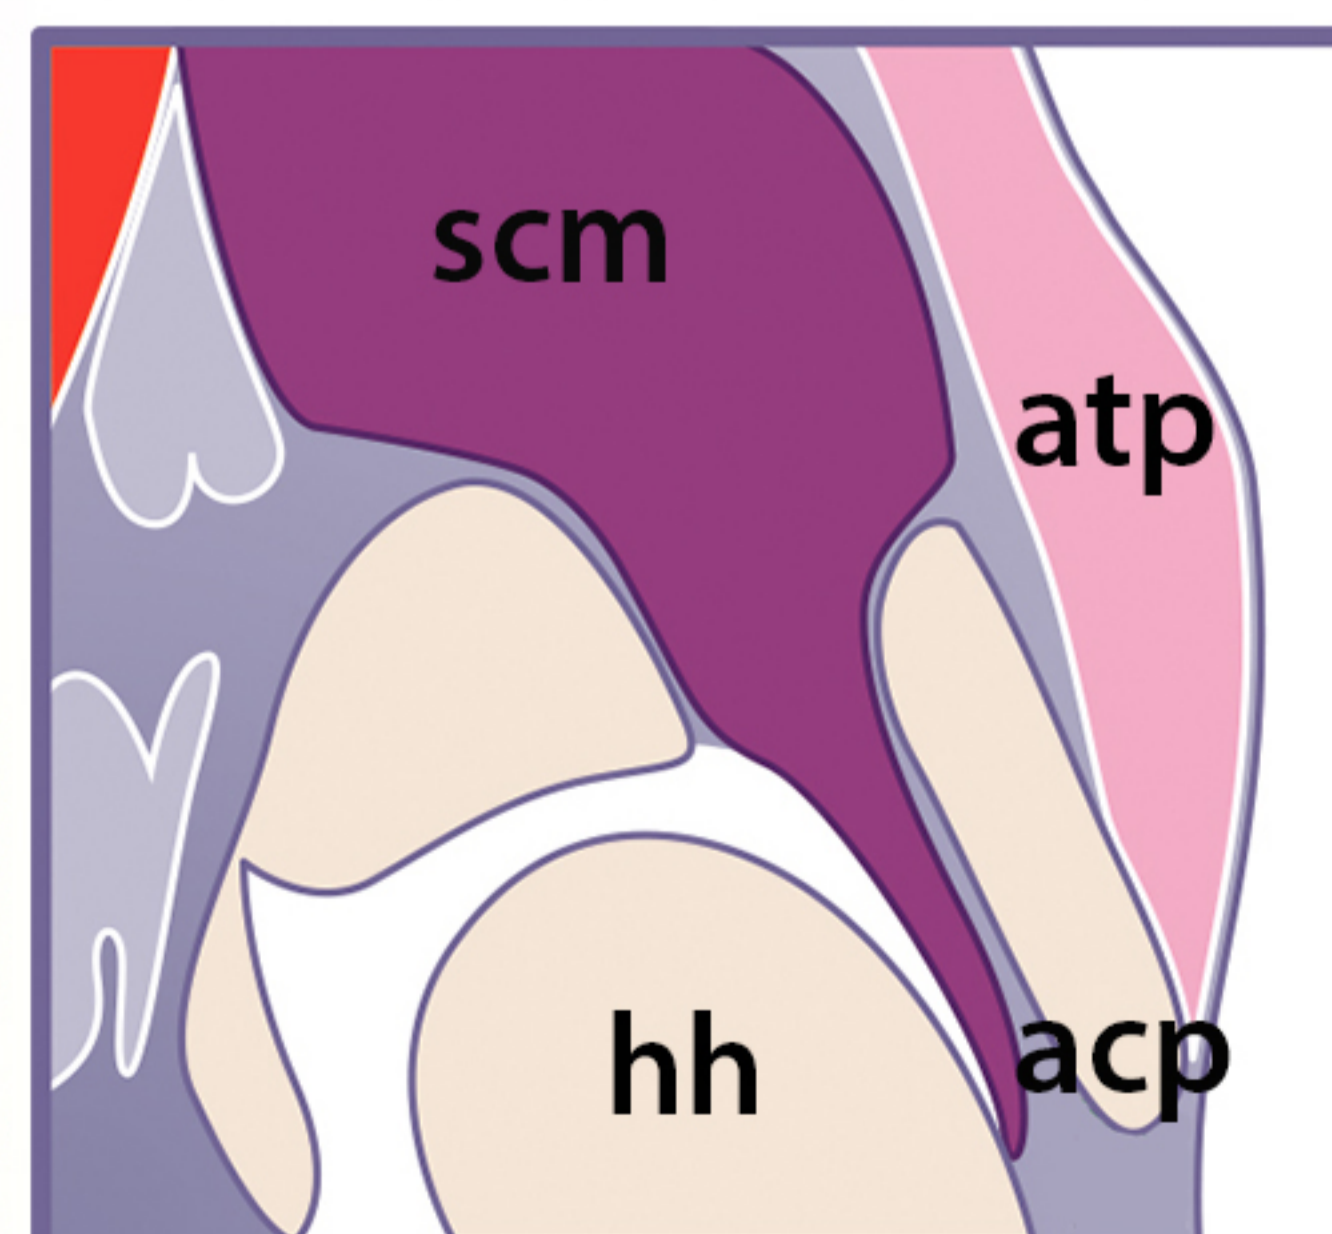

Hoechst Tnnt3 Tomato

Figure 2

Level B

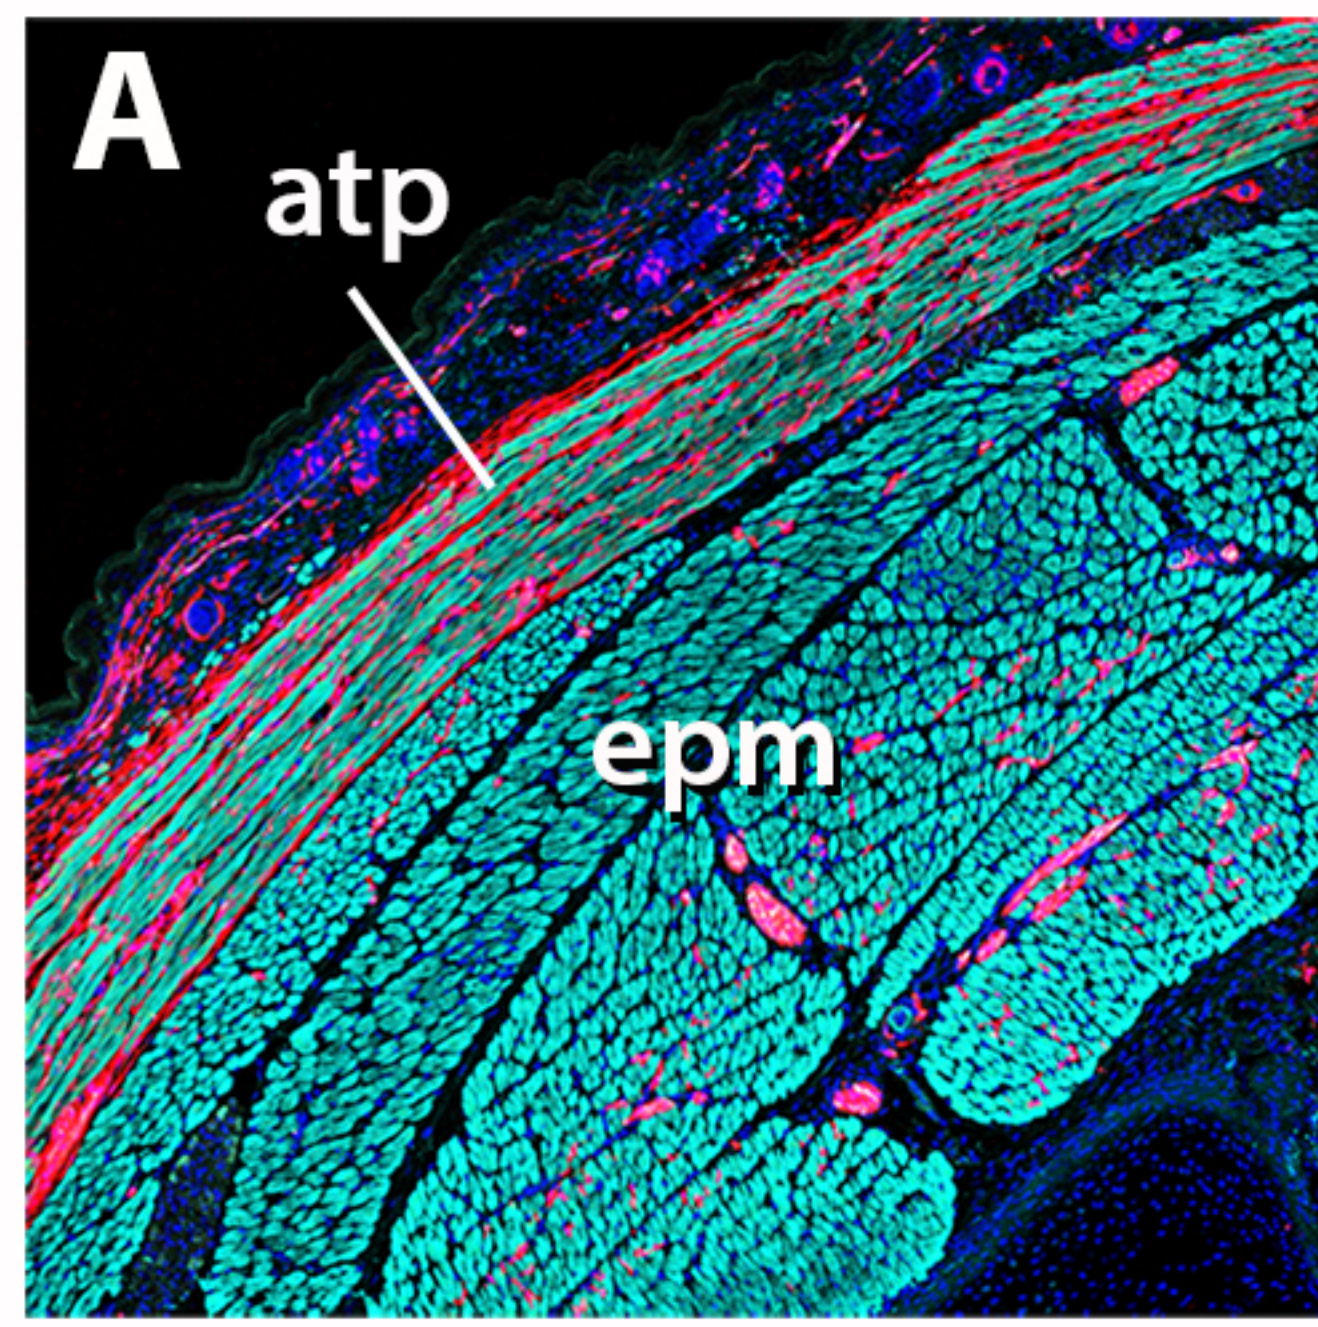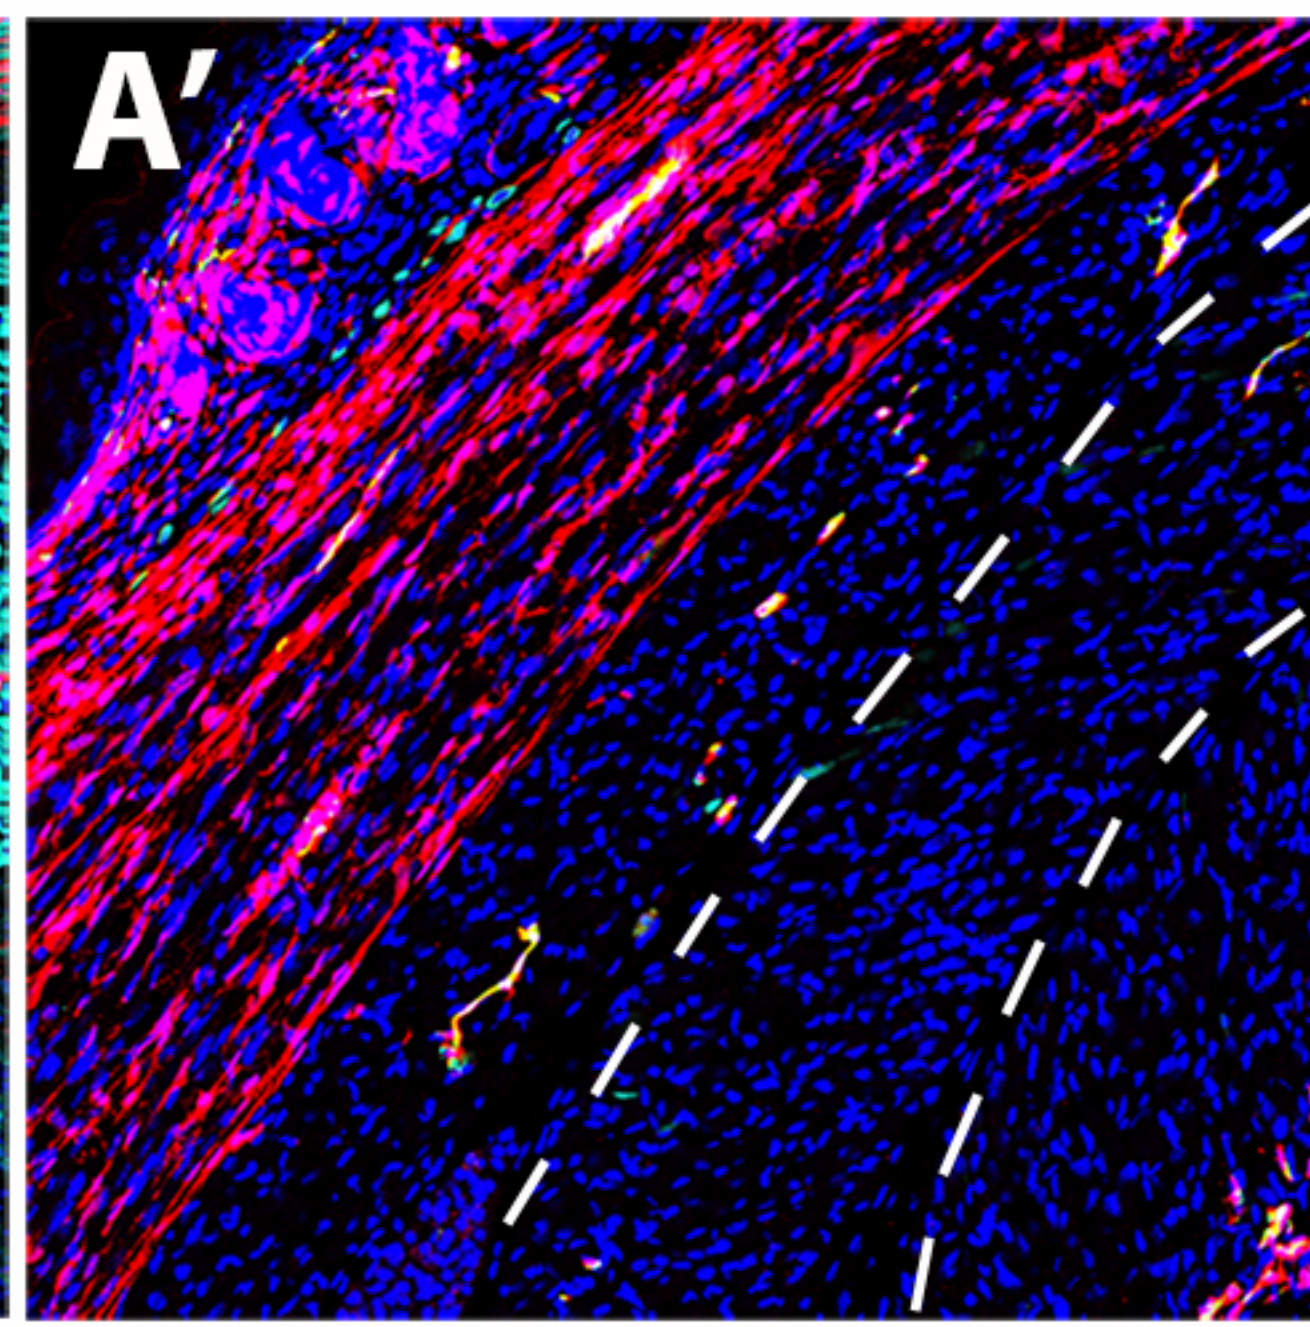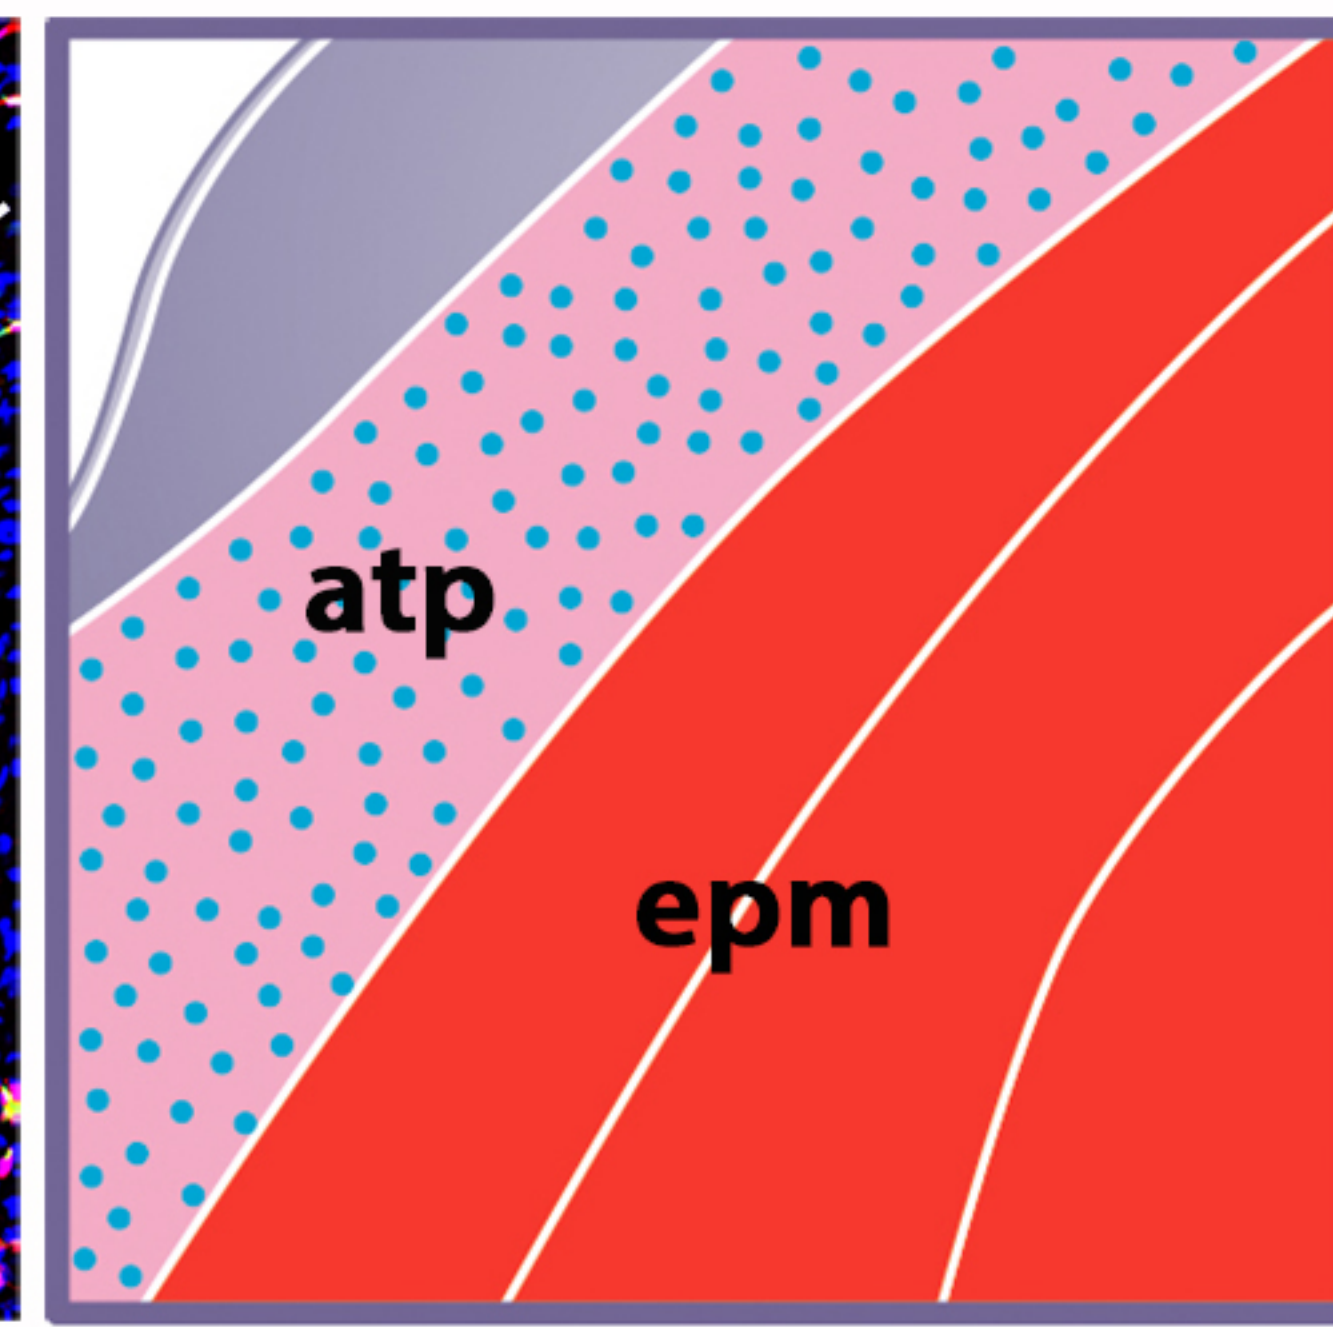

- Neural crest-derived MCT
- Skeletal components
- Other tissues

Myogenic lineage

- Branchiomeric
- Anterior-most somites
- More posterior somites

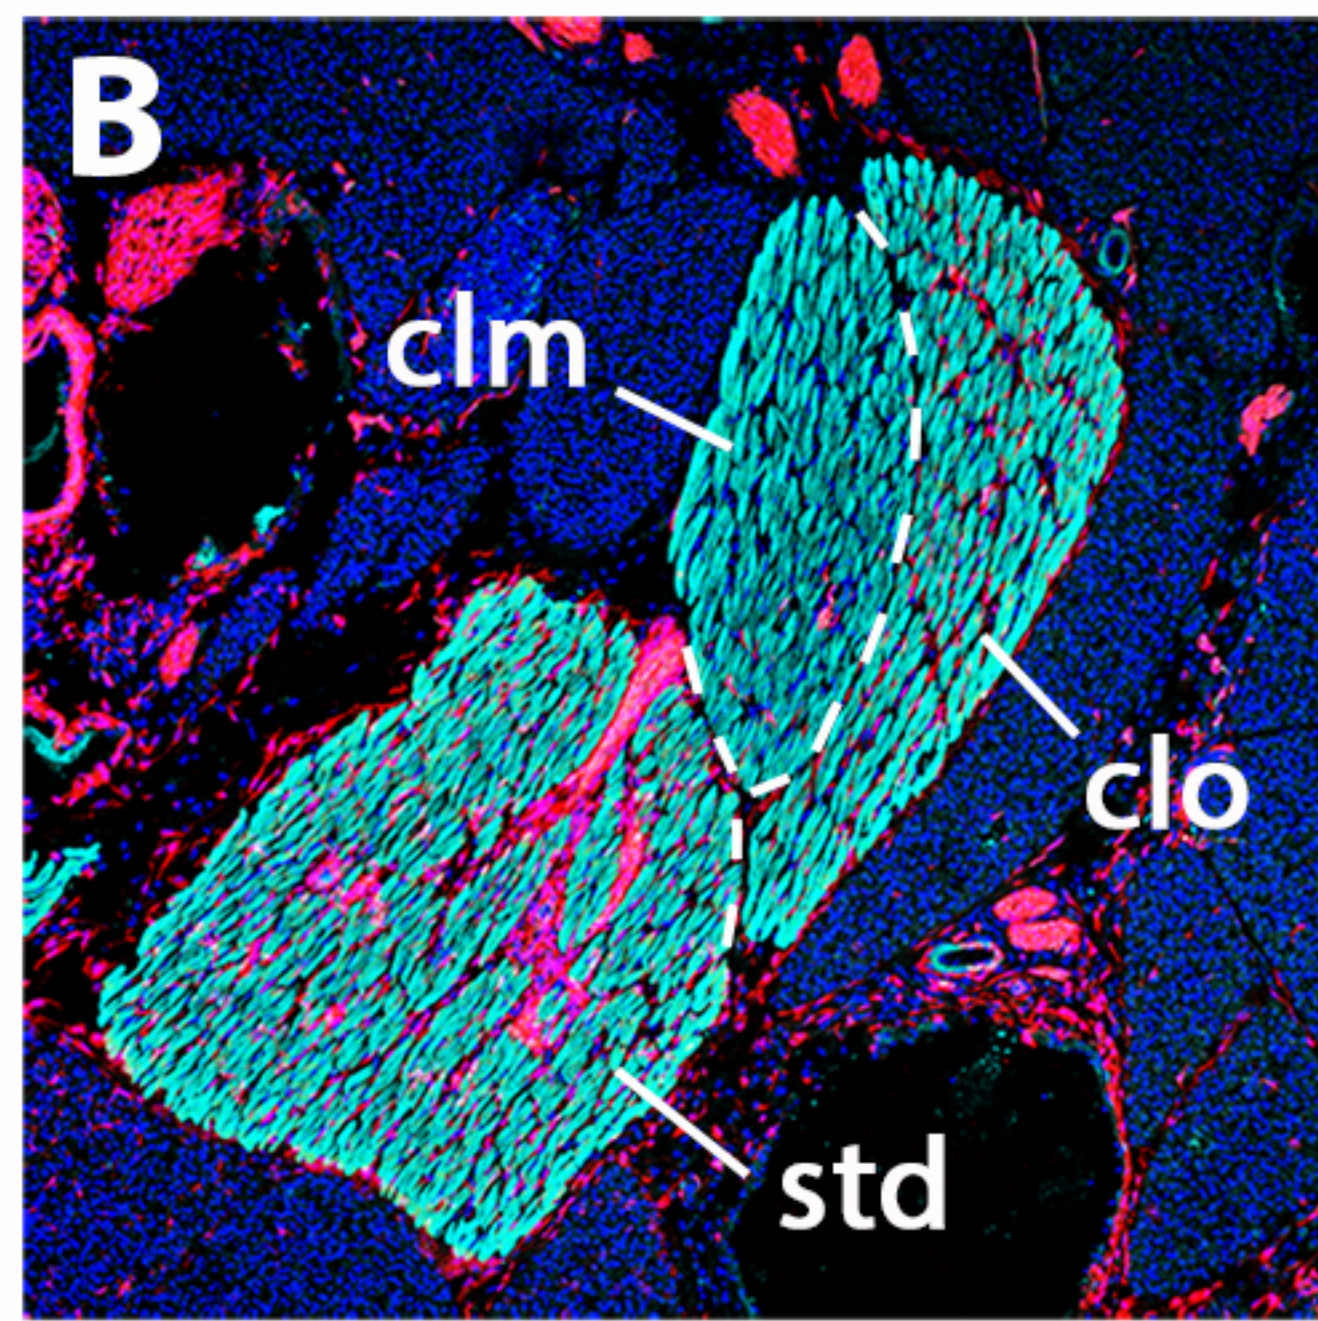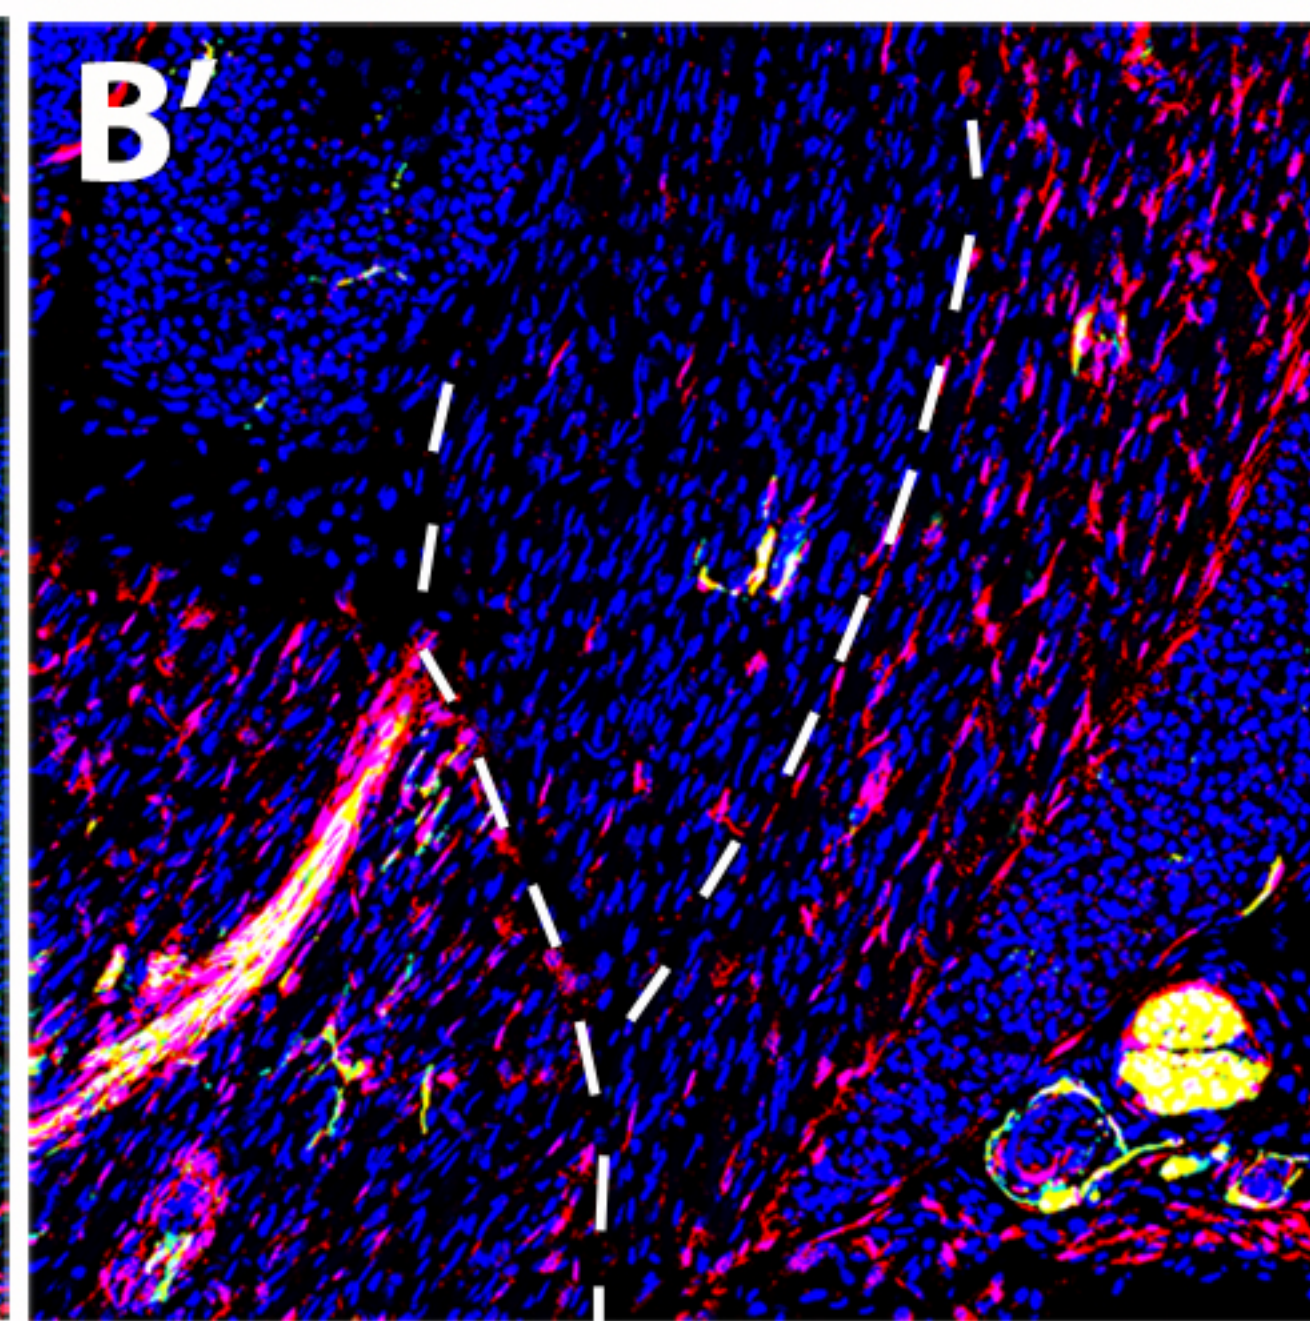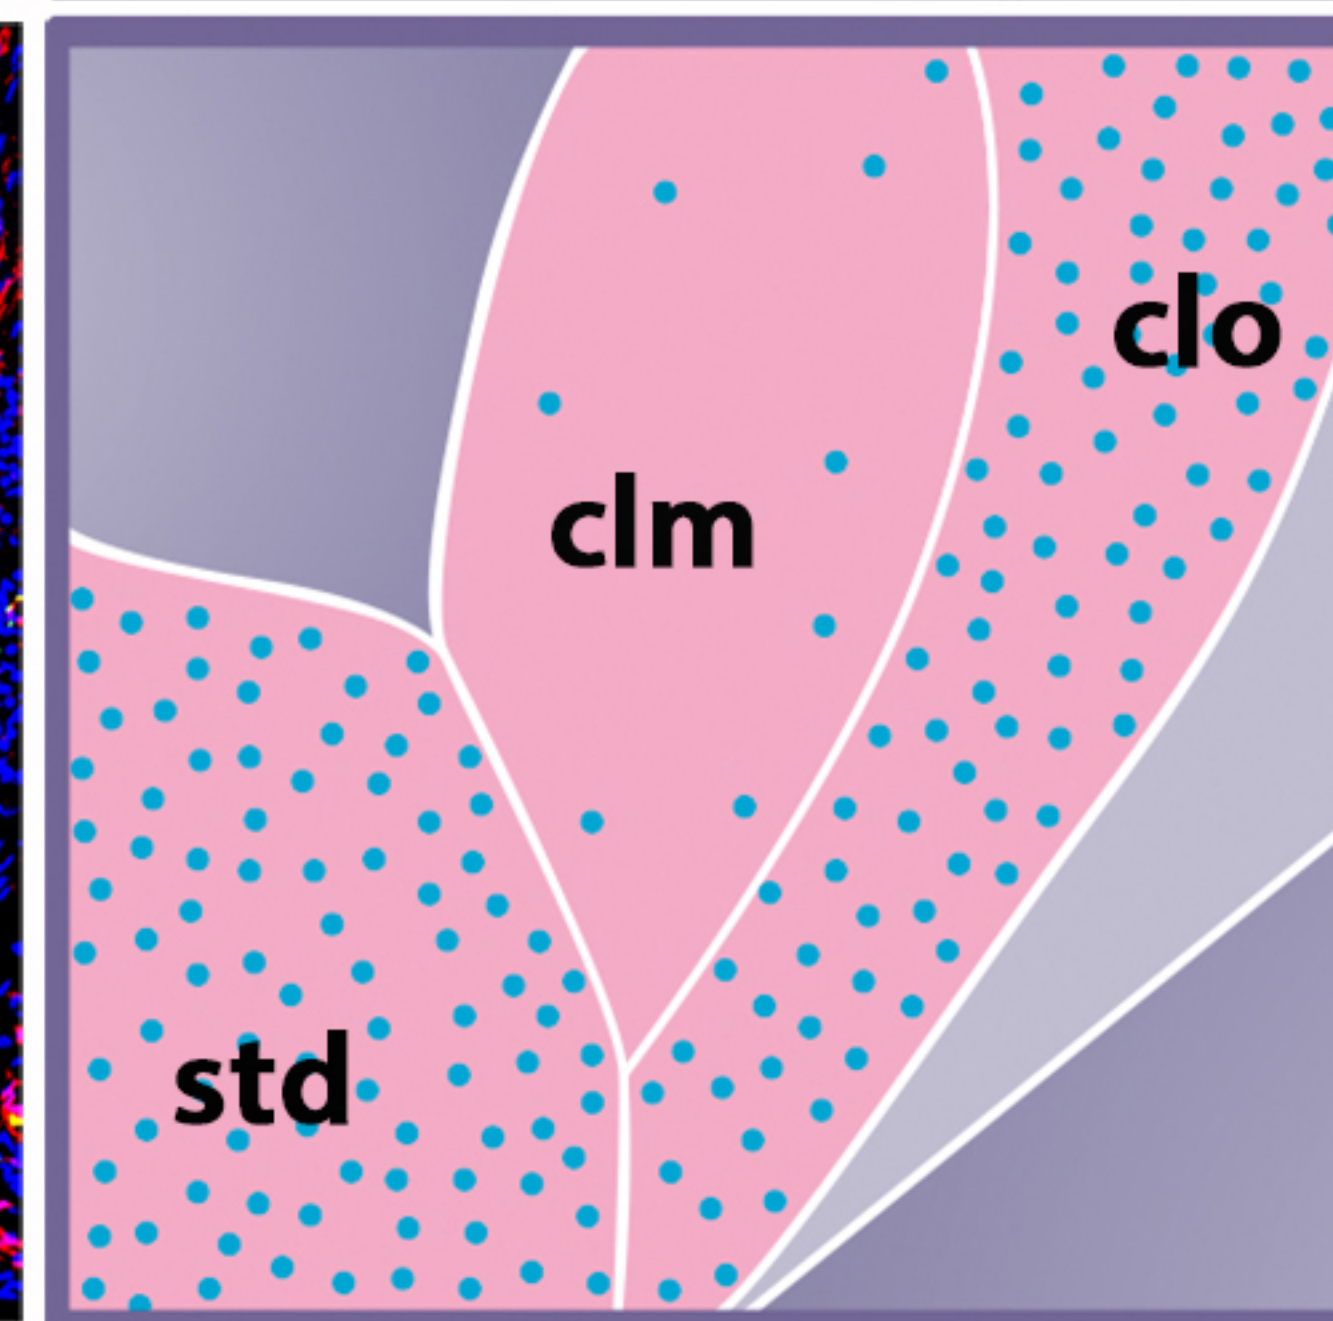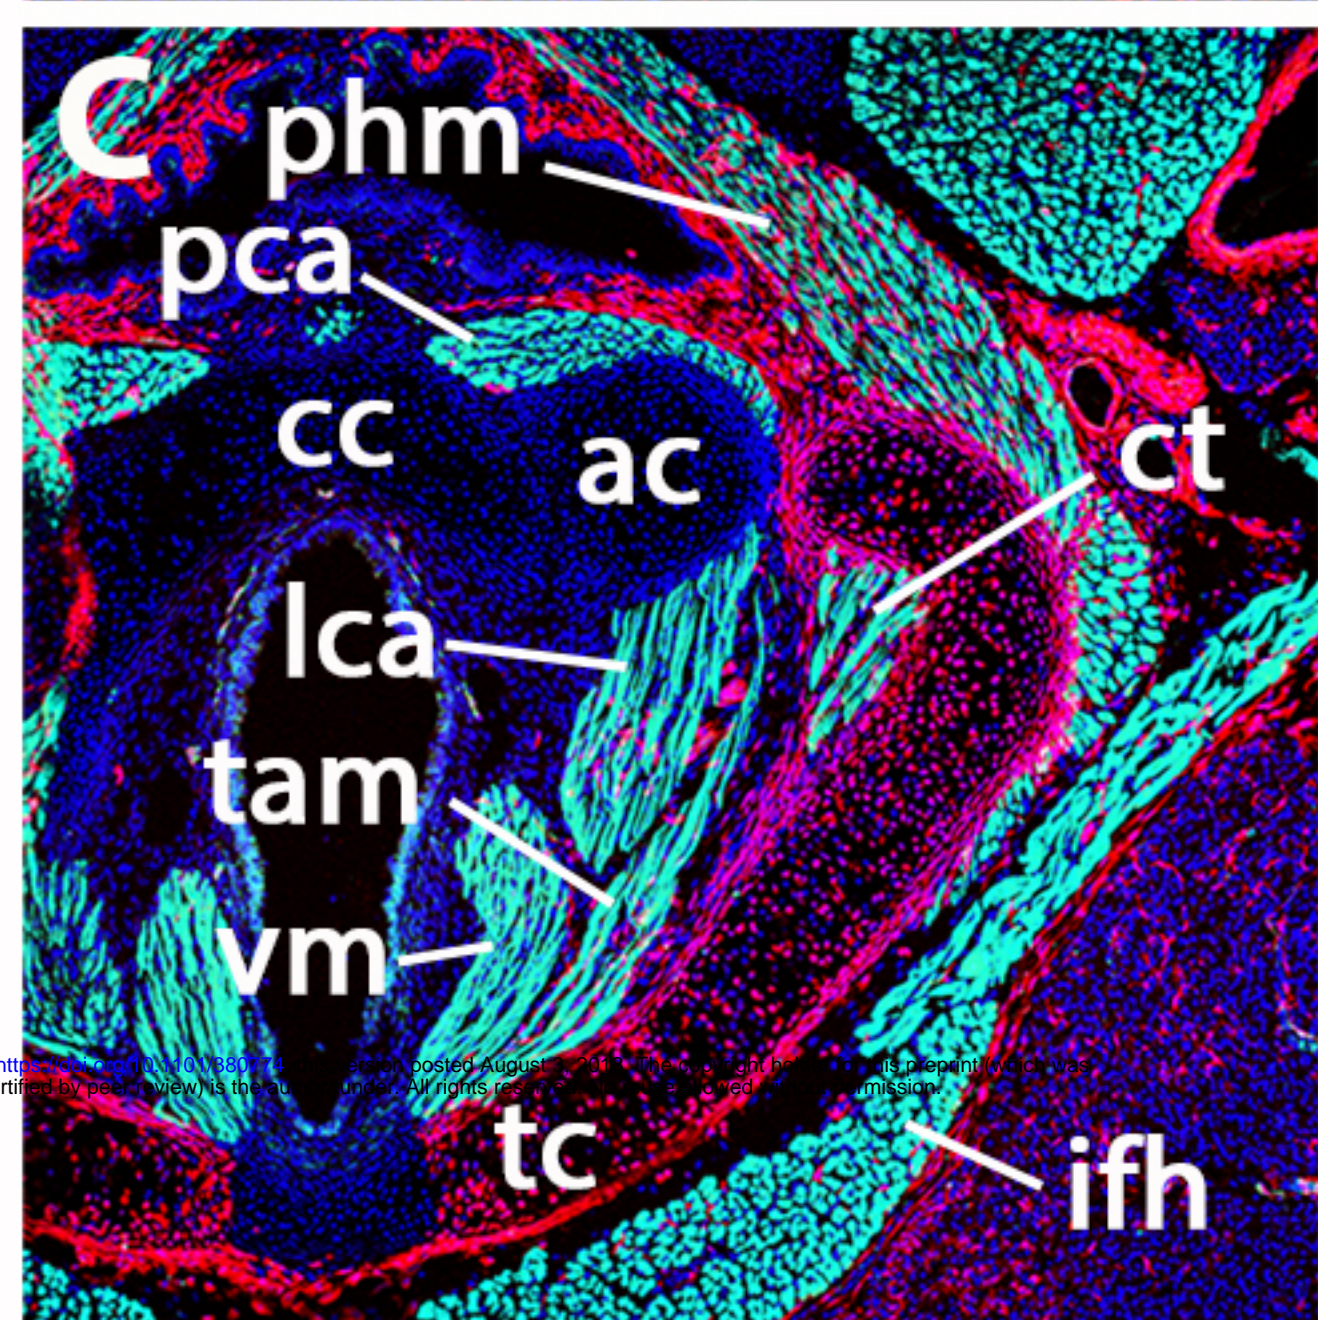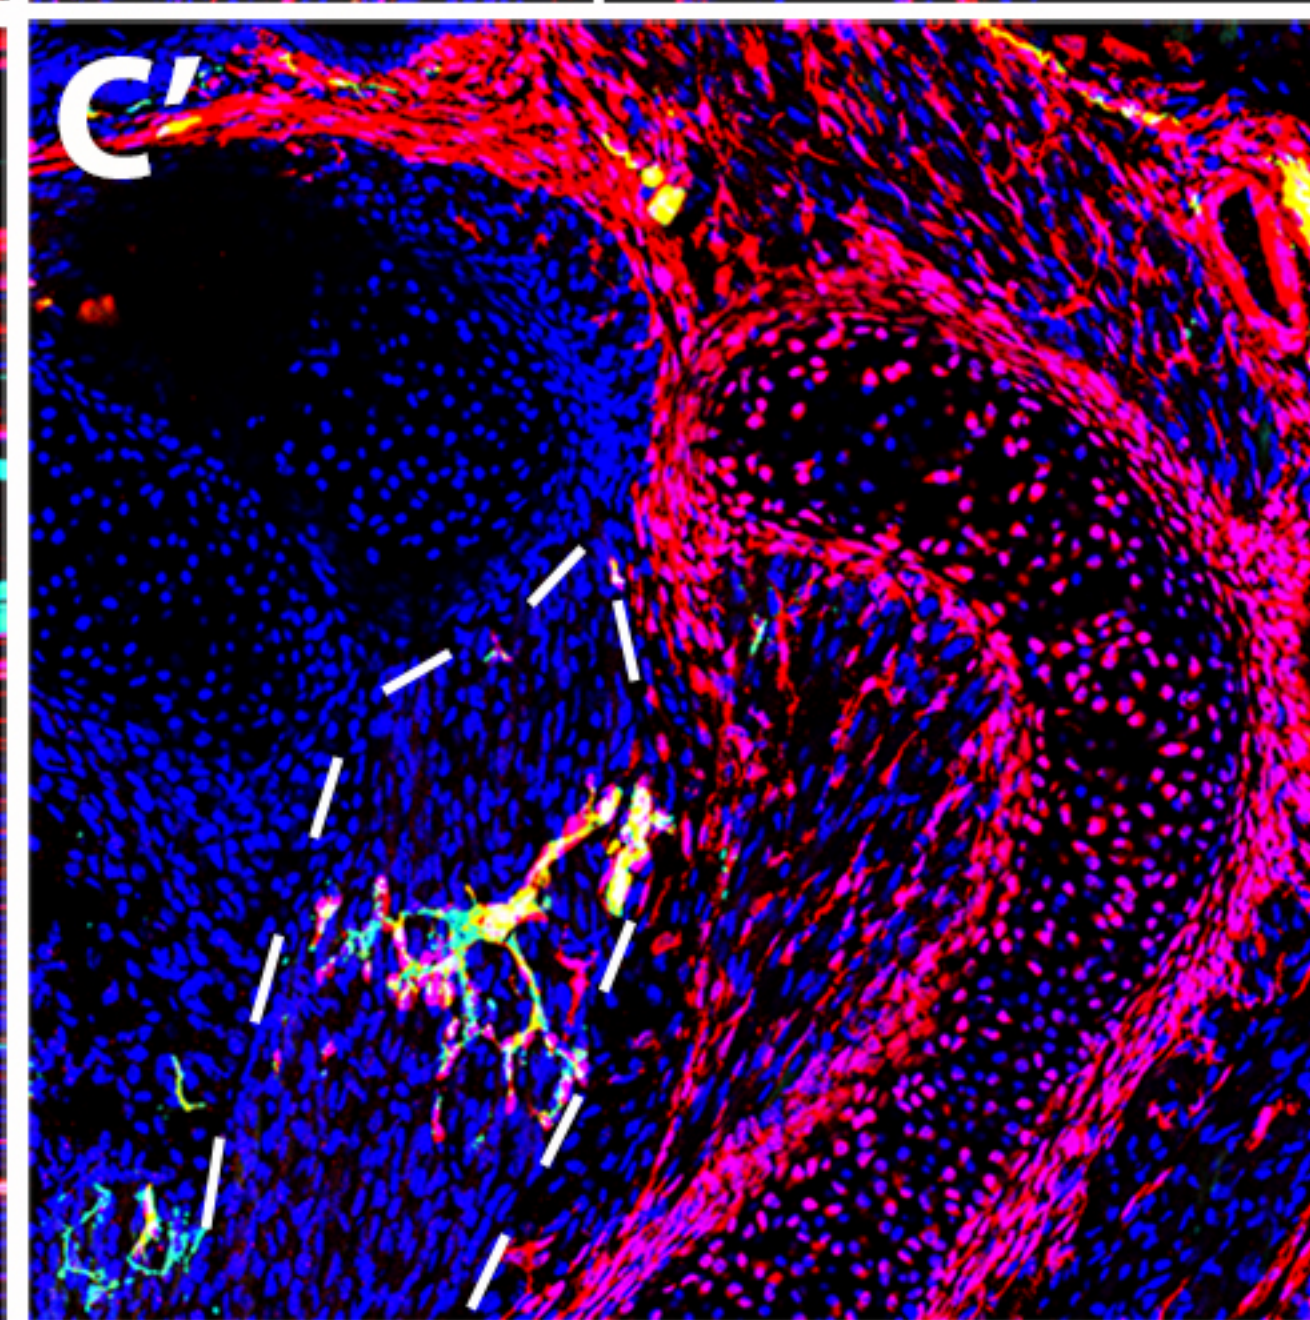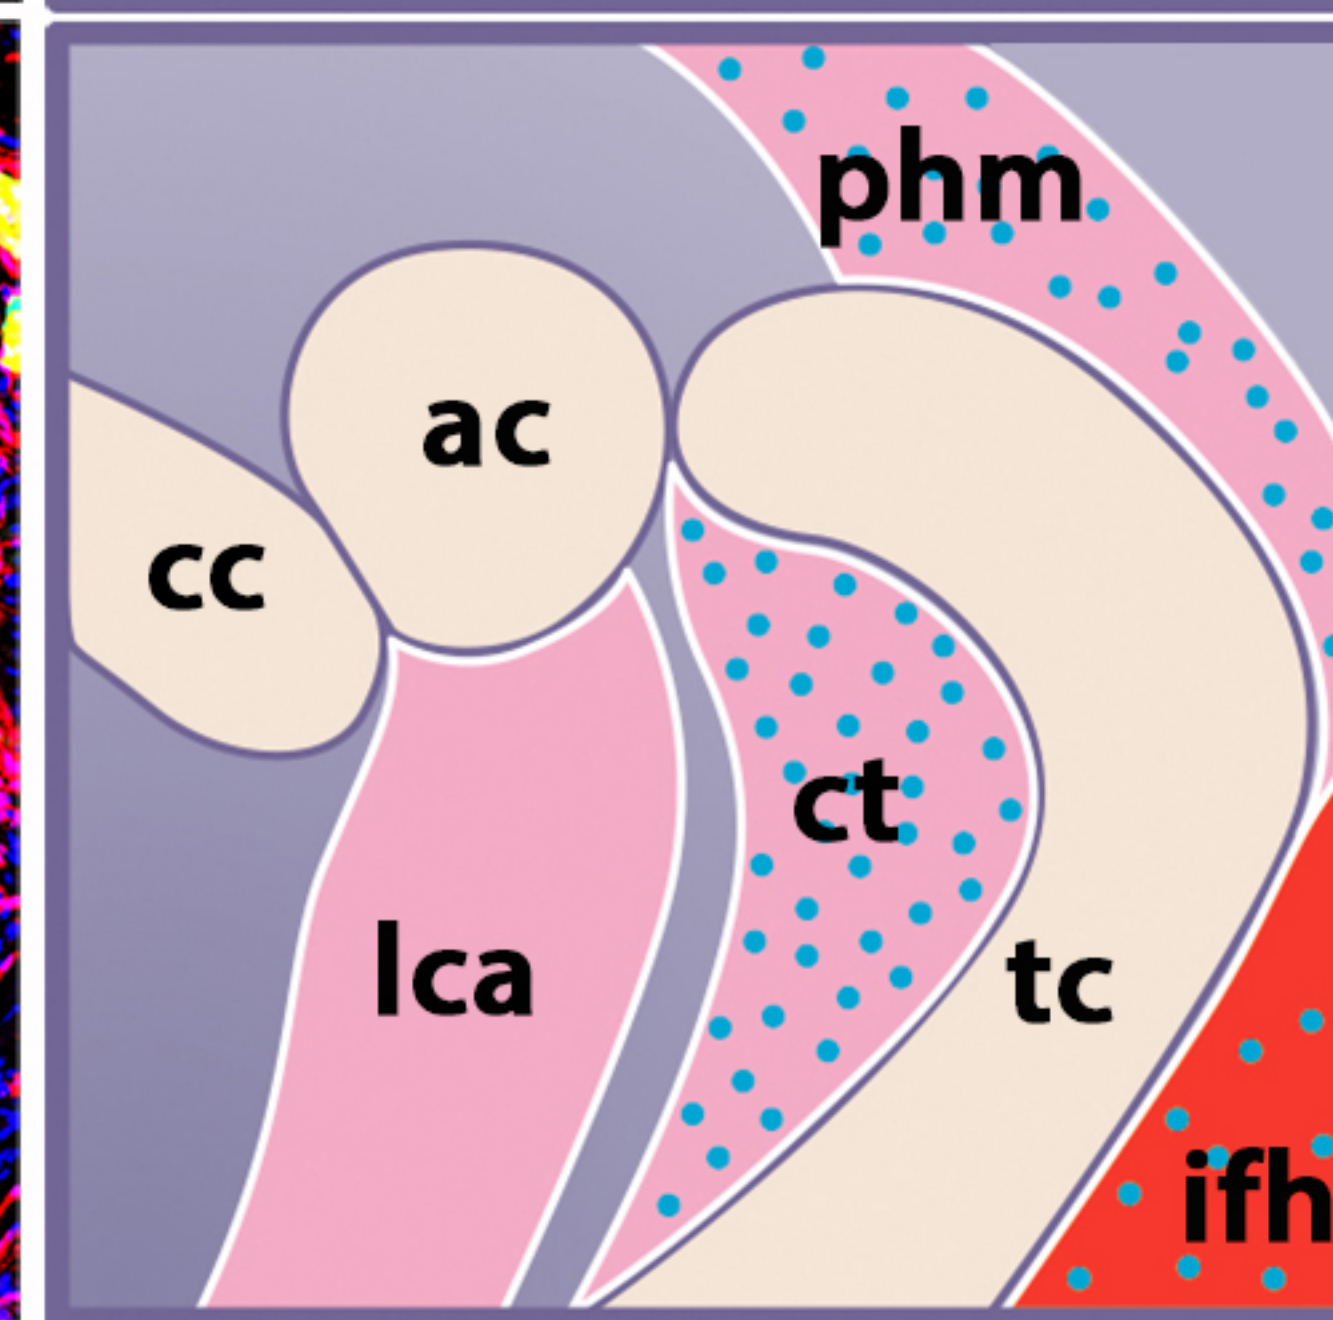

Level C

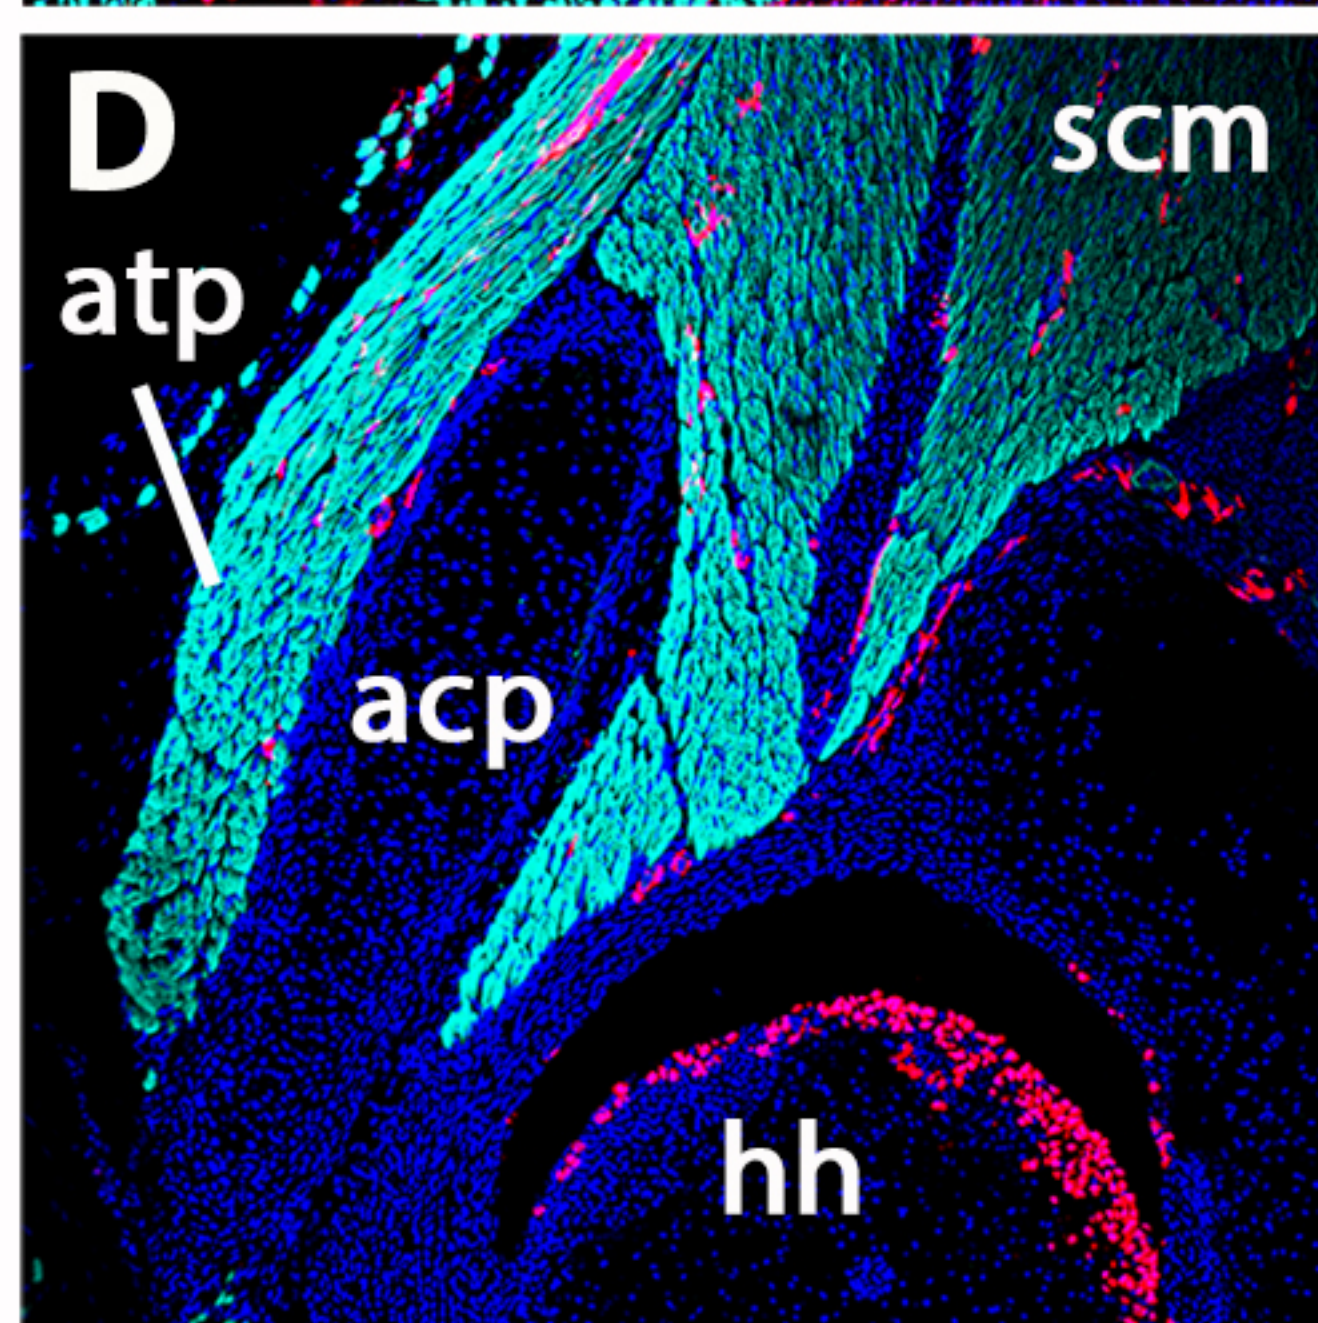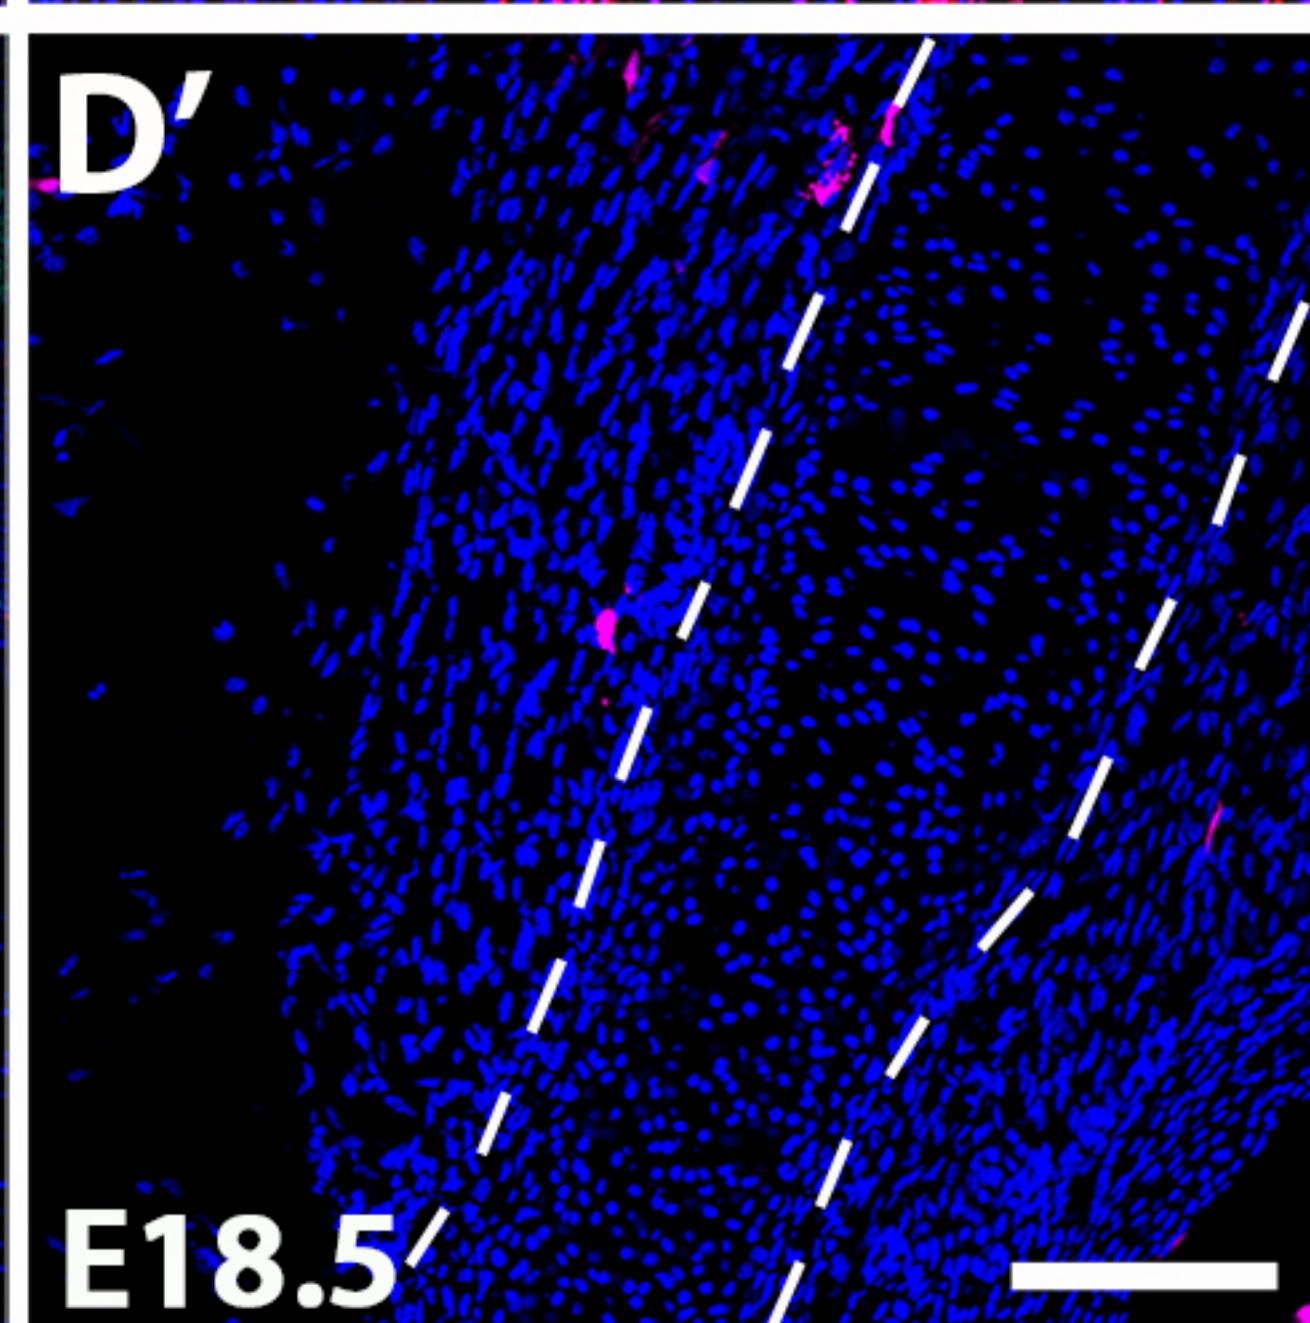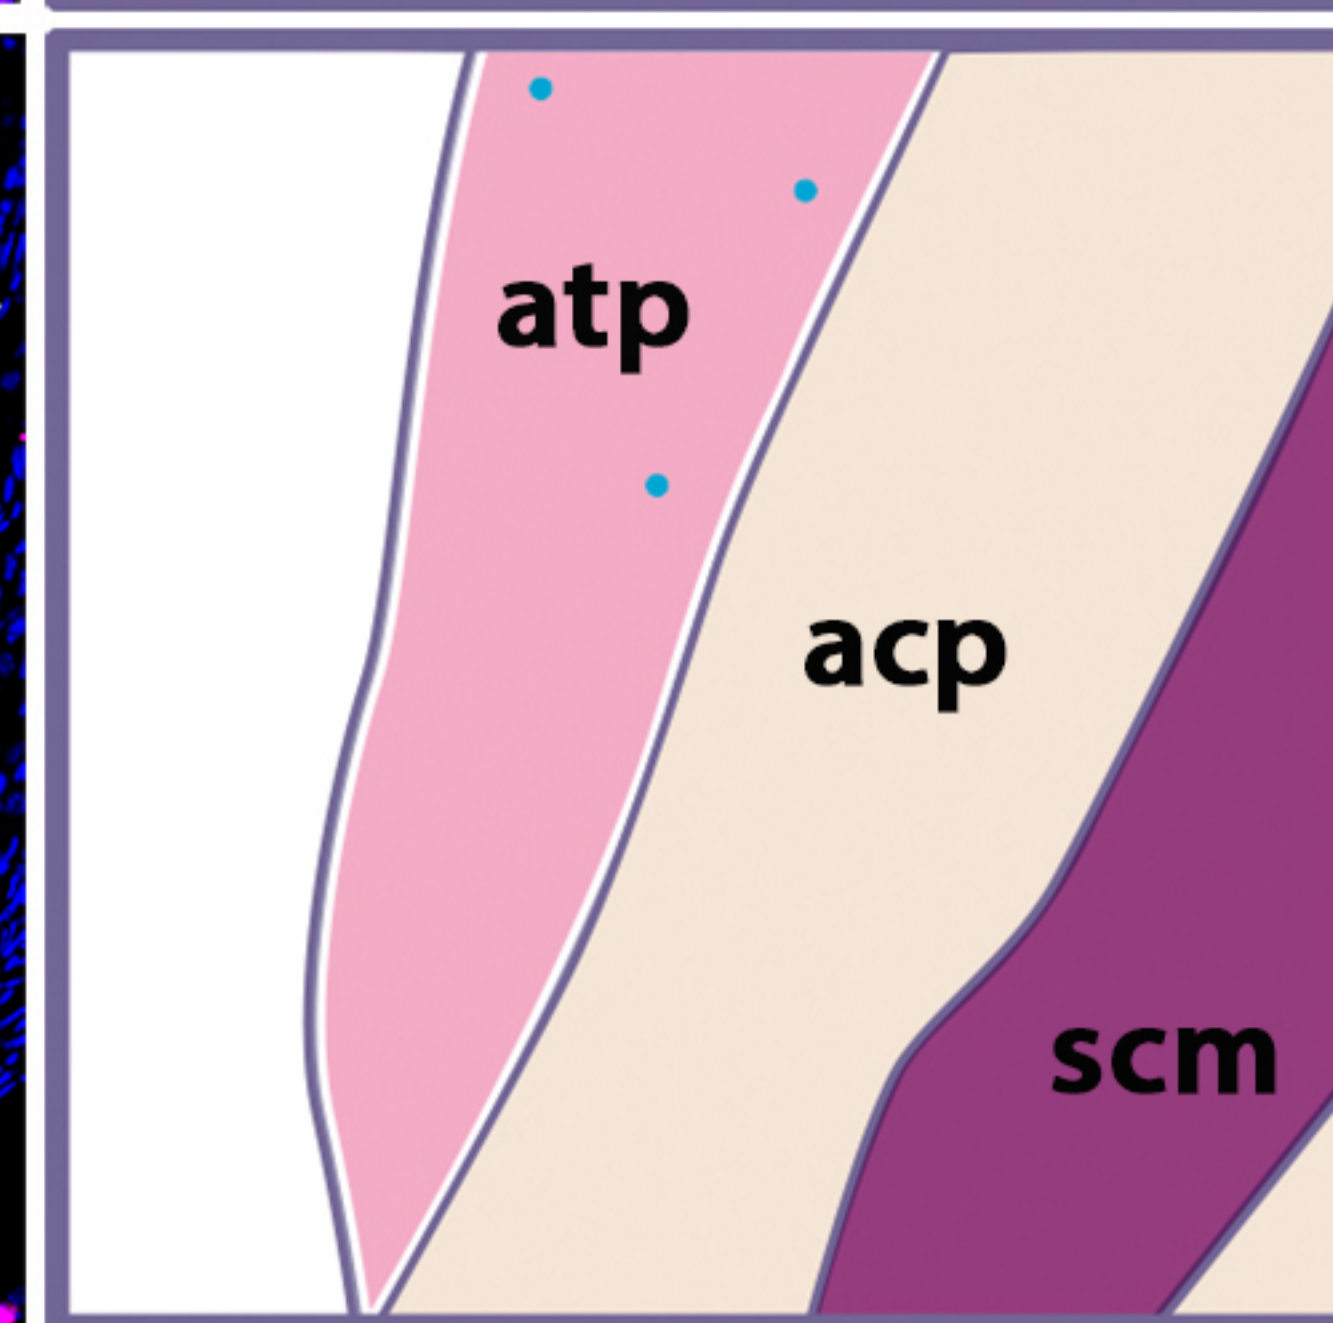

Hoechst Tnnt3 Tomato Hoechst Tuj1 Tomato

Figure 3



*Prx1<sup>Cre</sup>; R26R*

*Prx1<sup>Cre</sup>; R26<sup>mTmG</sup>*

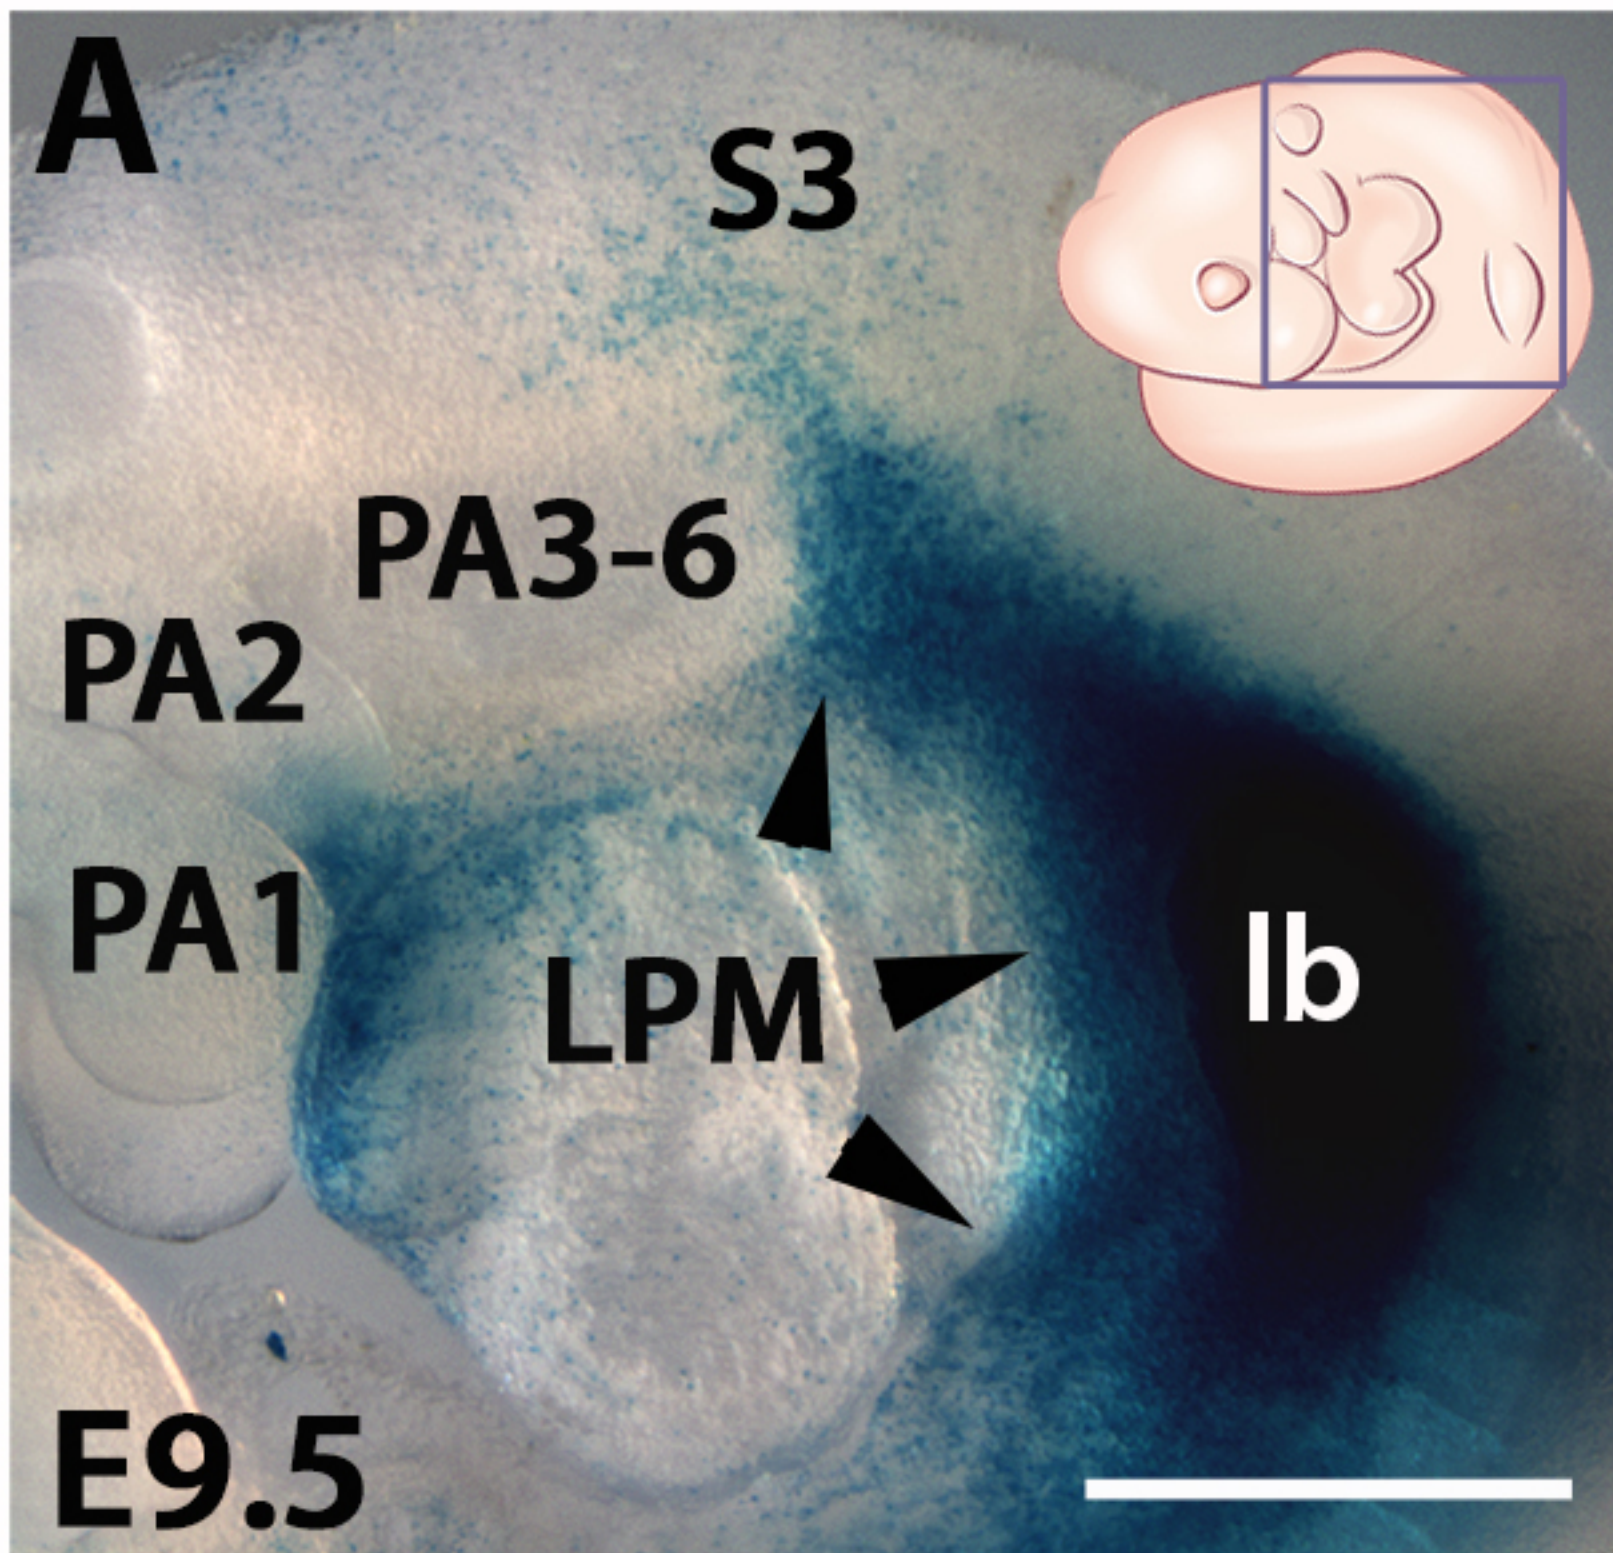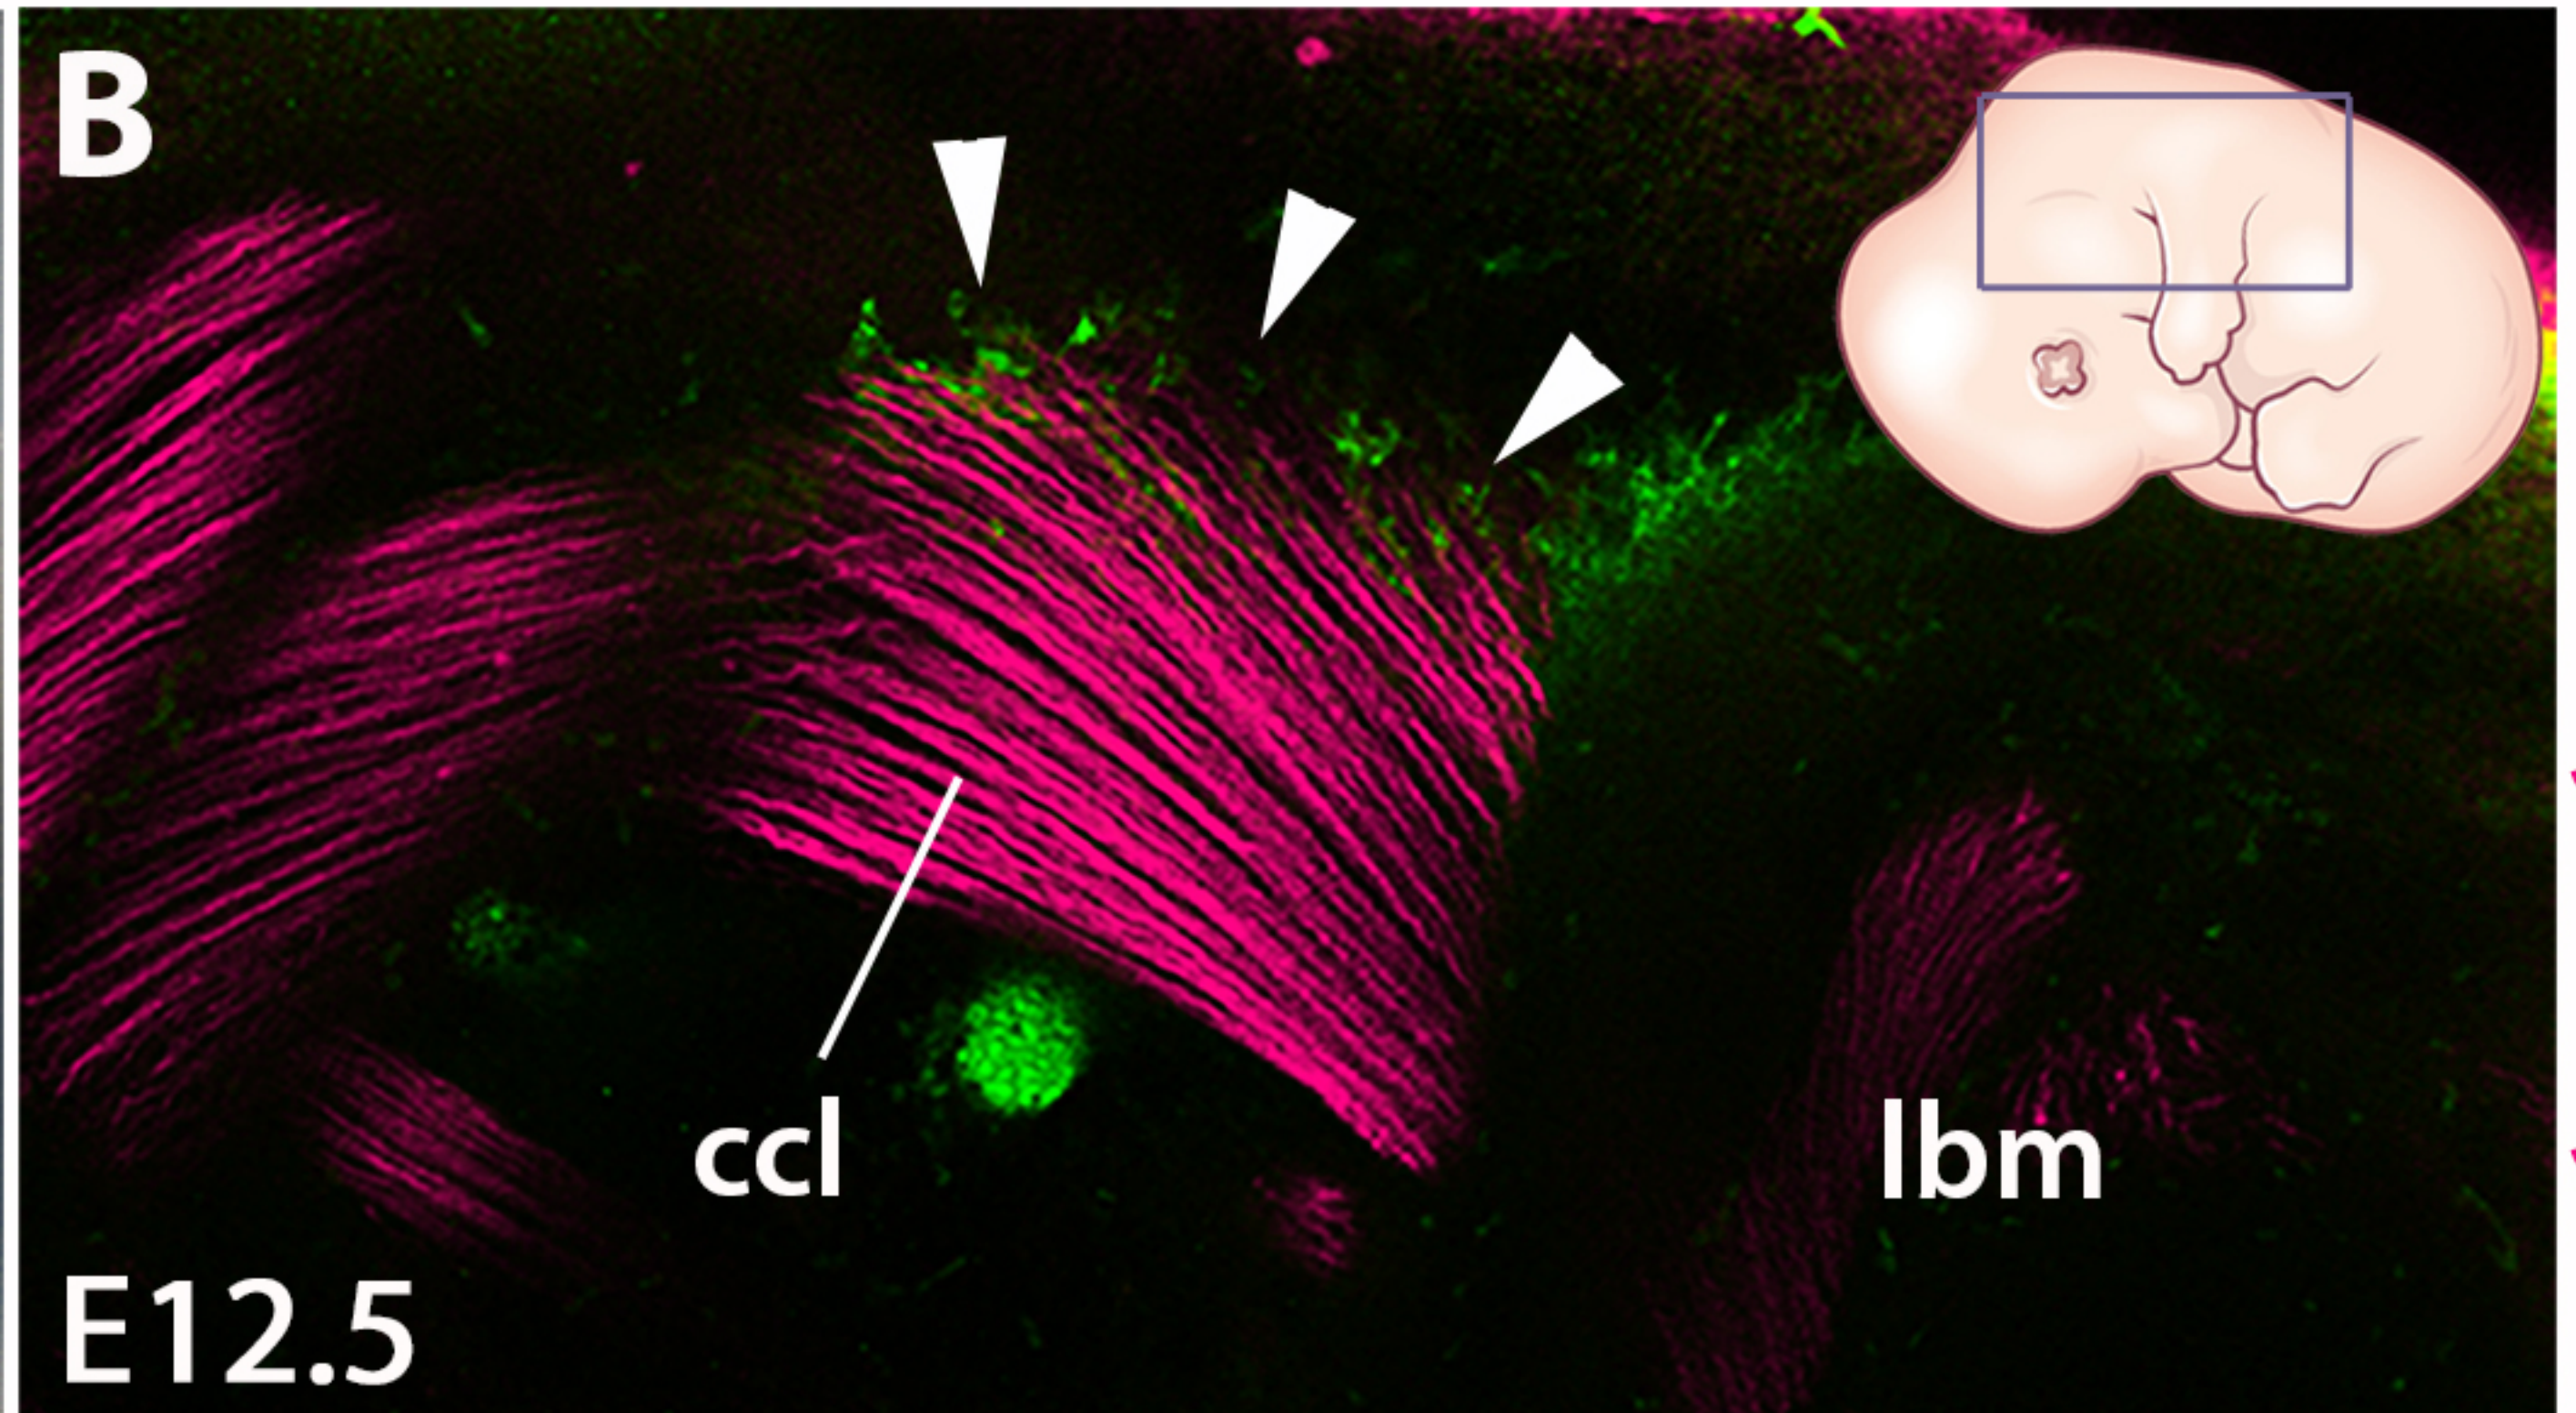

GFP Pax7/Myod/My32

*Prx1<sup>Cre</sup>; R26R*

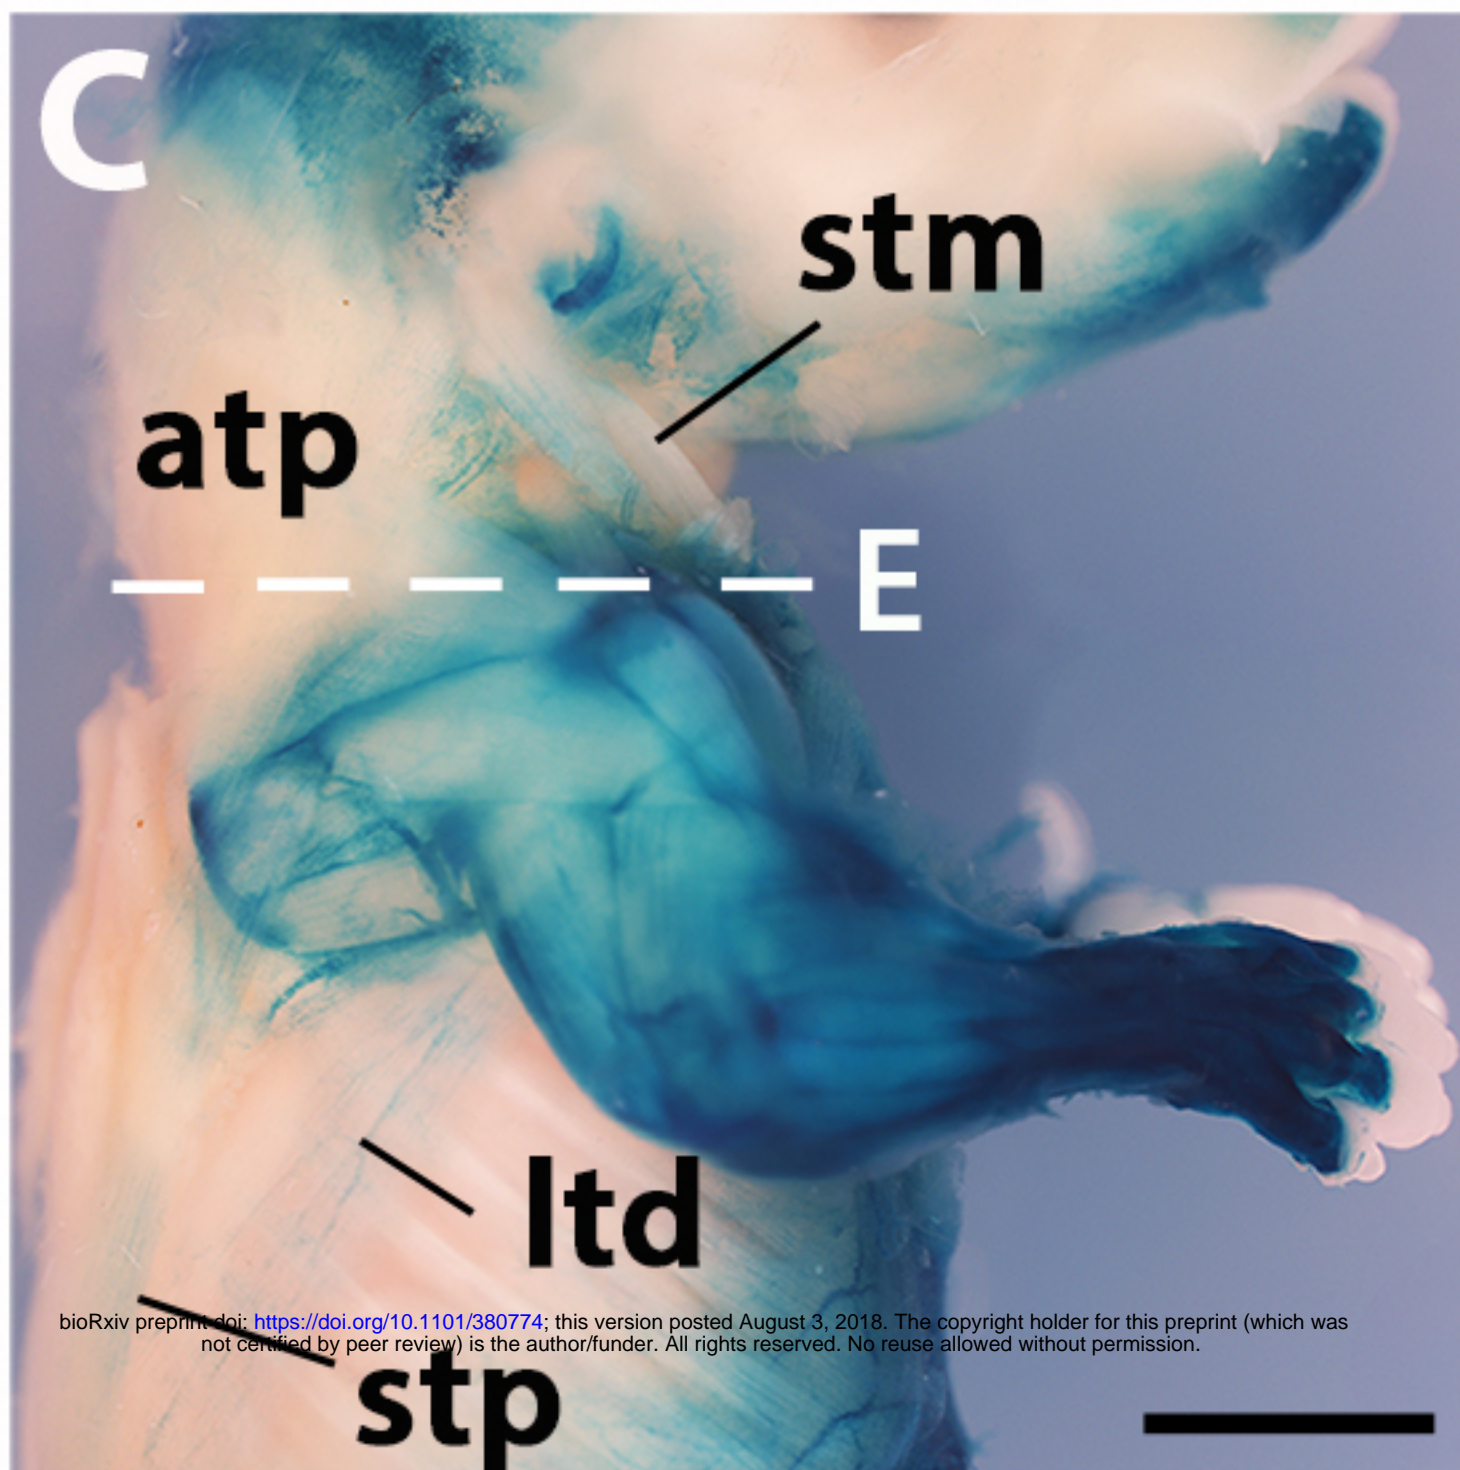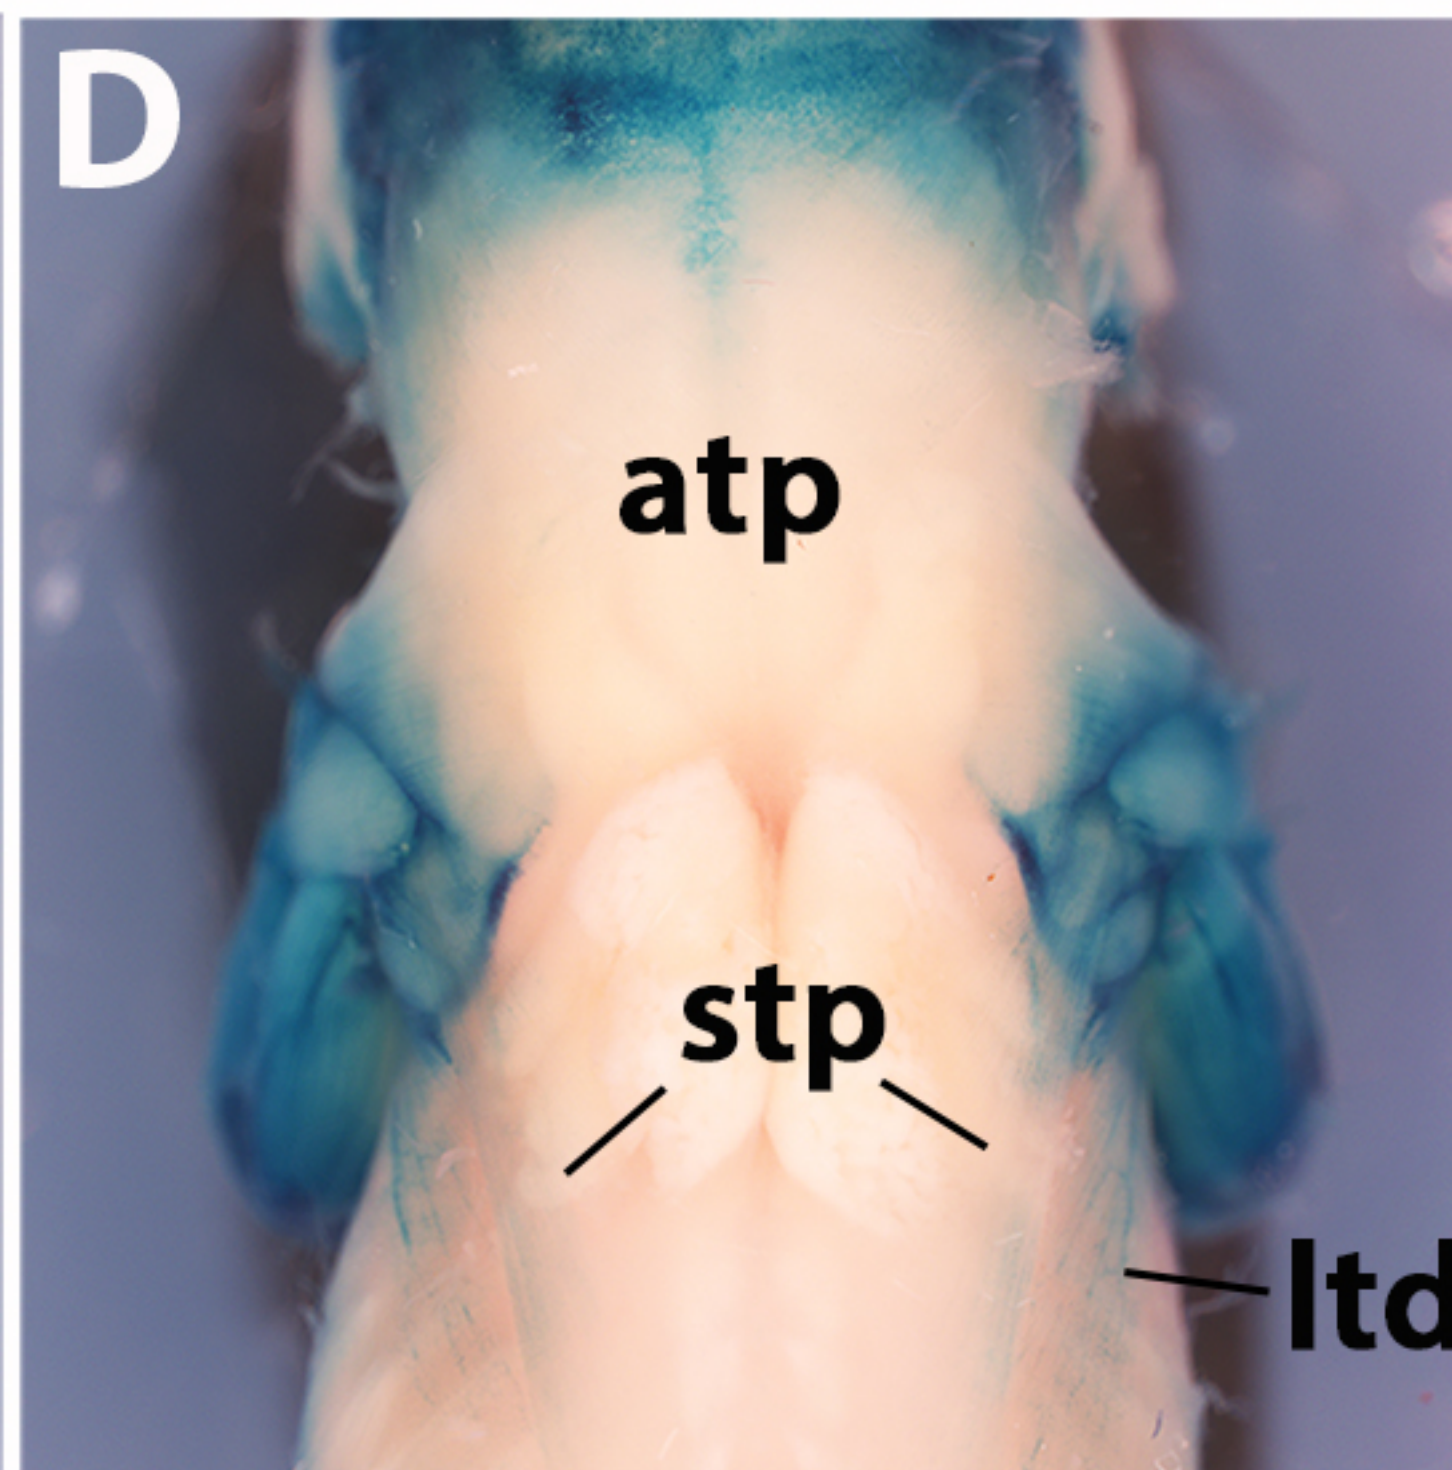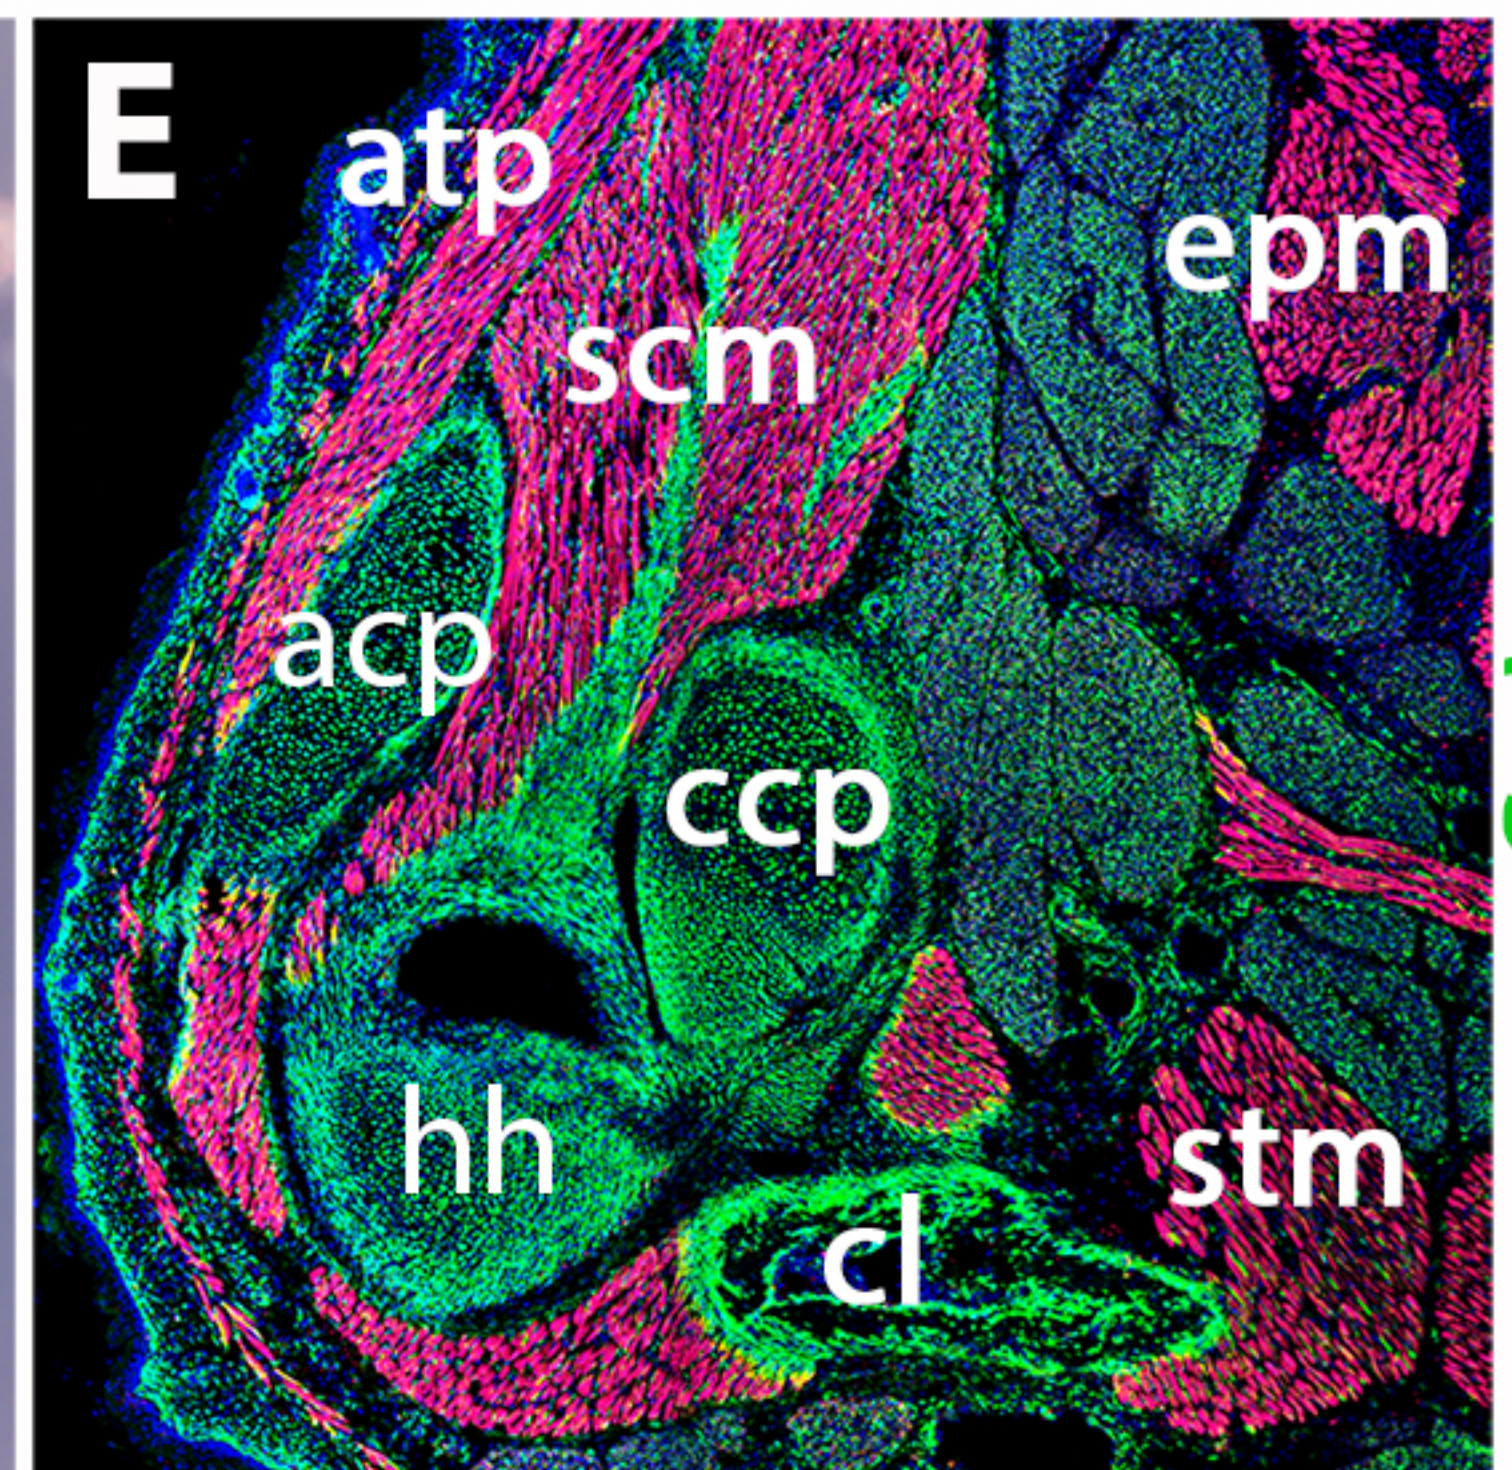

Hoechst  $\beta$ -gal Tnnt3

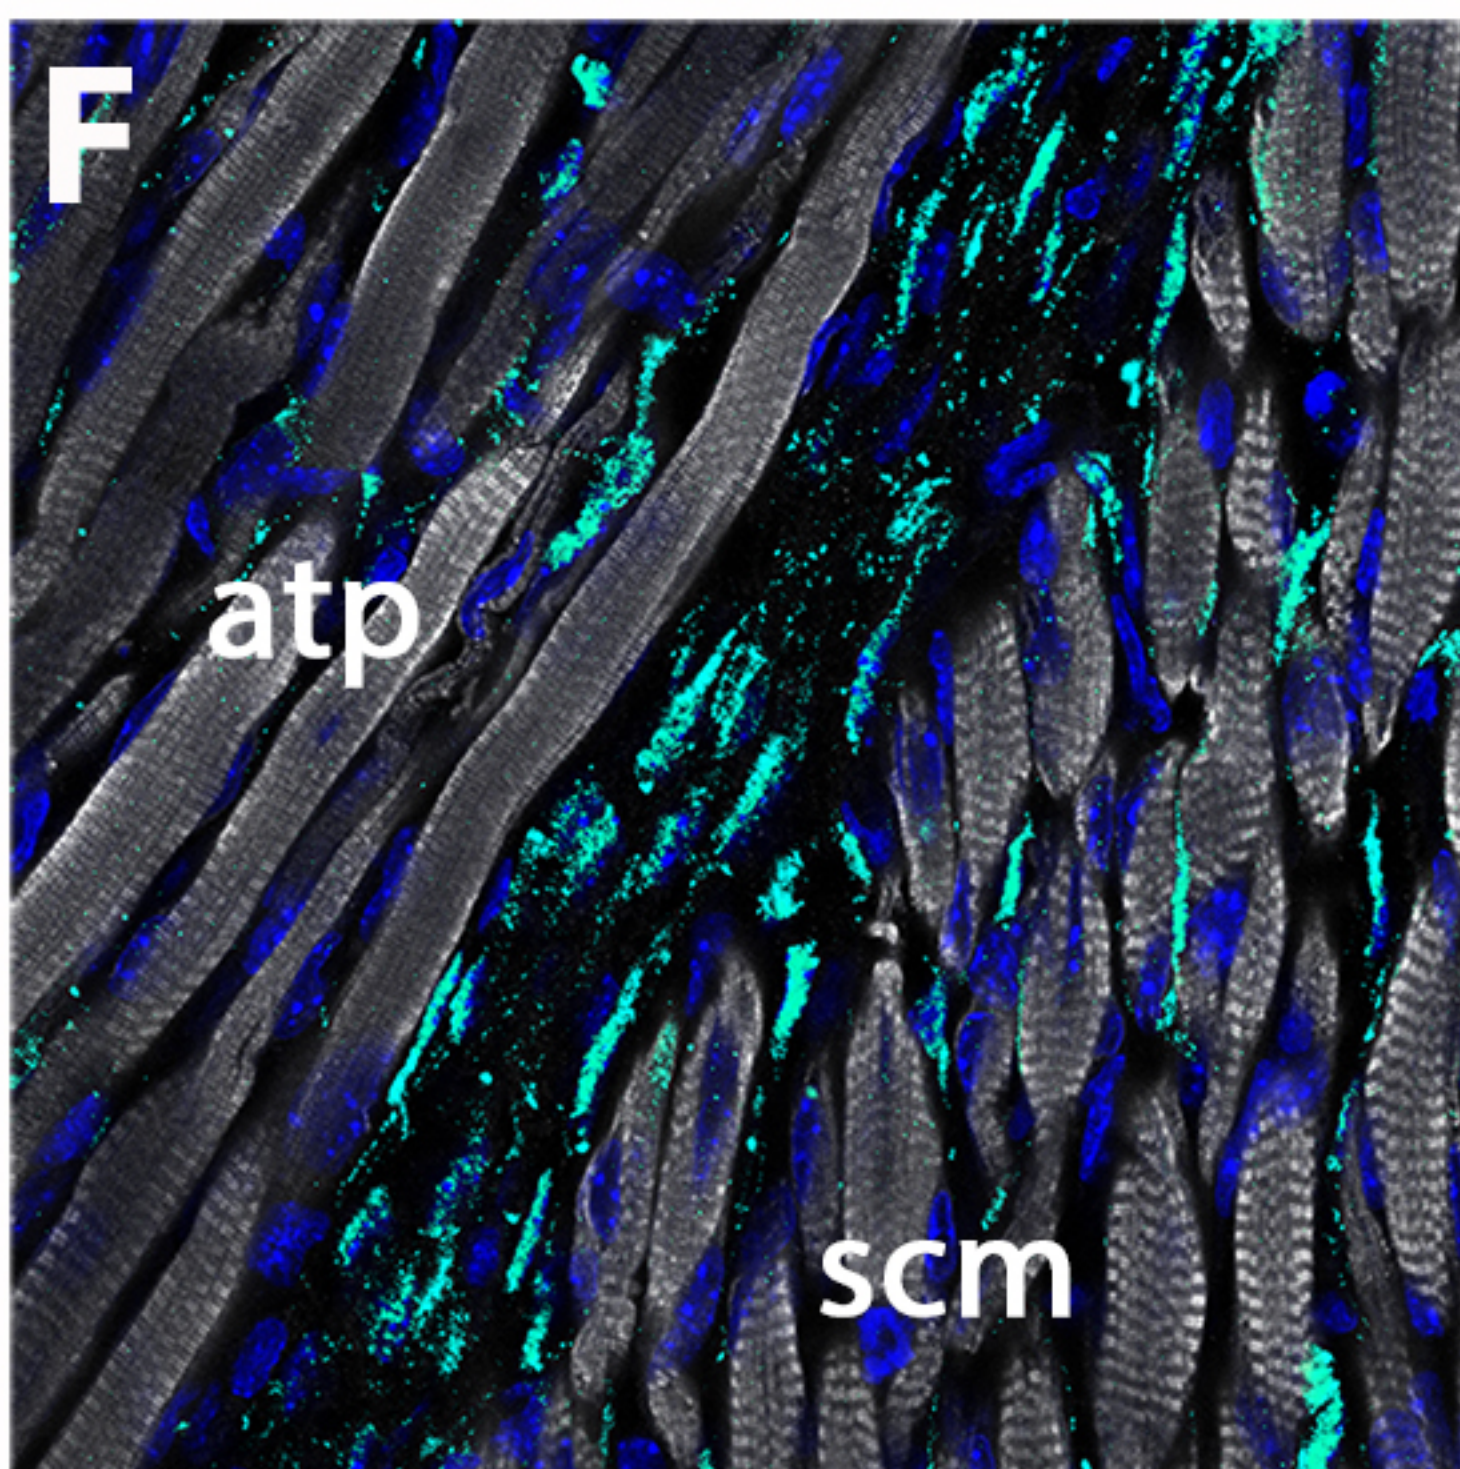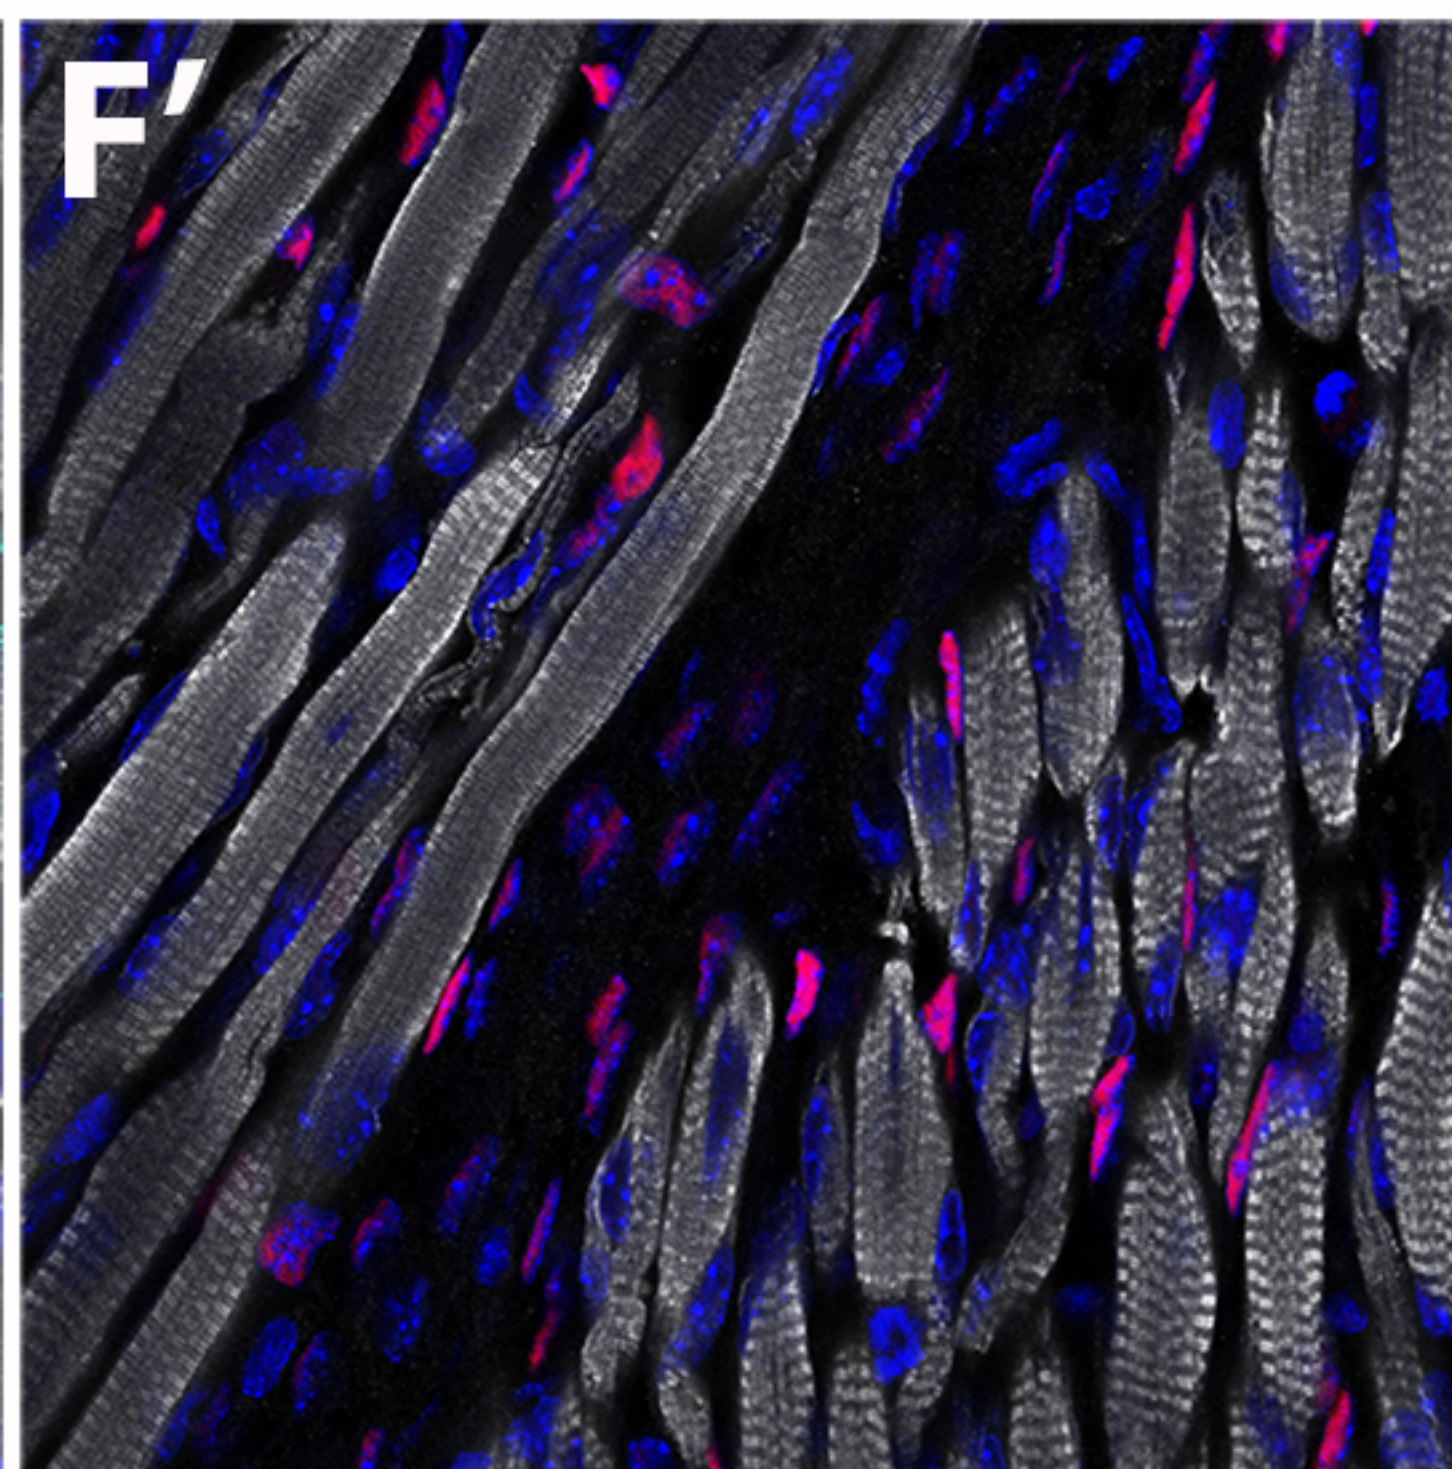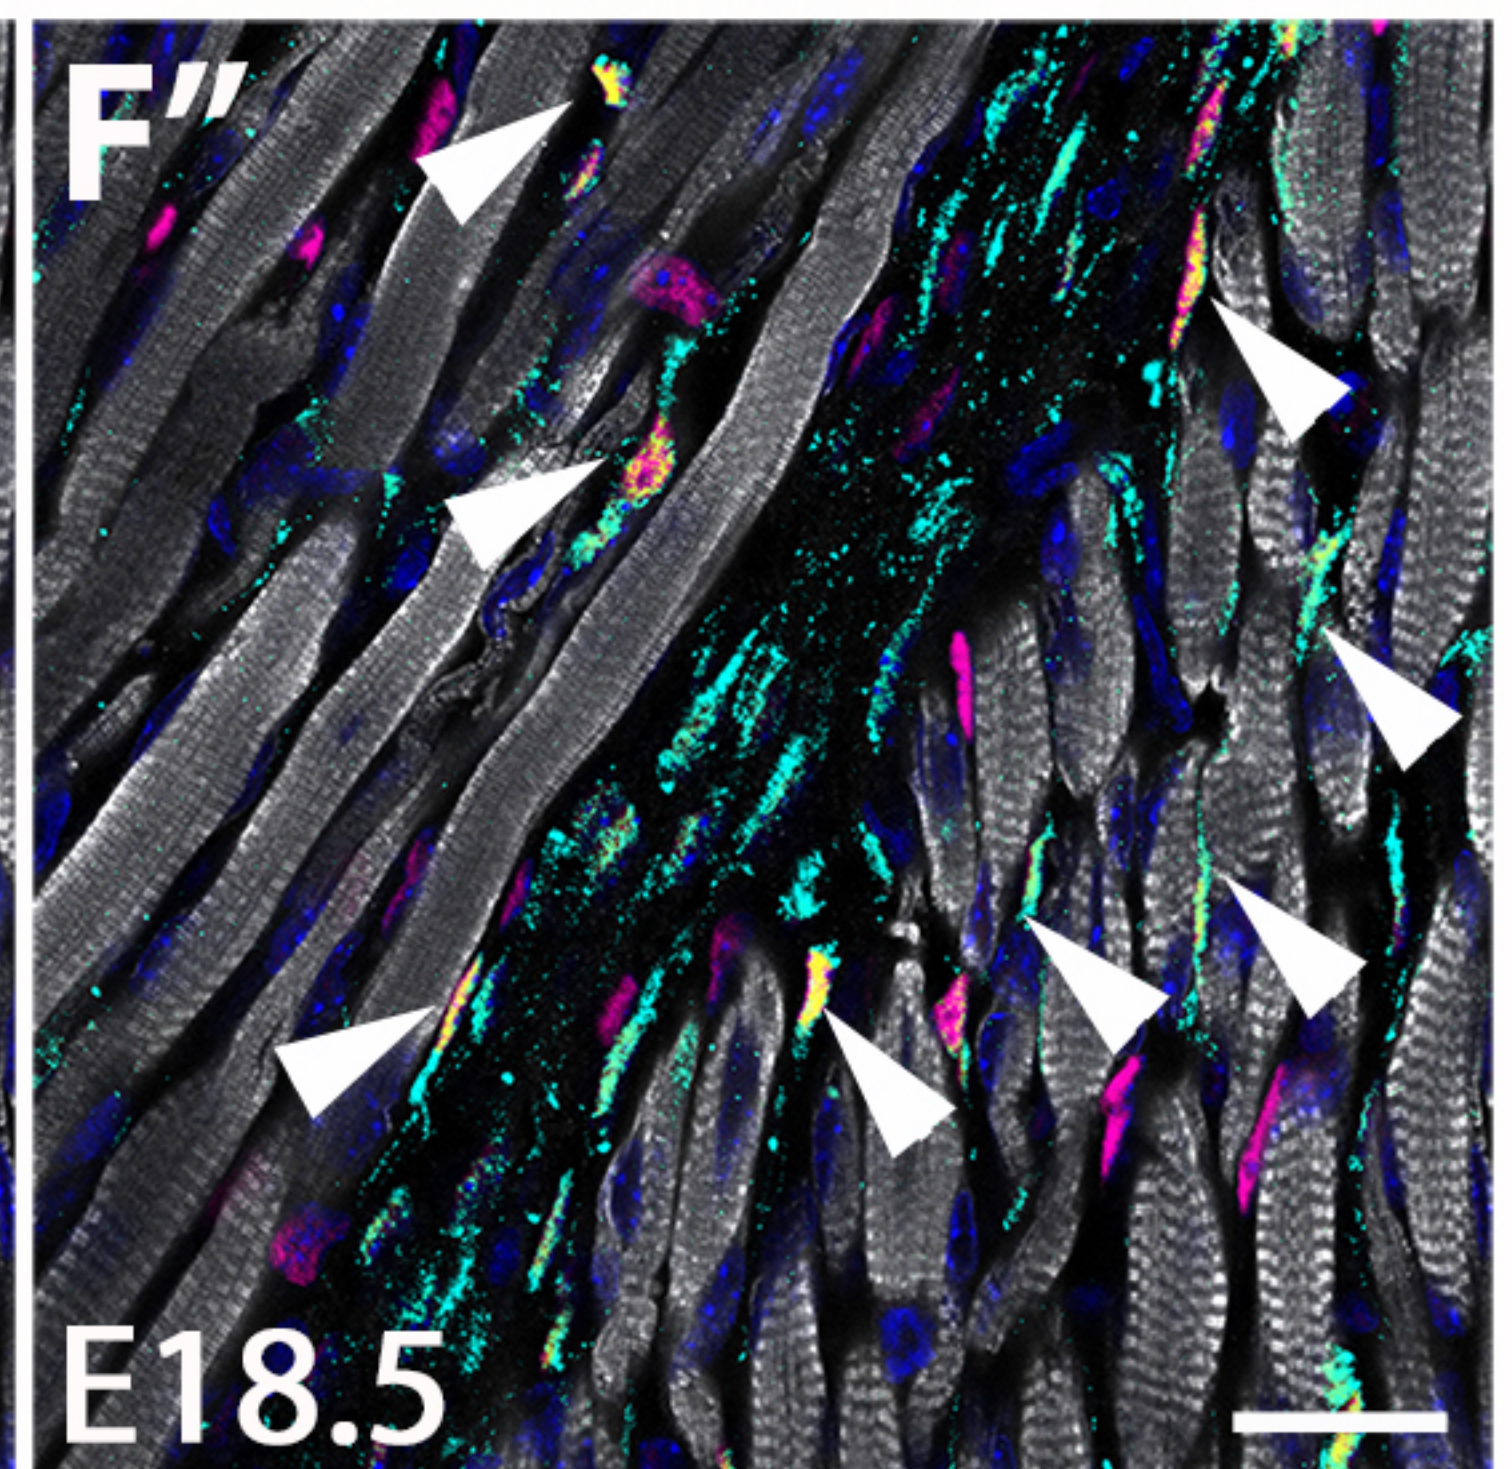

Hoechst  $\beta$ -gal Tnnt3

Hoechst Tcf4 Tnnt3

Merged

Figure 4

**Ctrl*****Tbx1*<sup>-/-</sup>*****Pax3*<sup>-/-</sup>**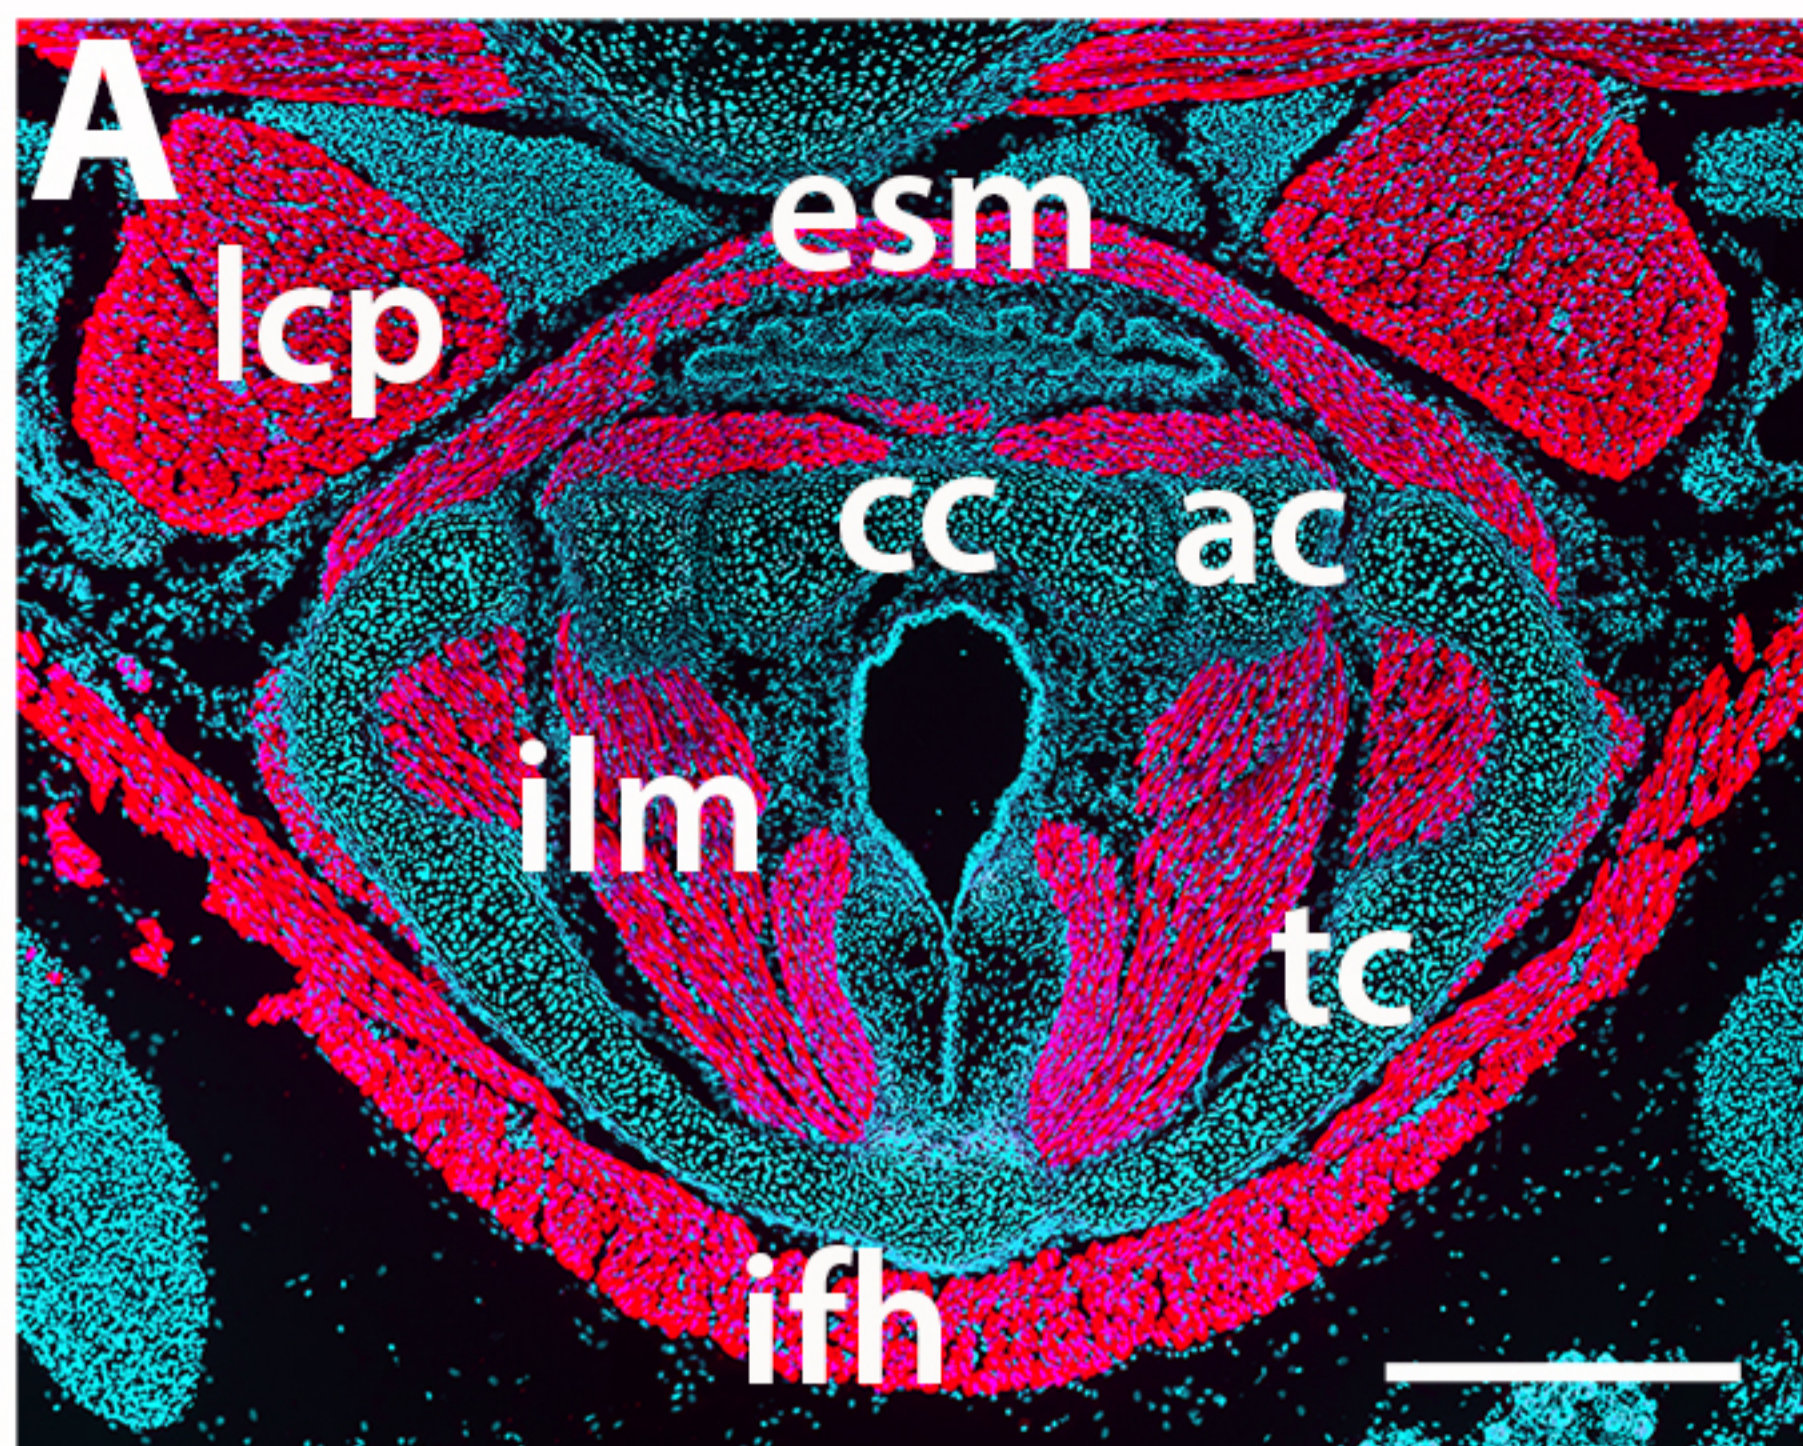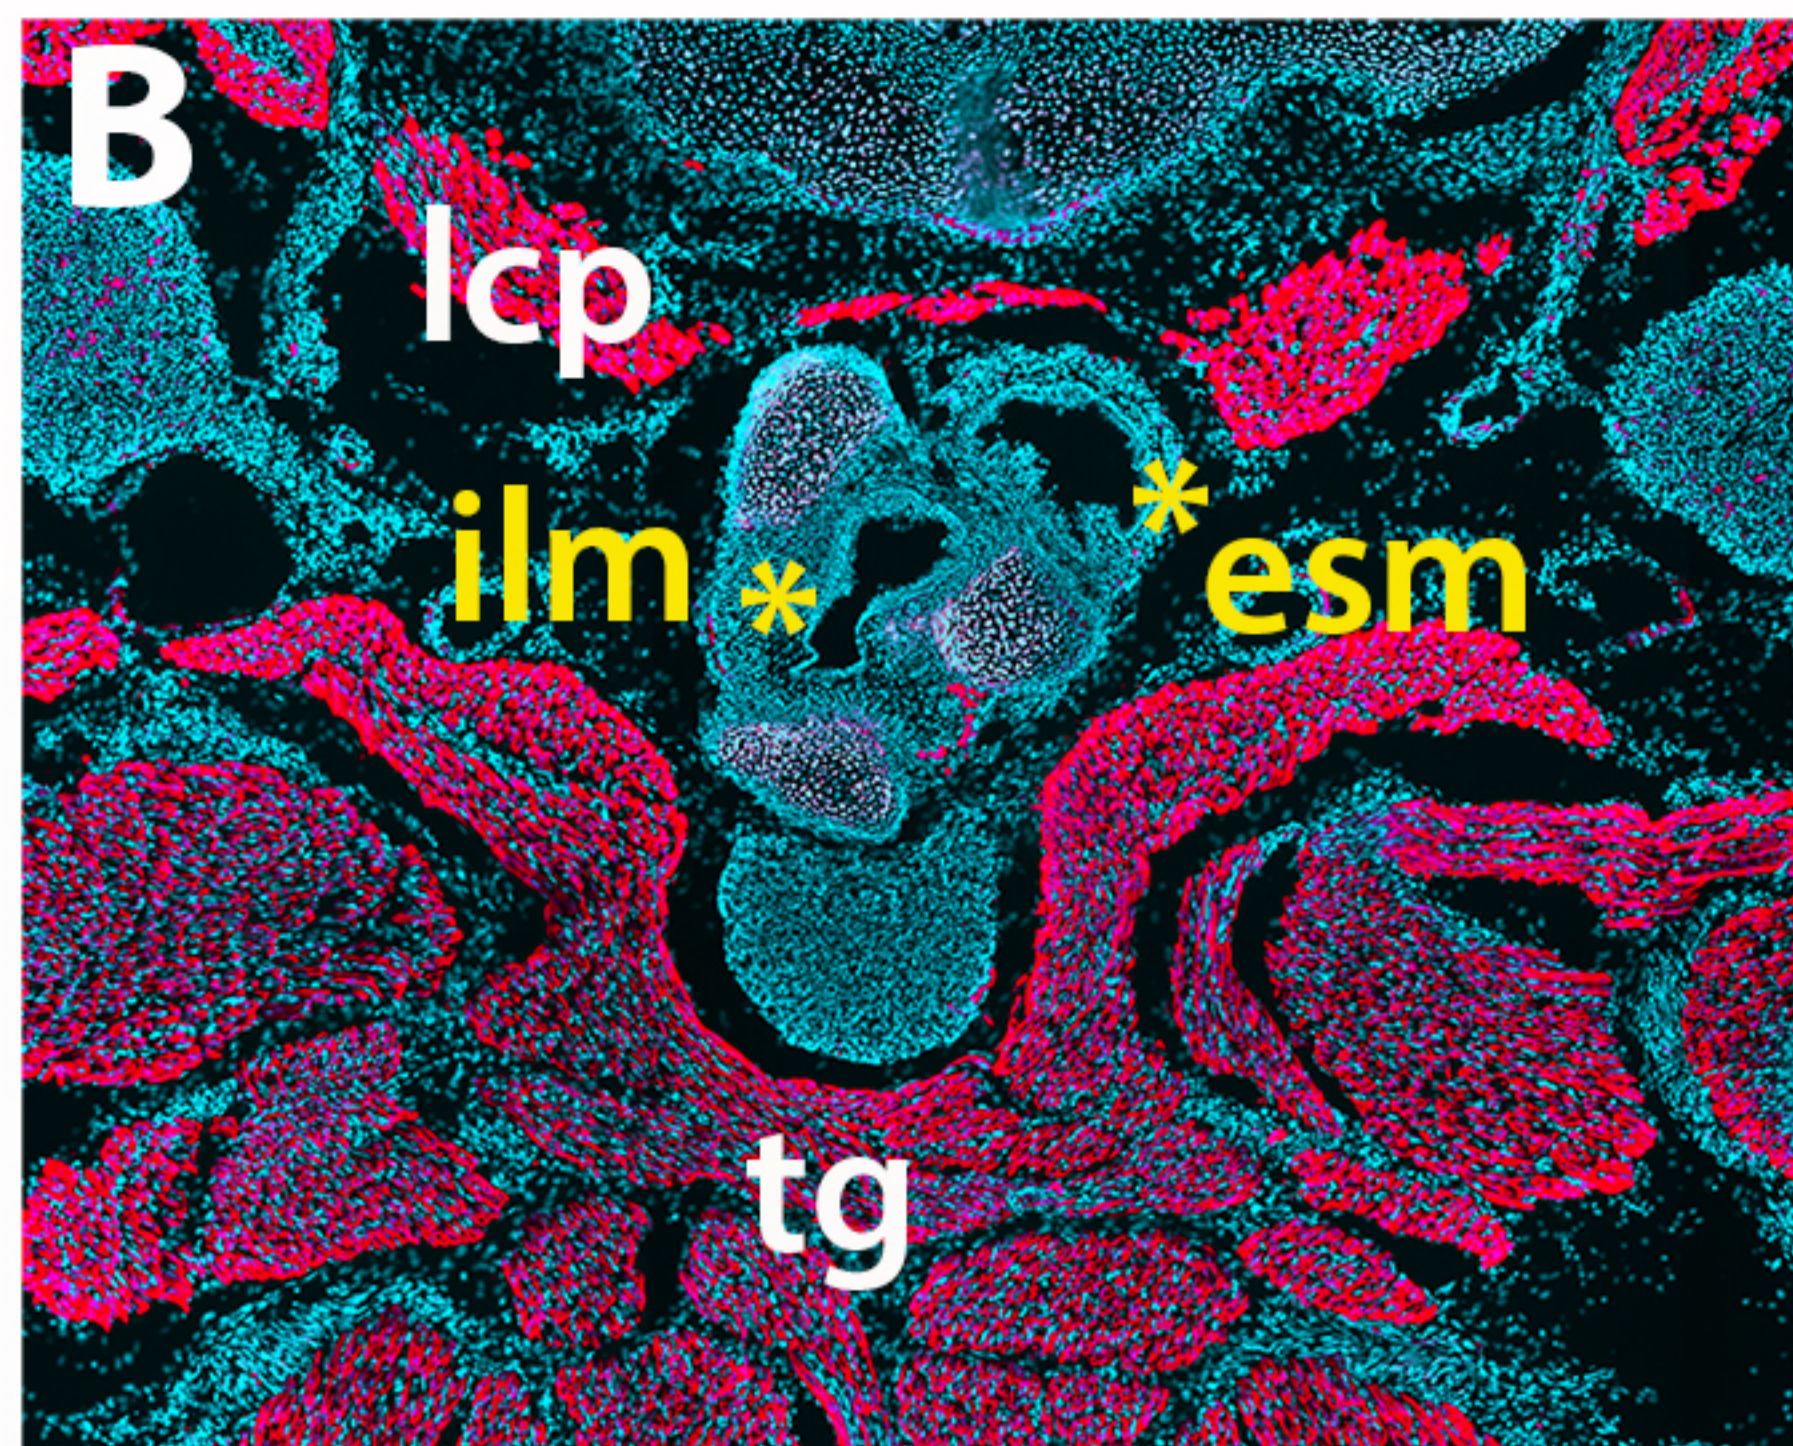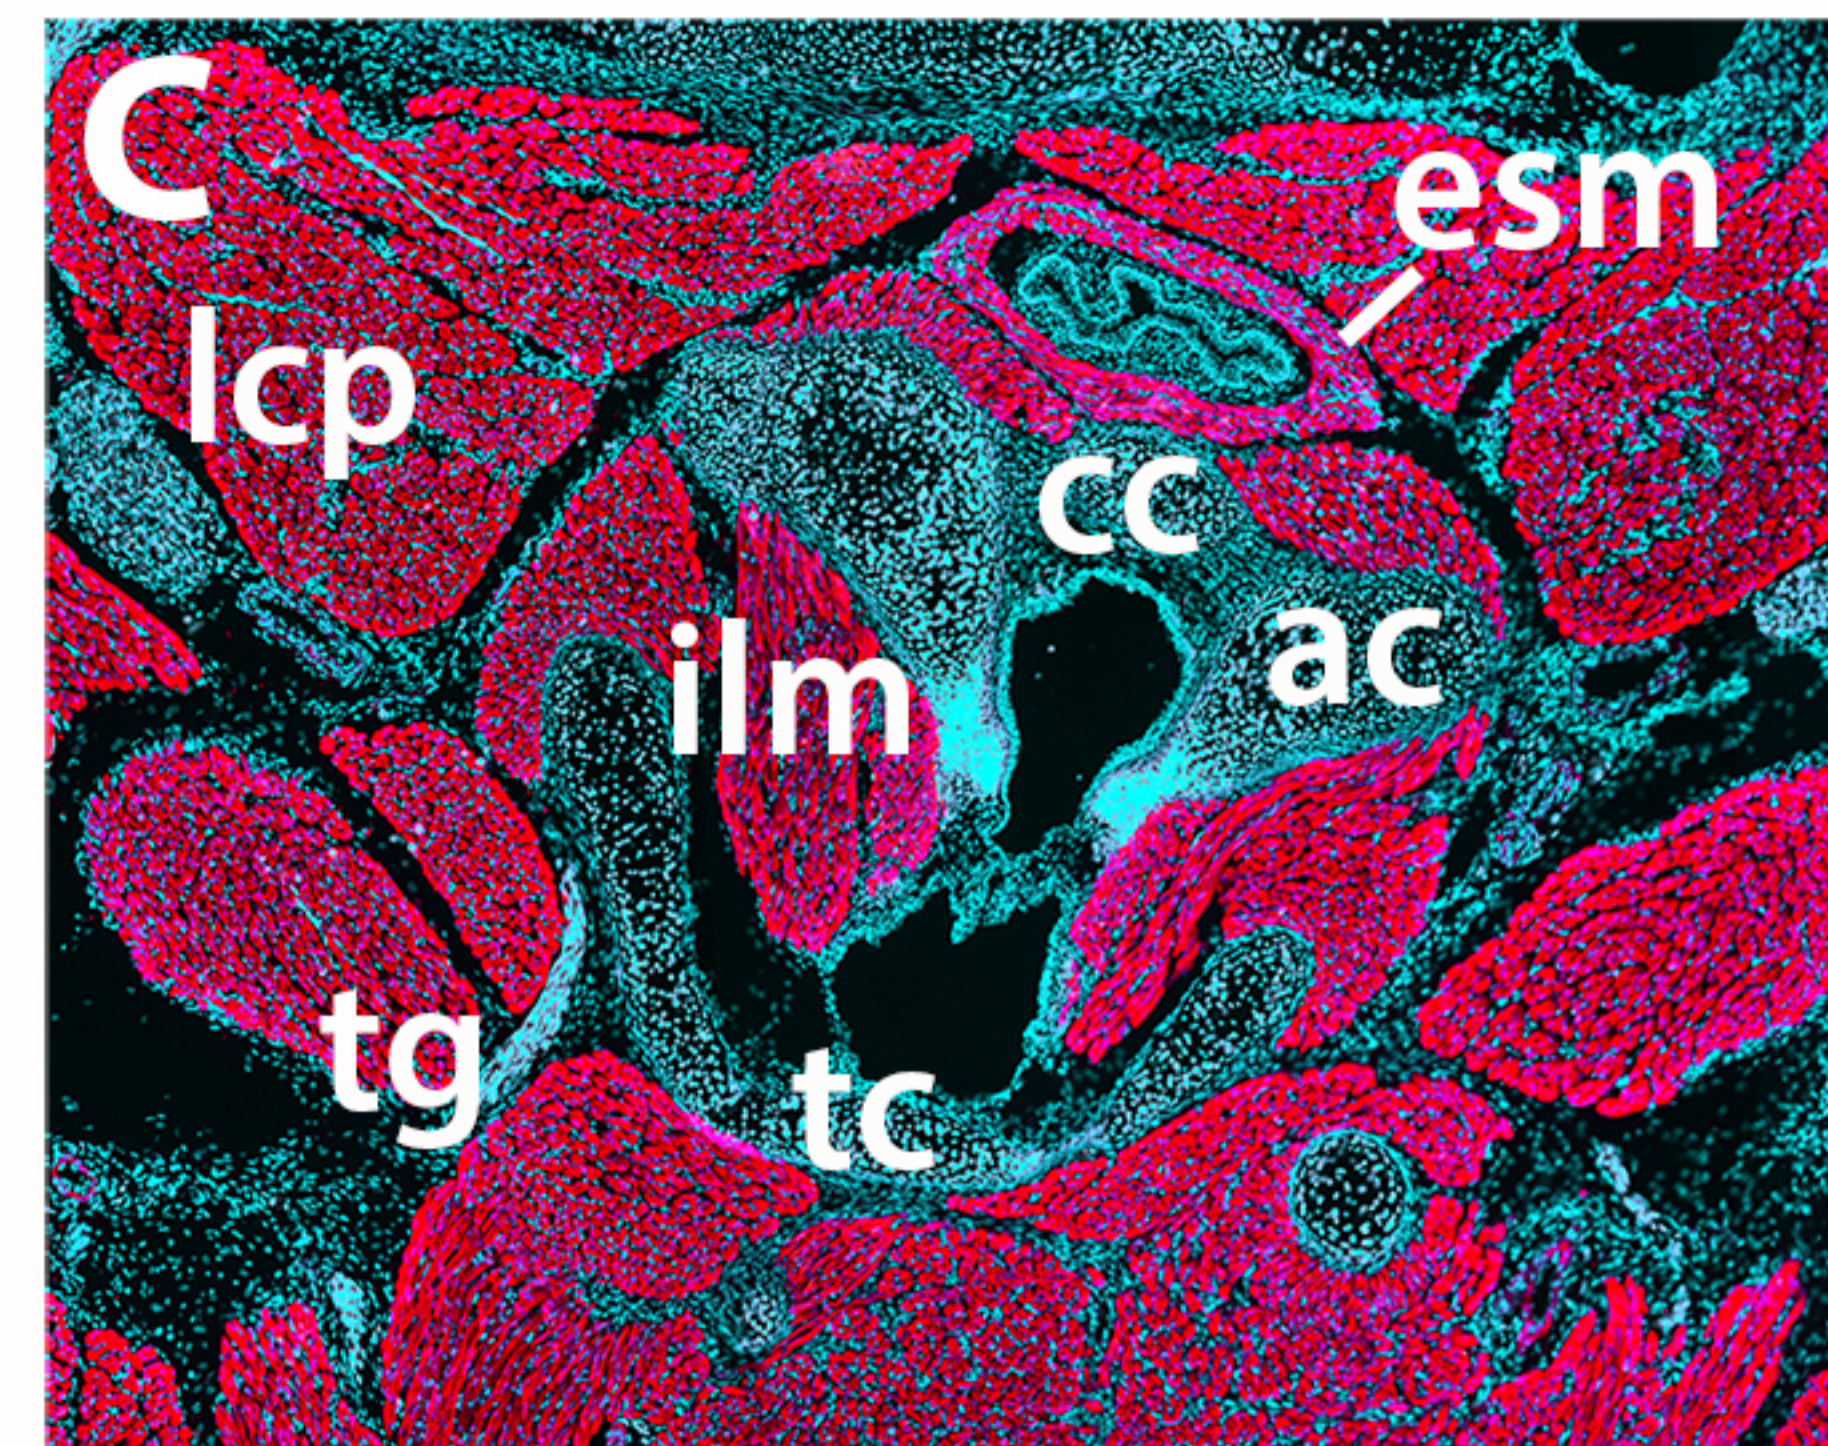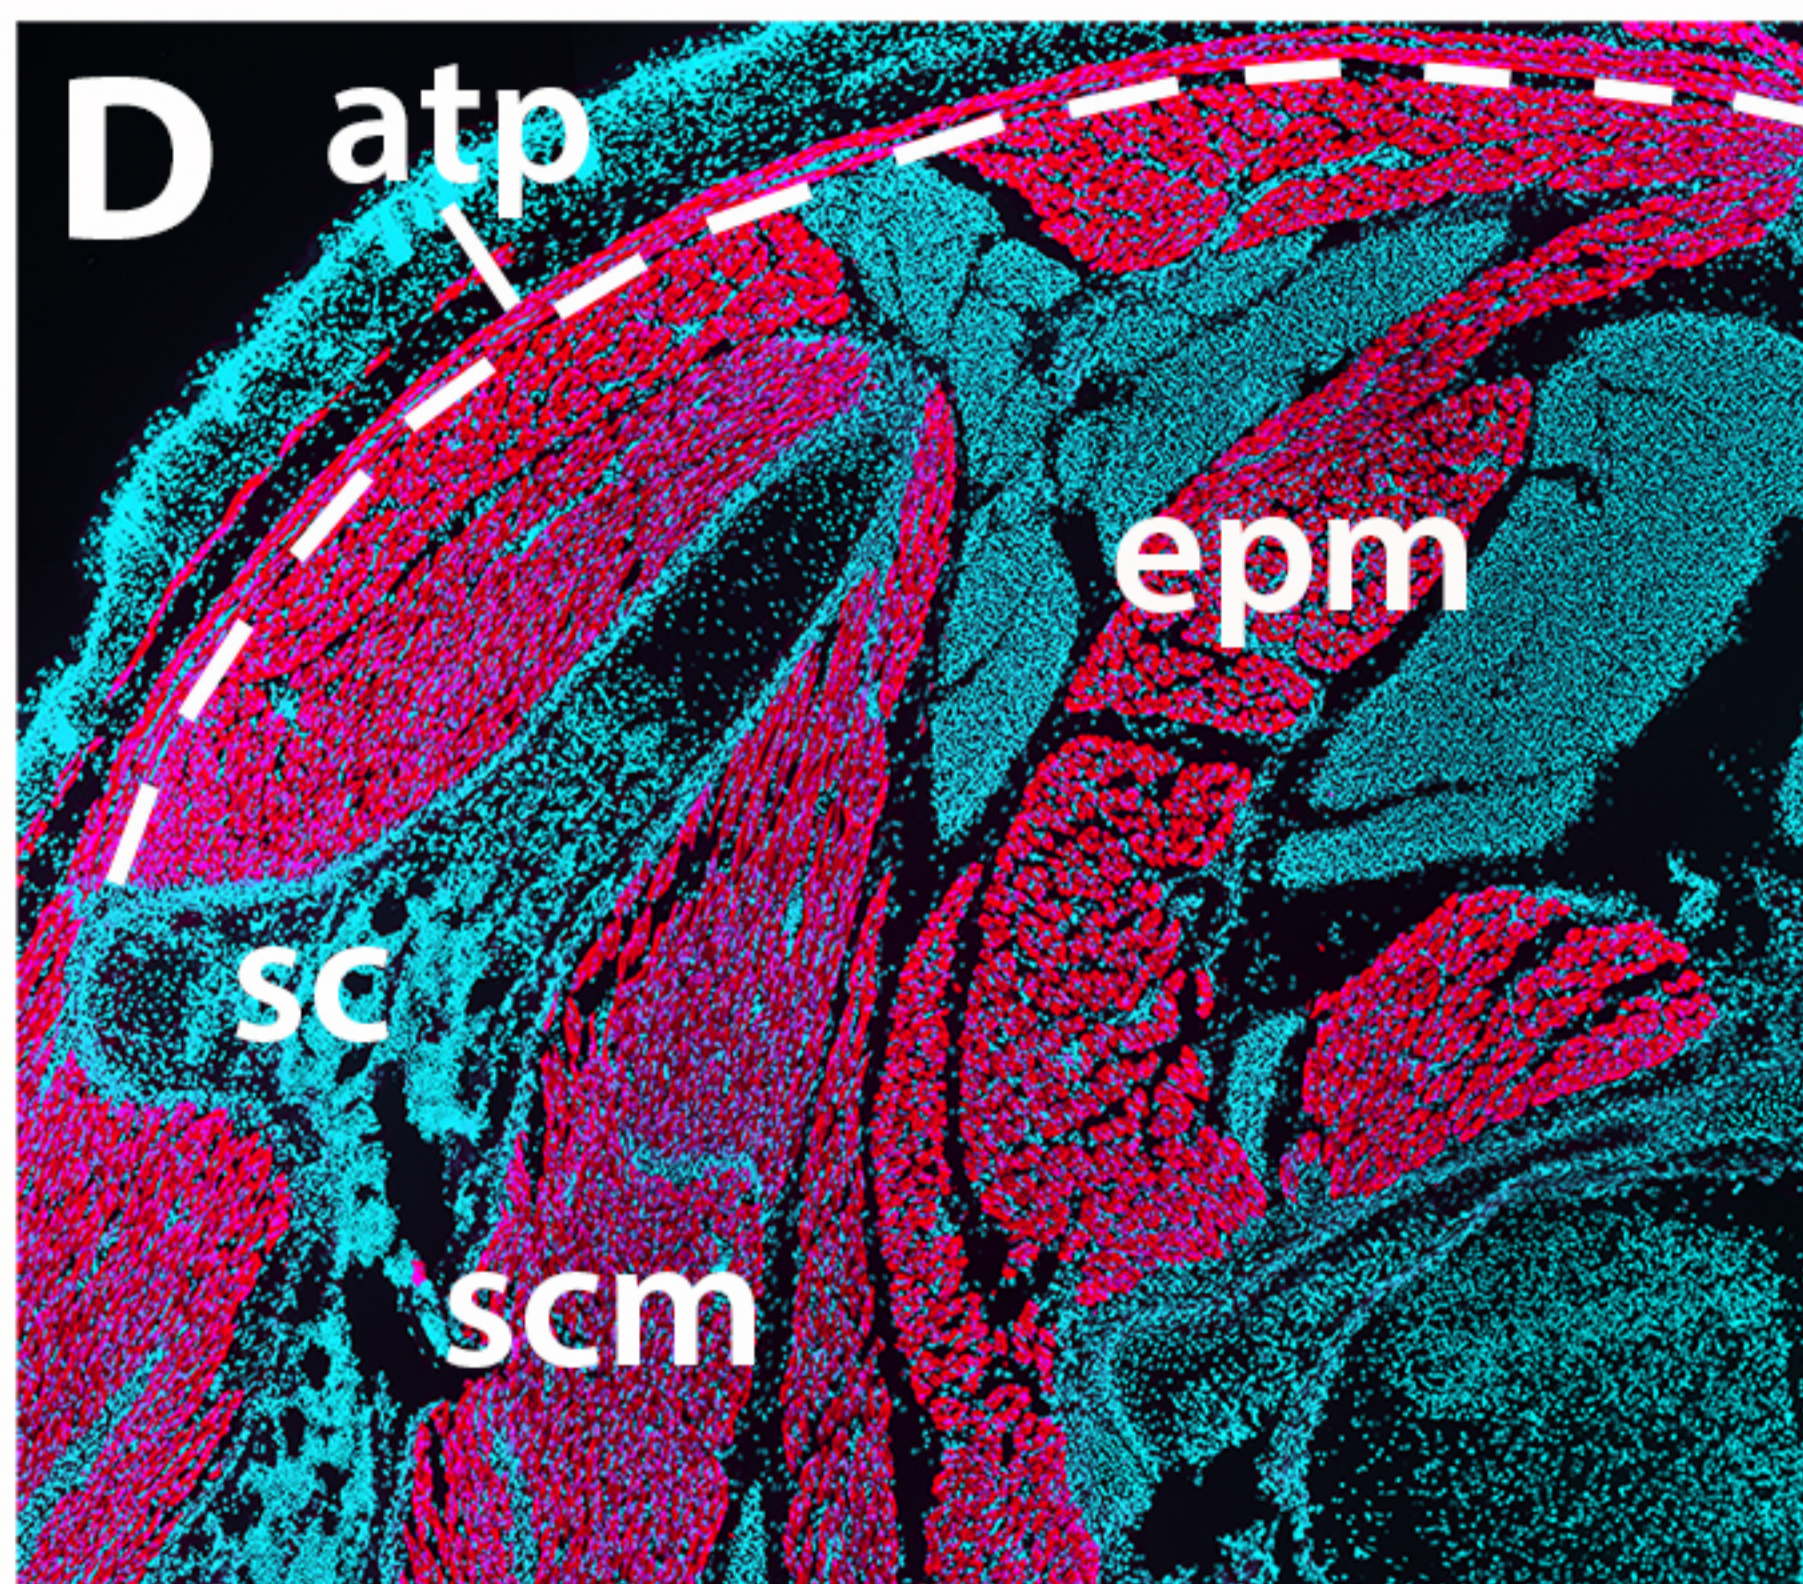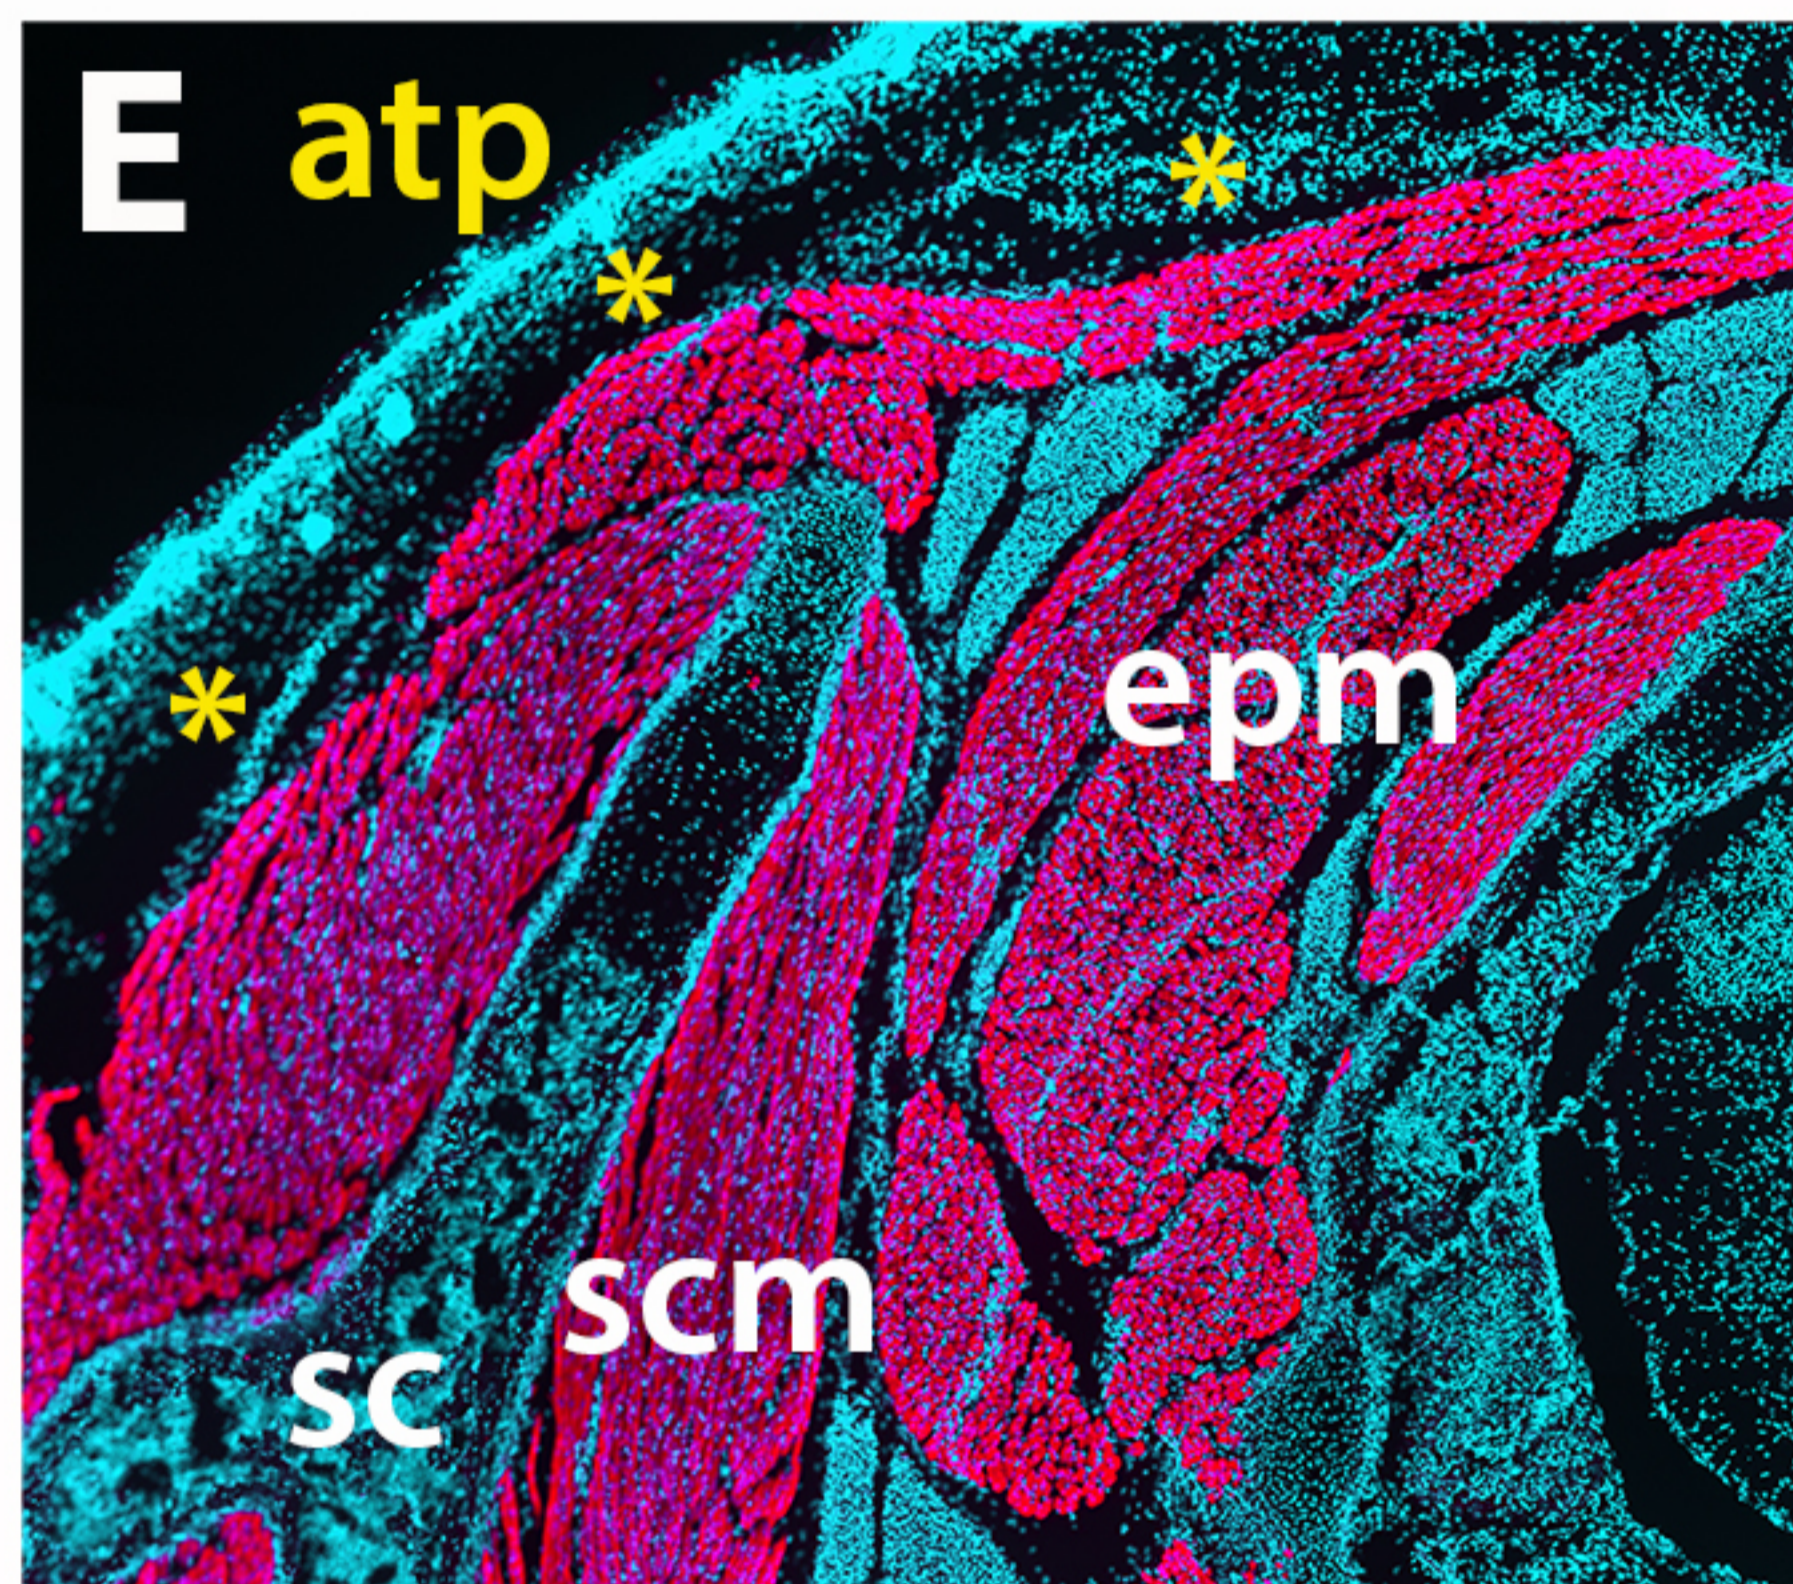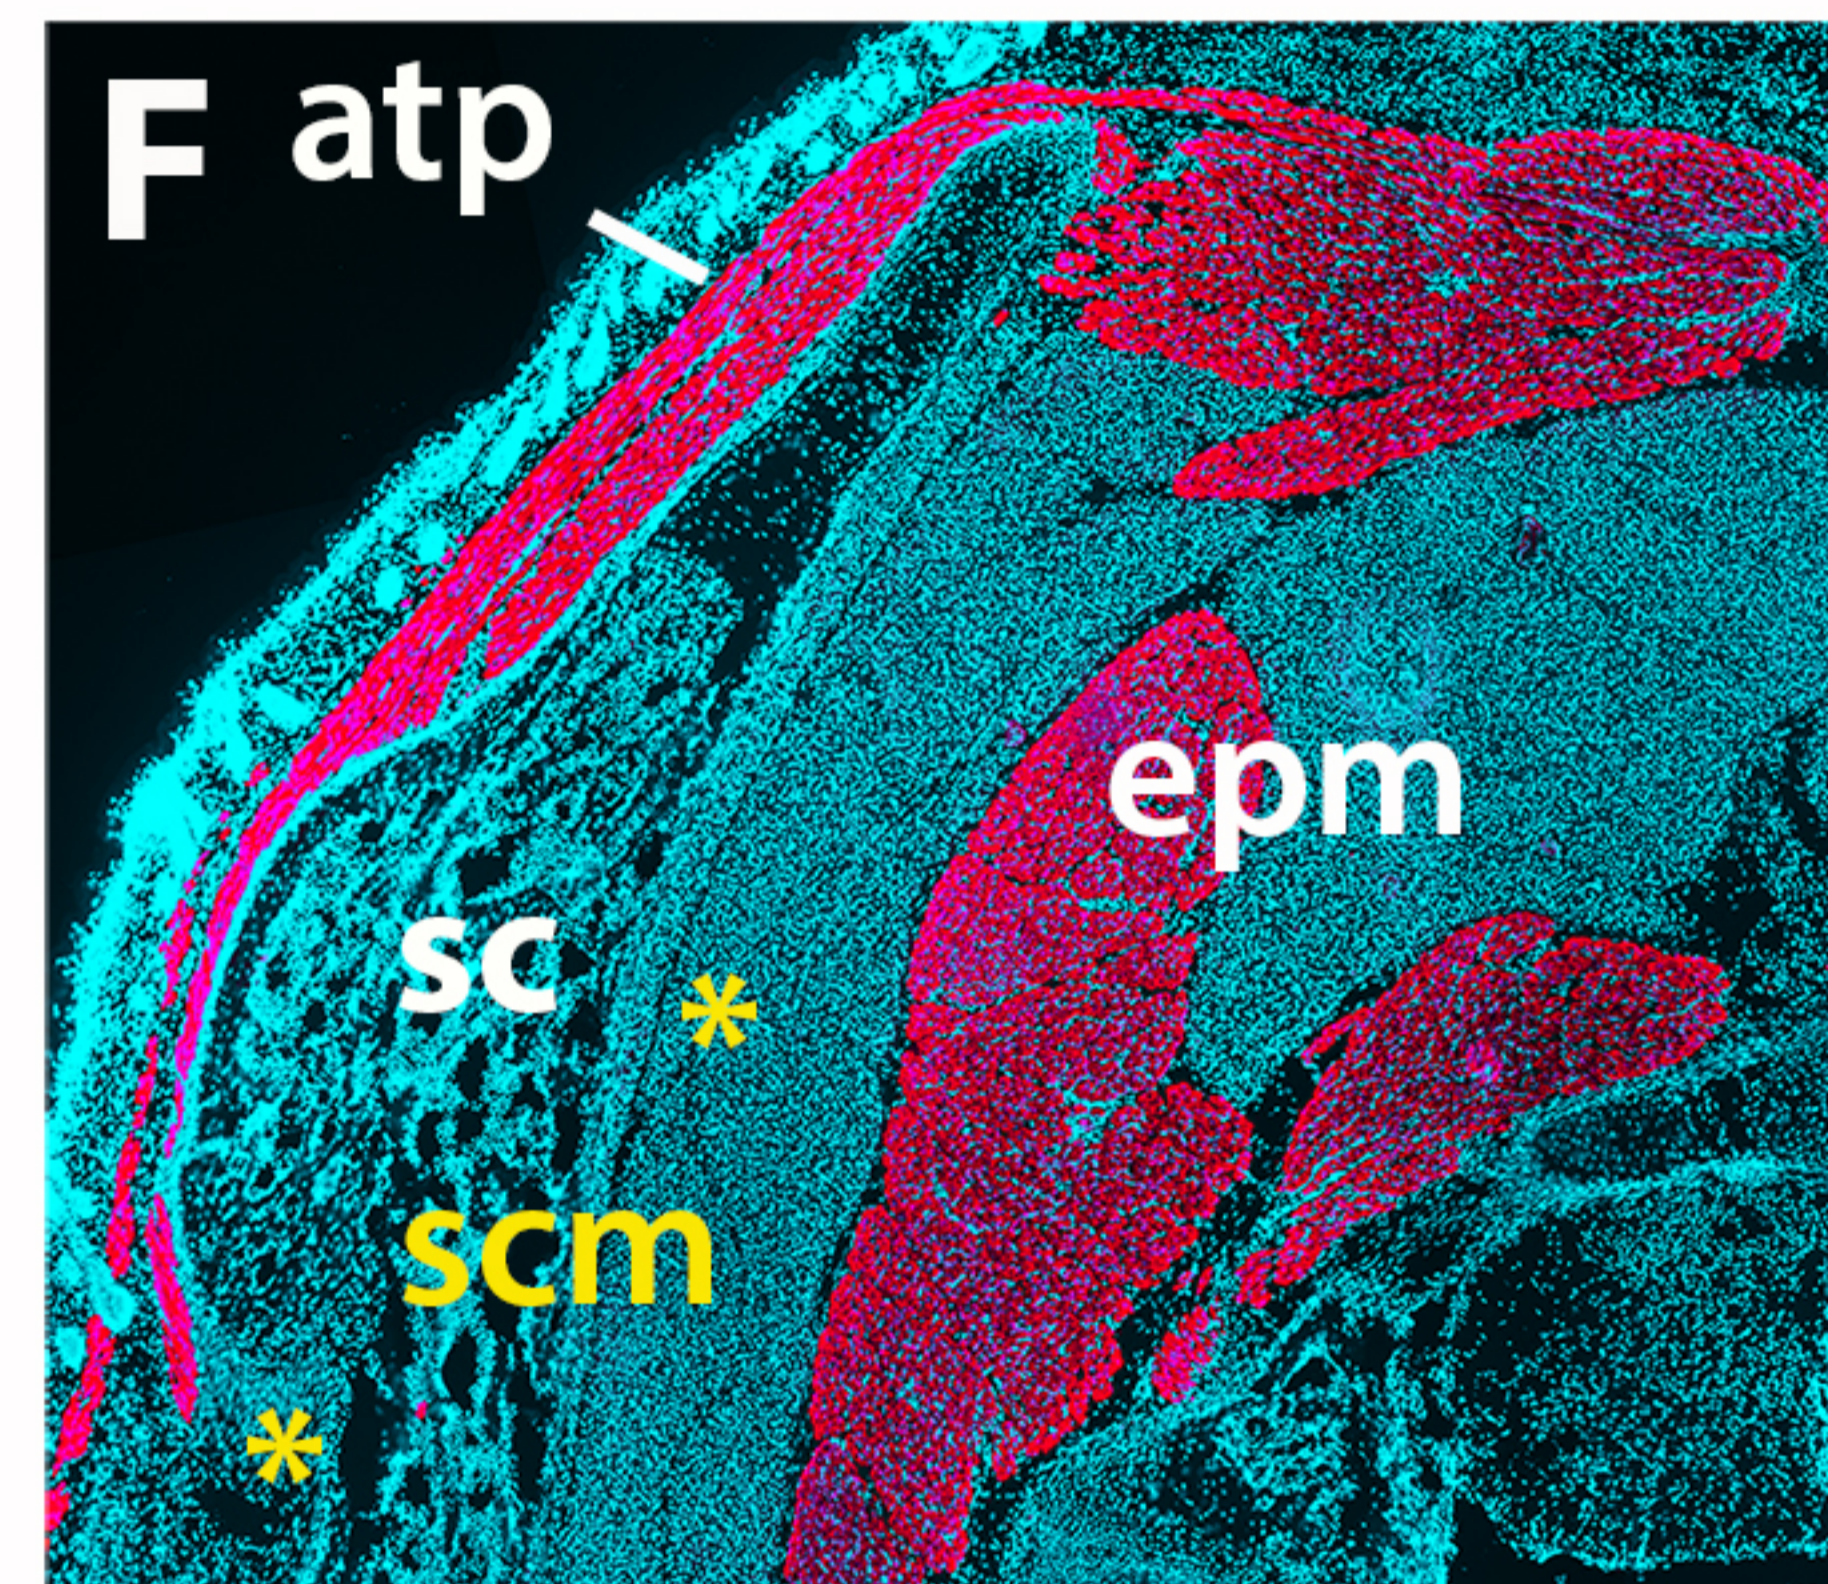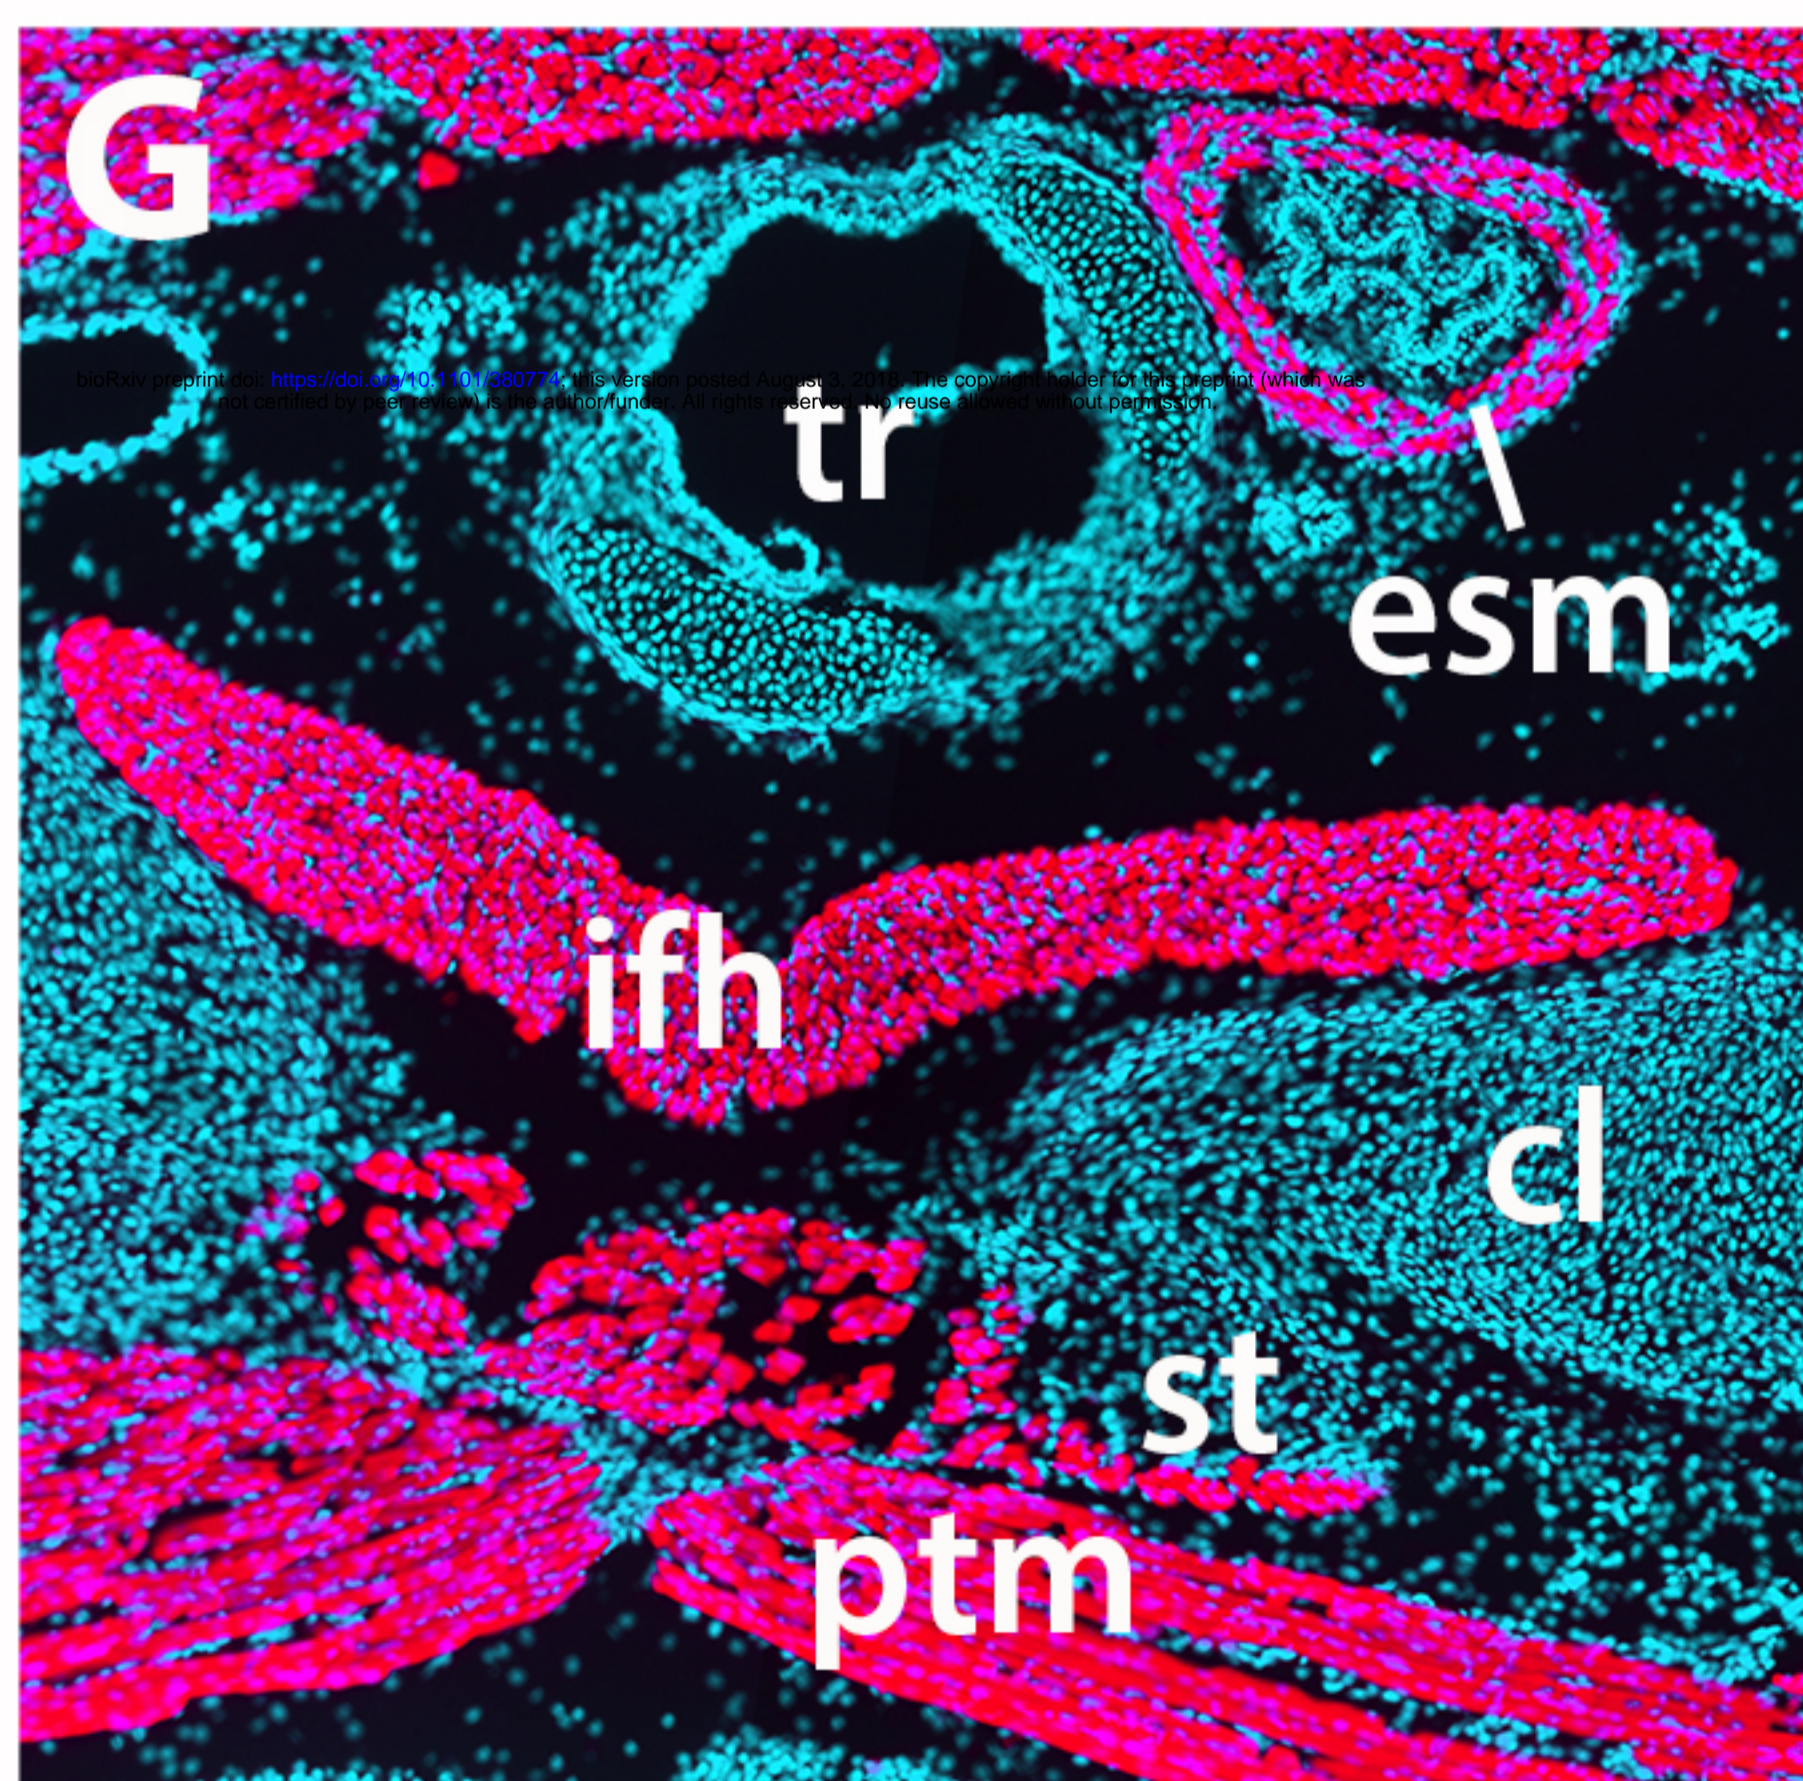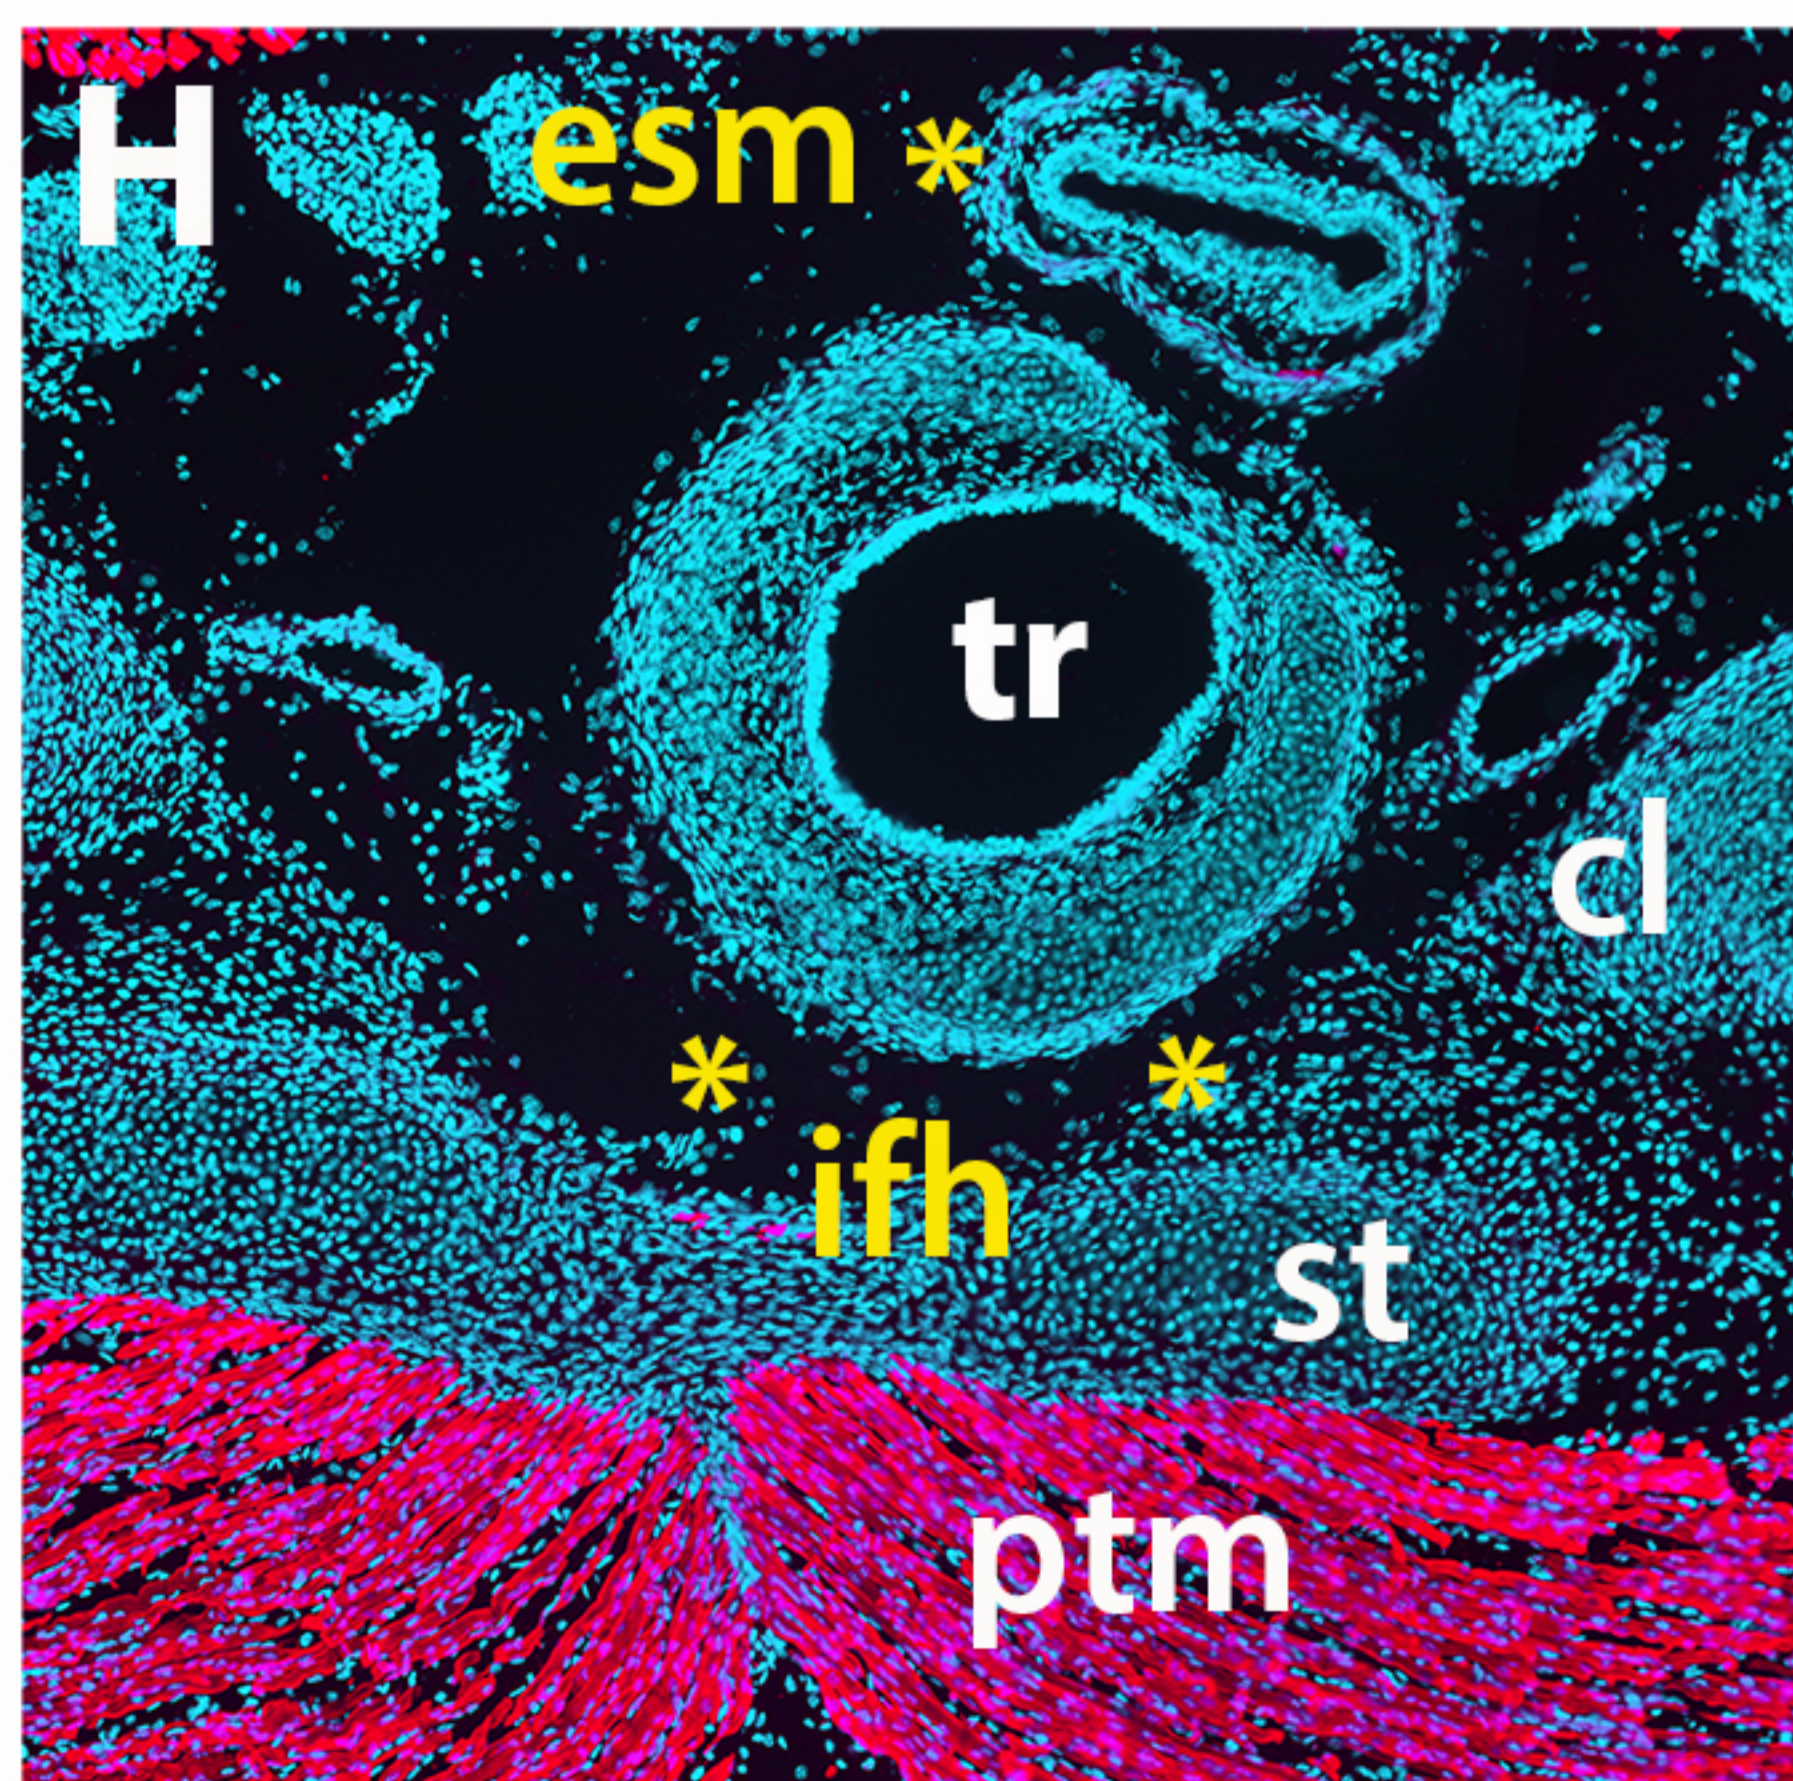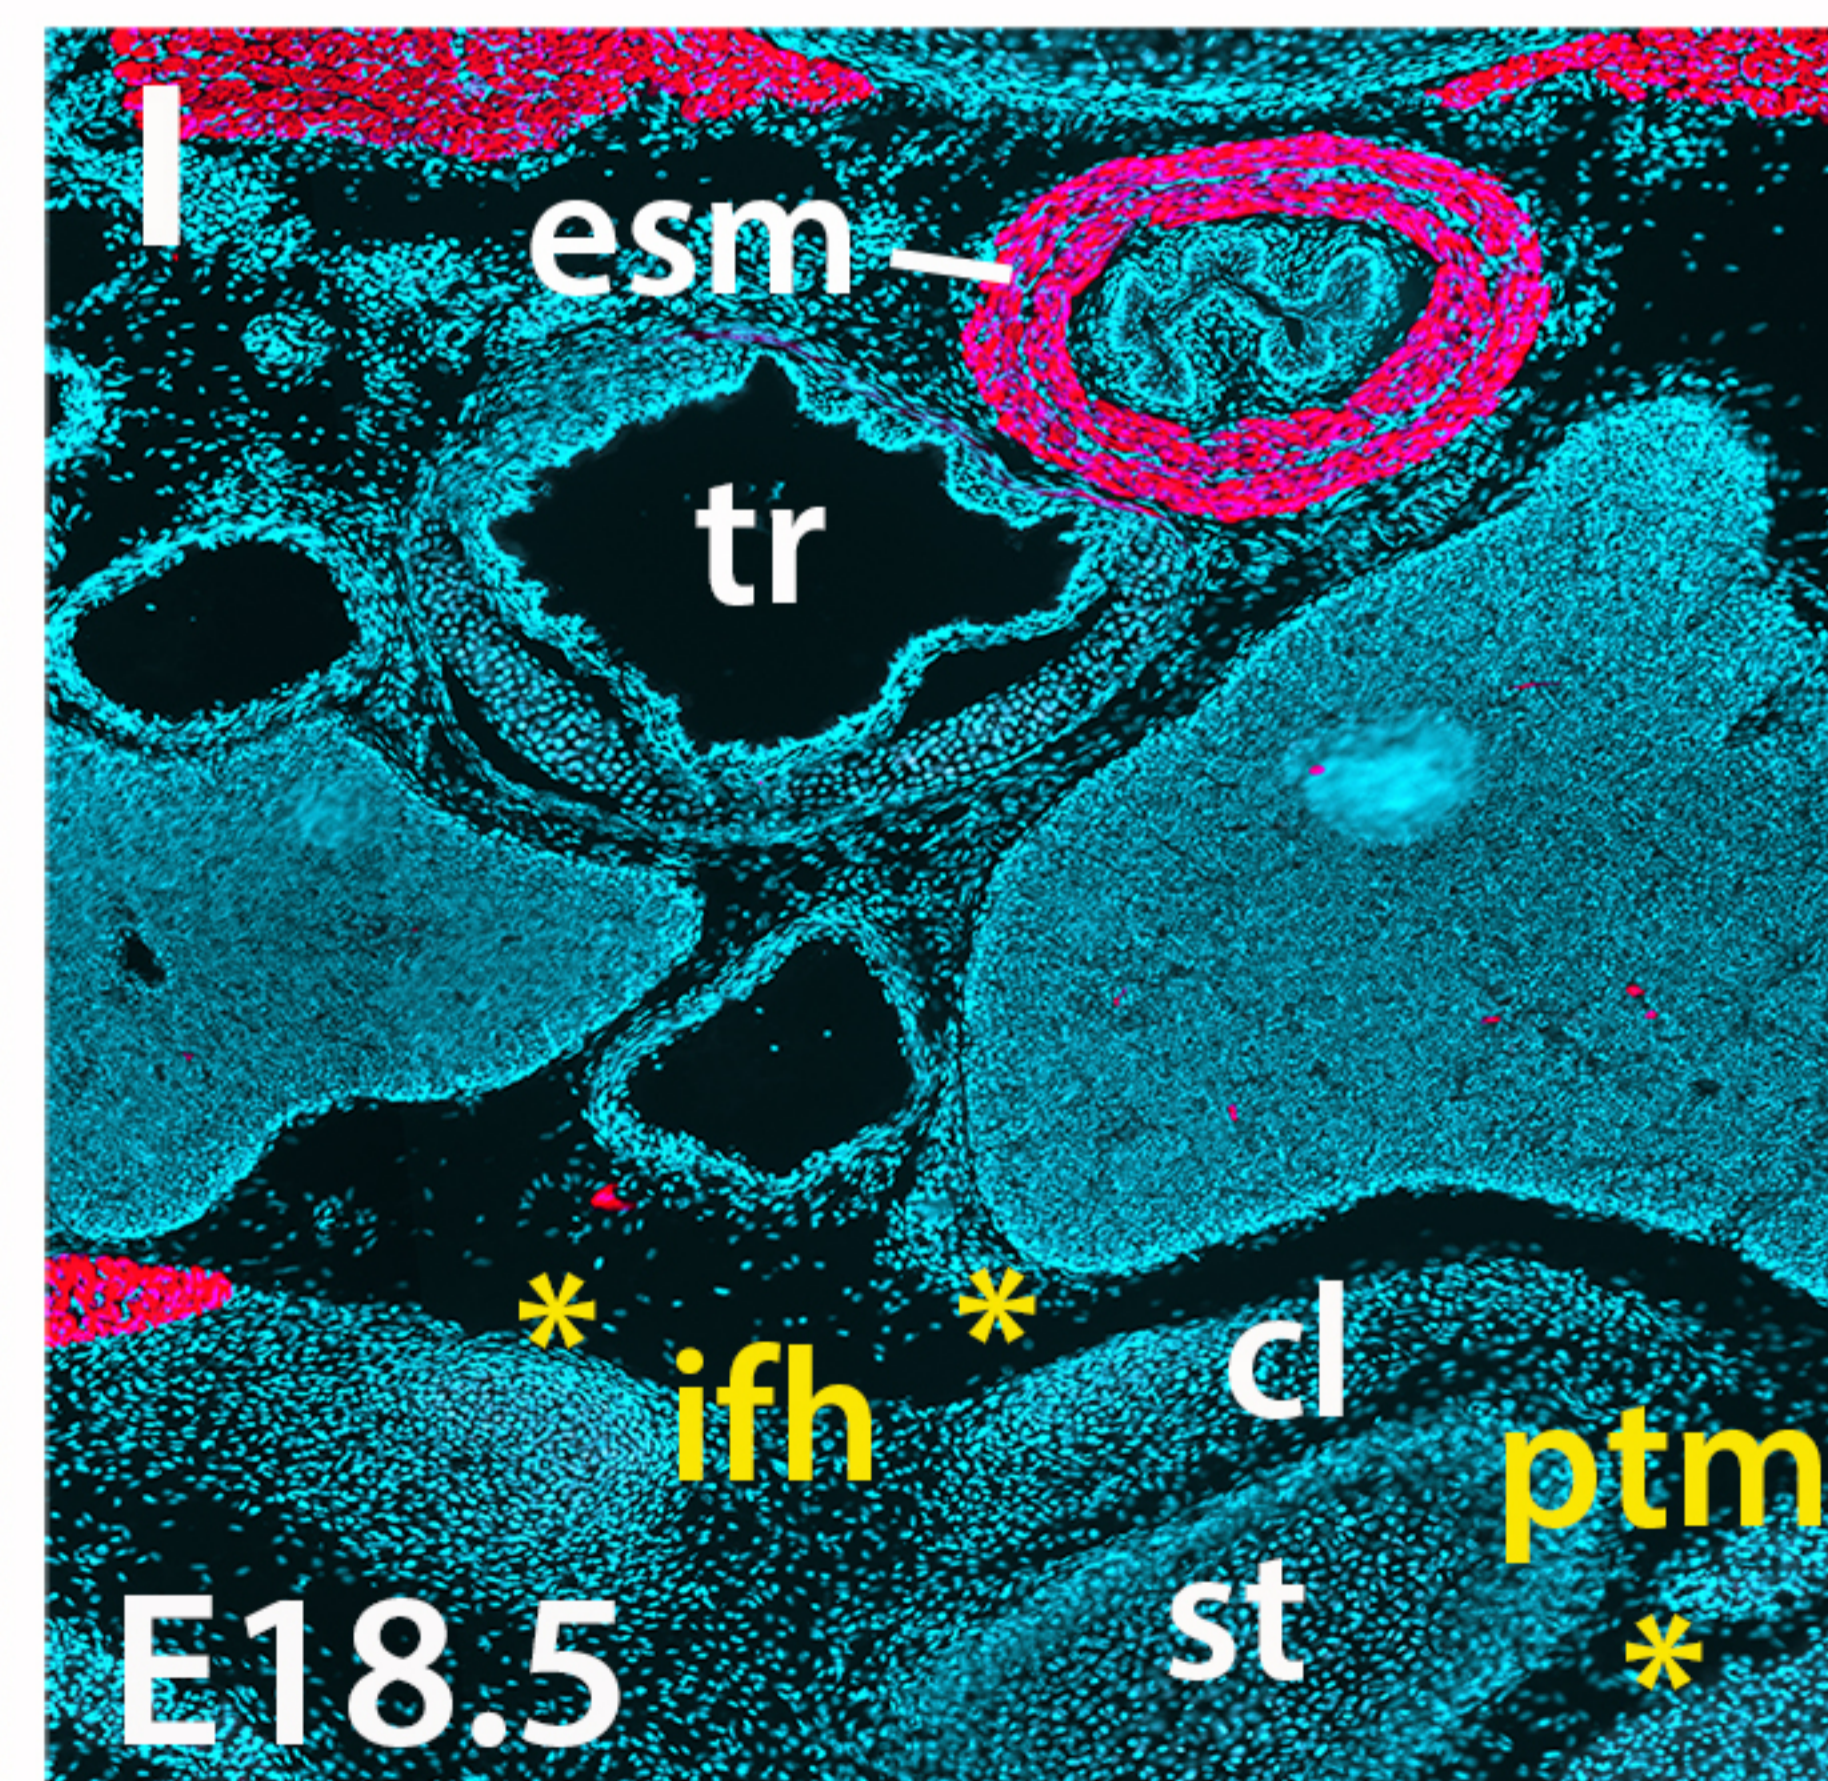

Hoechst Tnnt3

**Figure 5**

**Ctrl*****Tbx1*<sup>-/-</sup>*****Pax3*<sup>-/-</sup>**

ventral

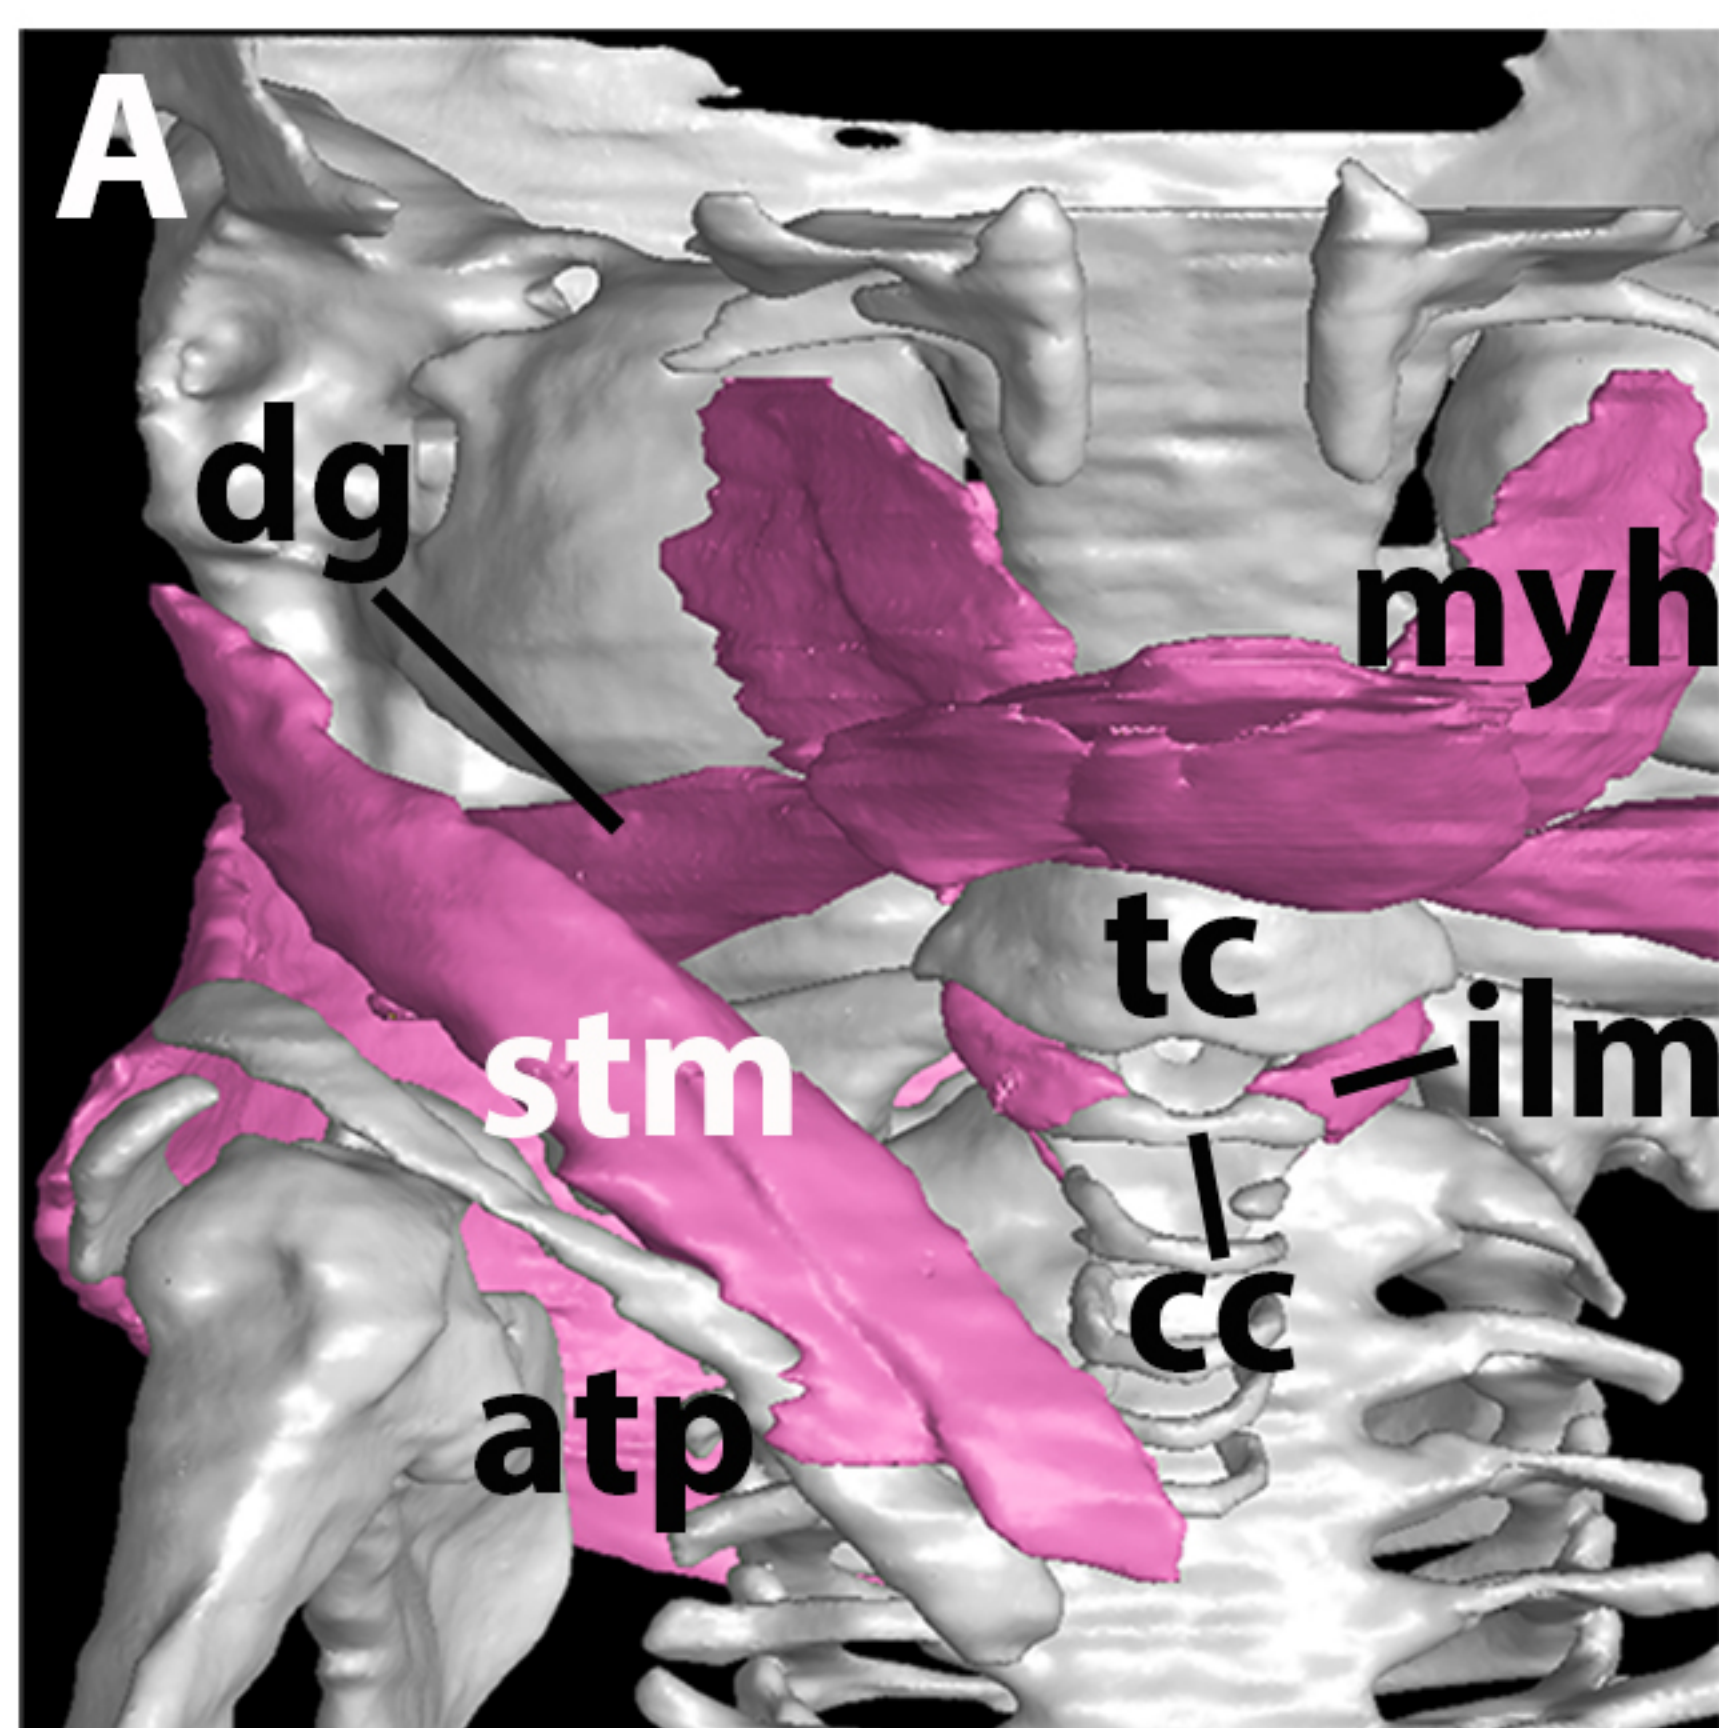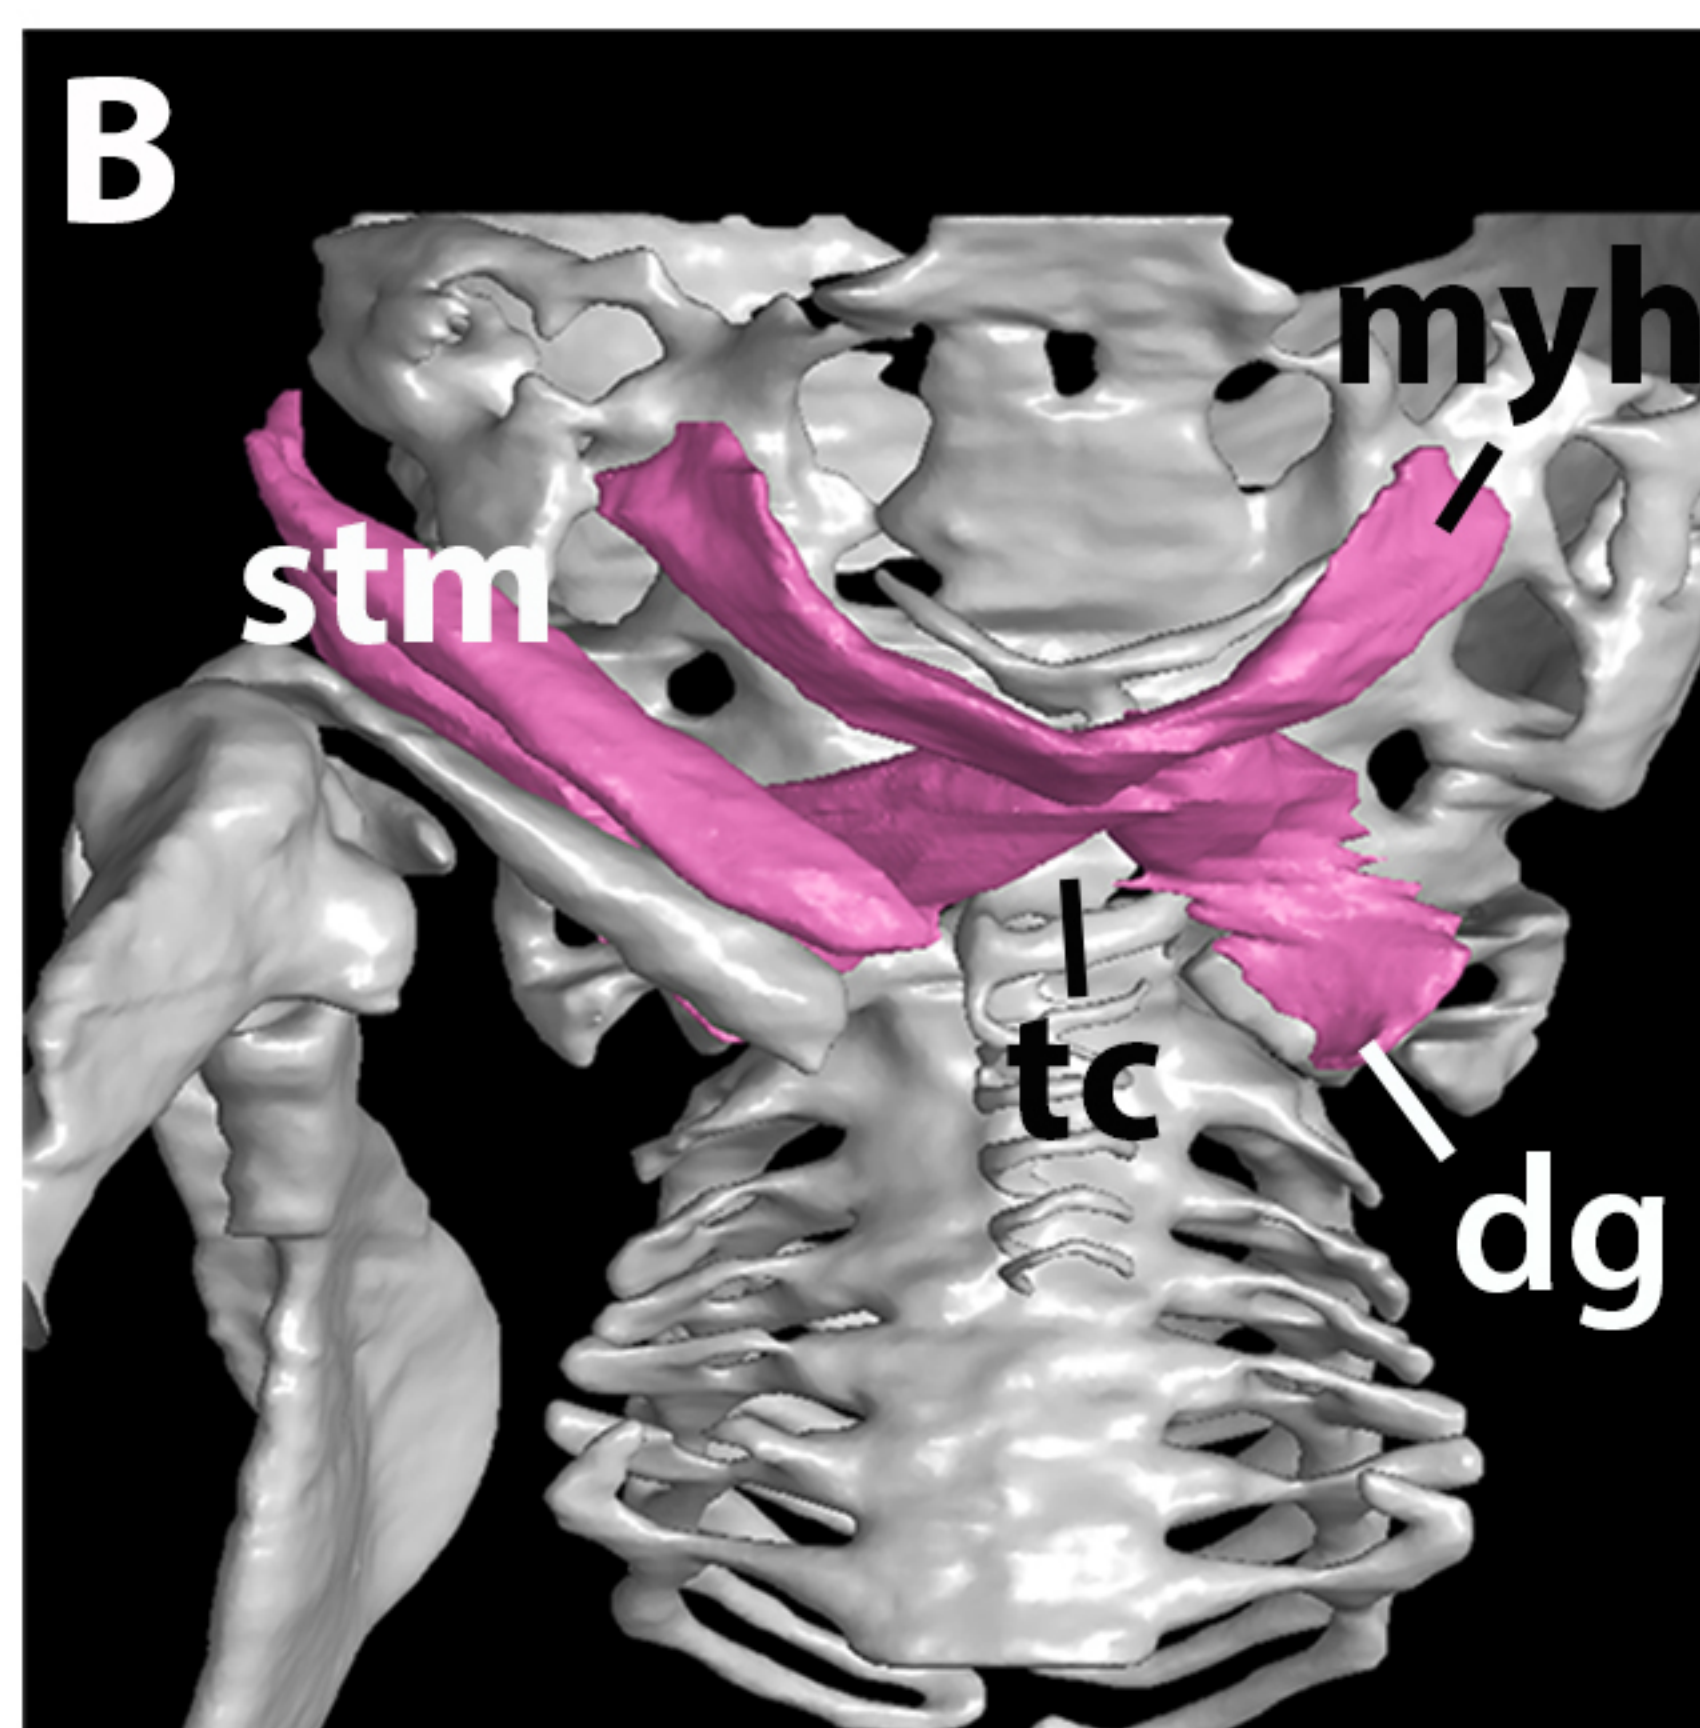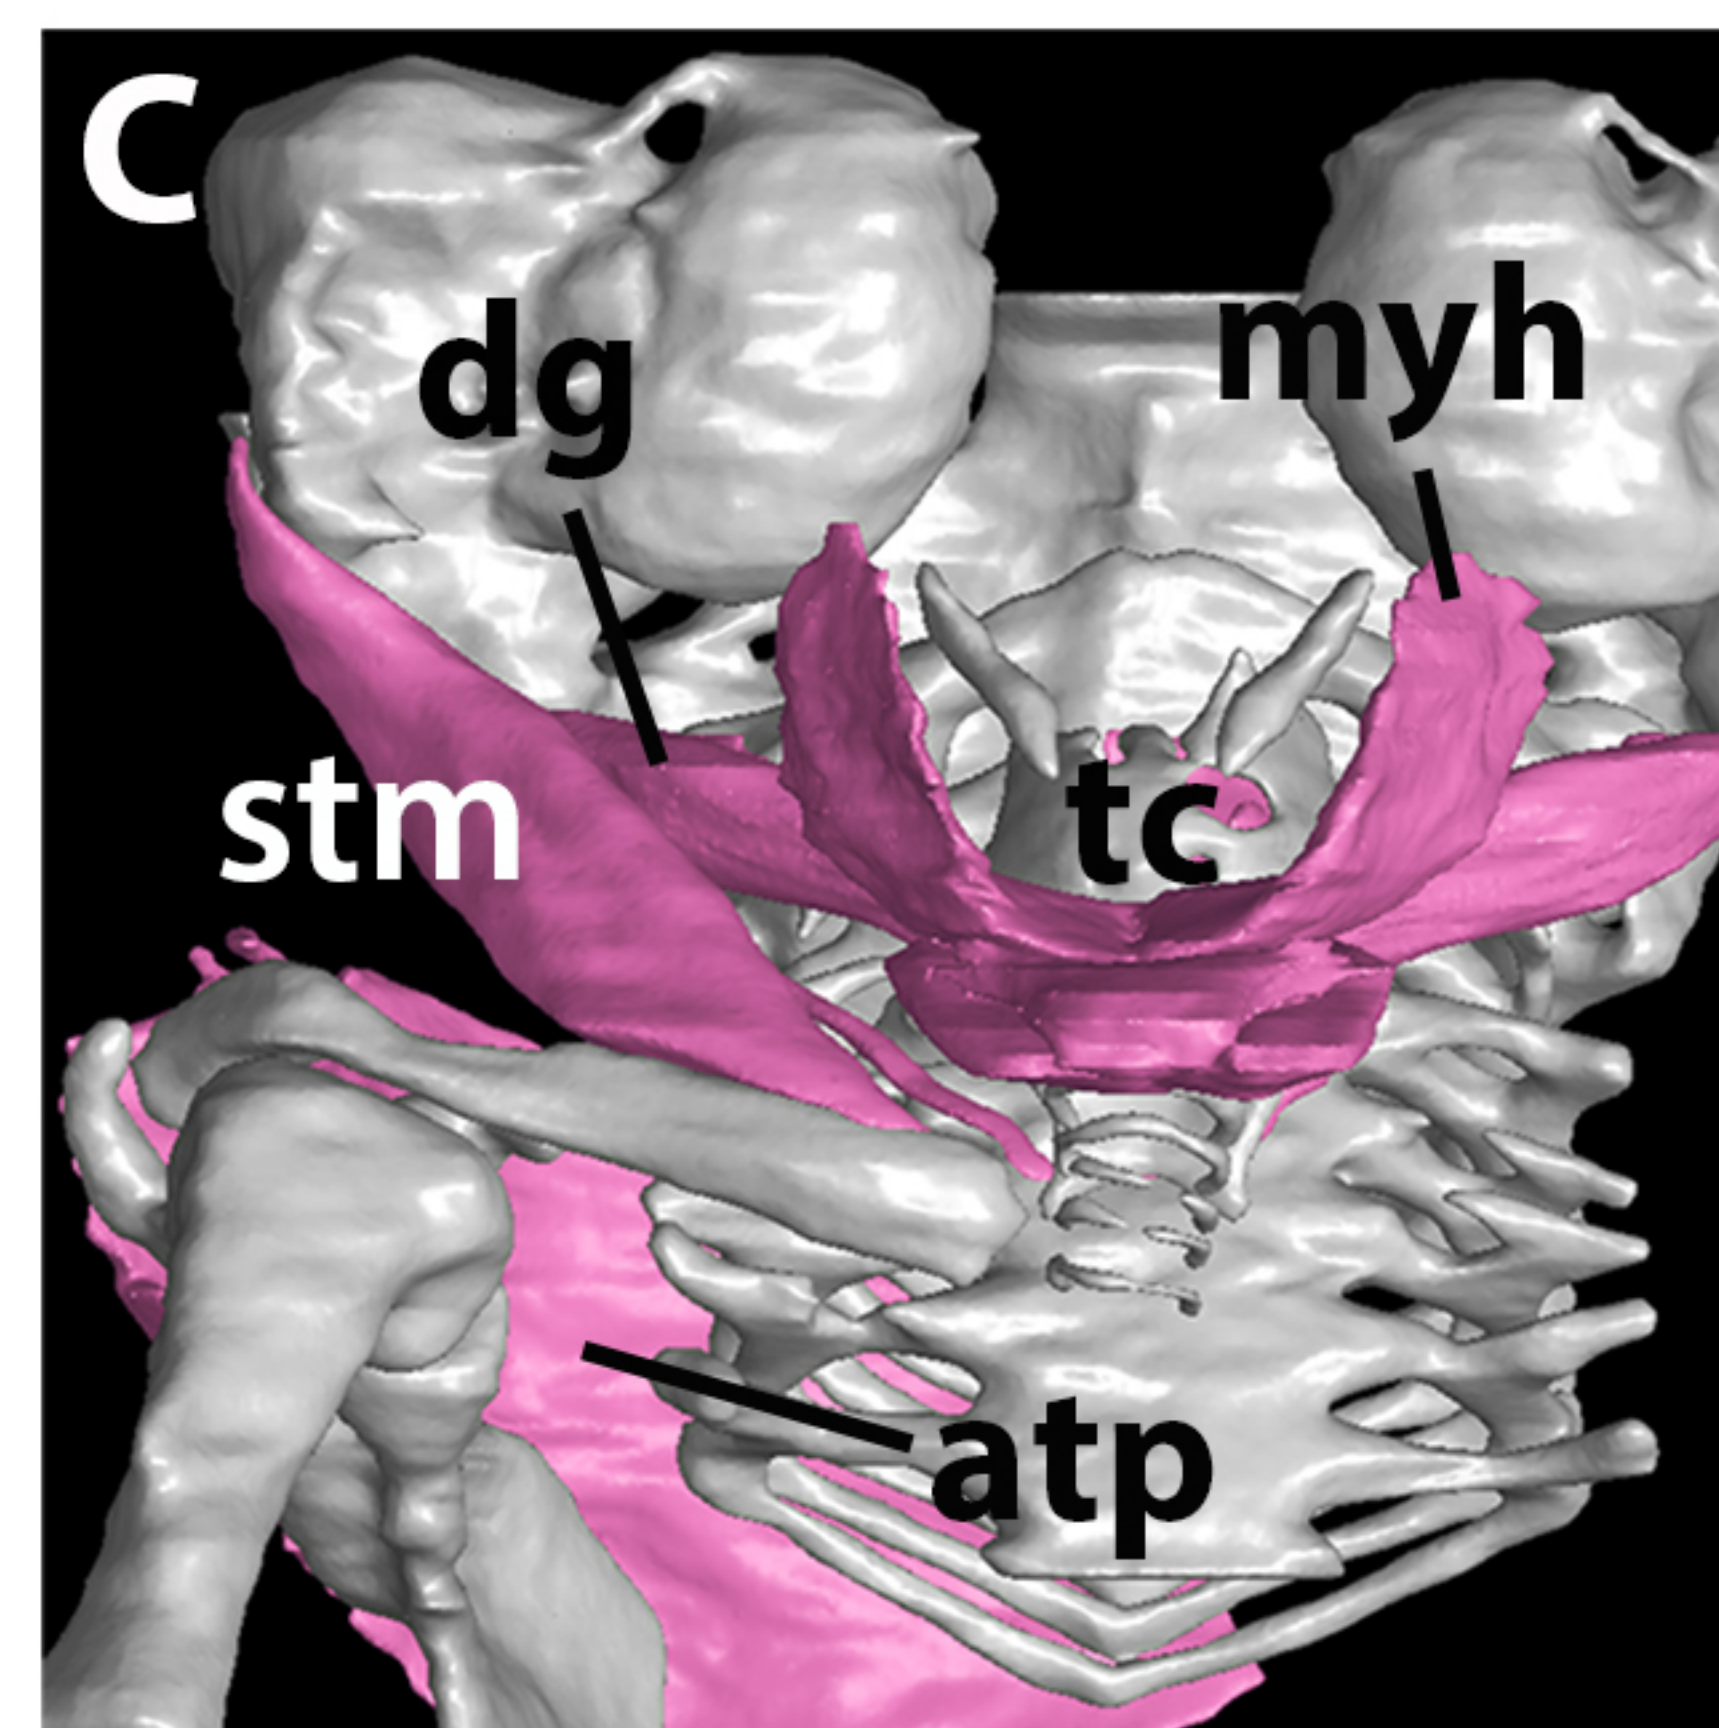

ventral

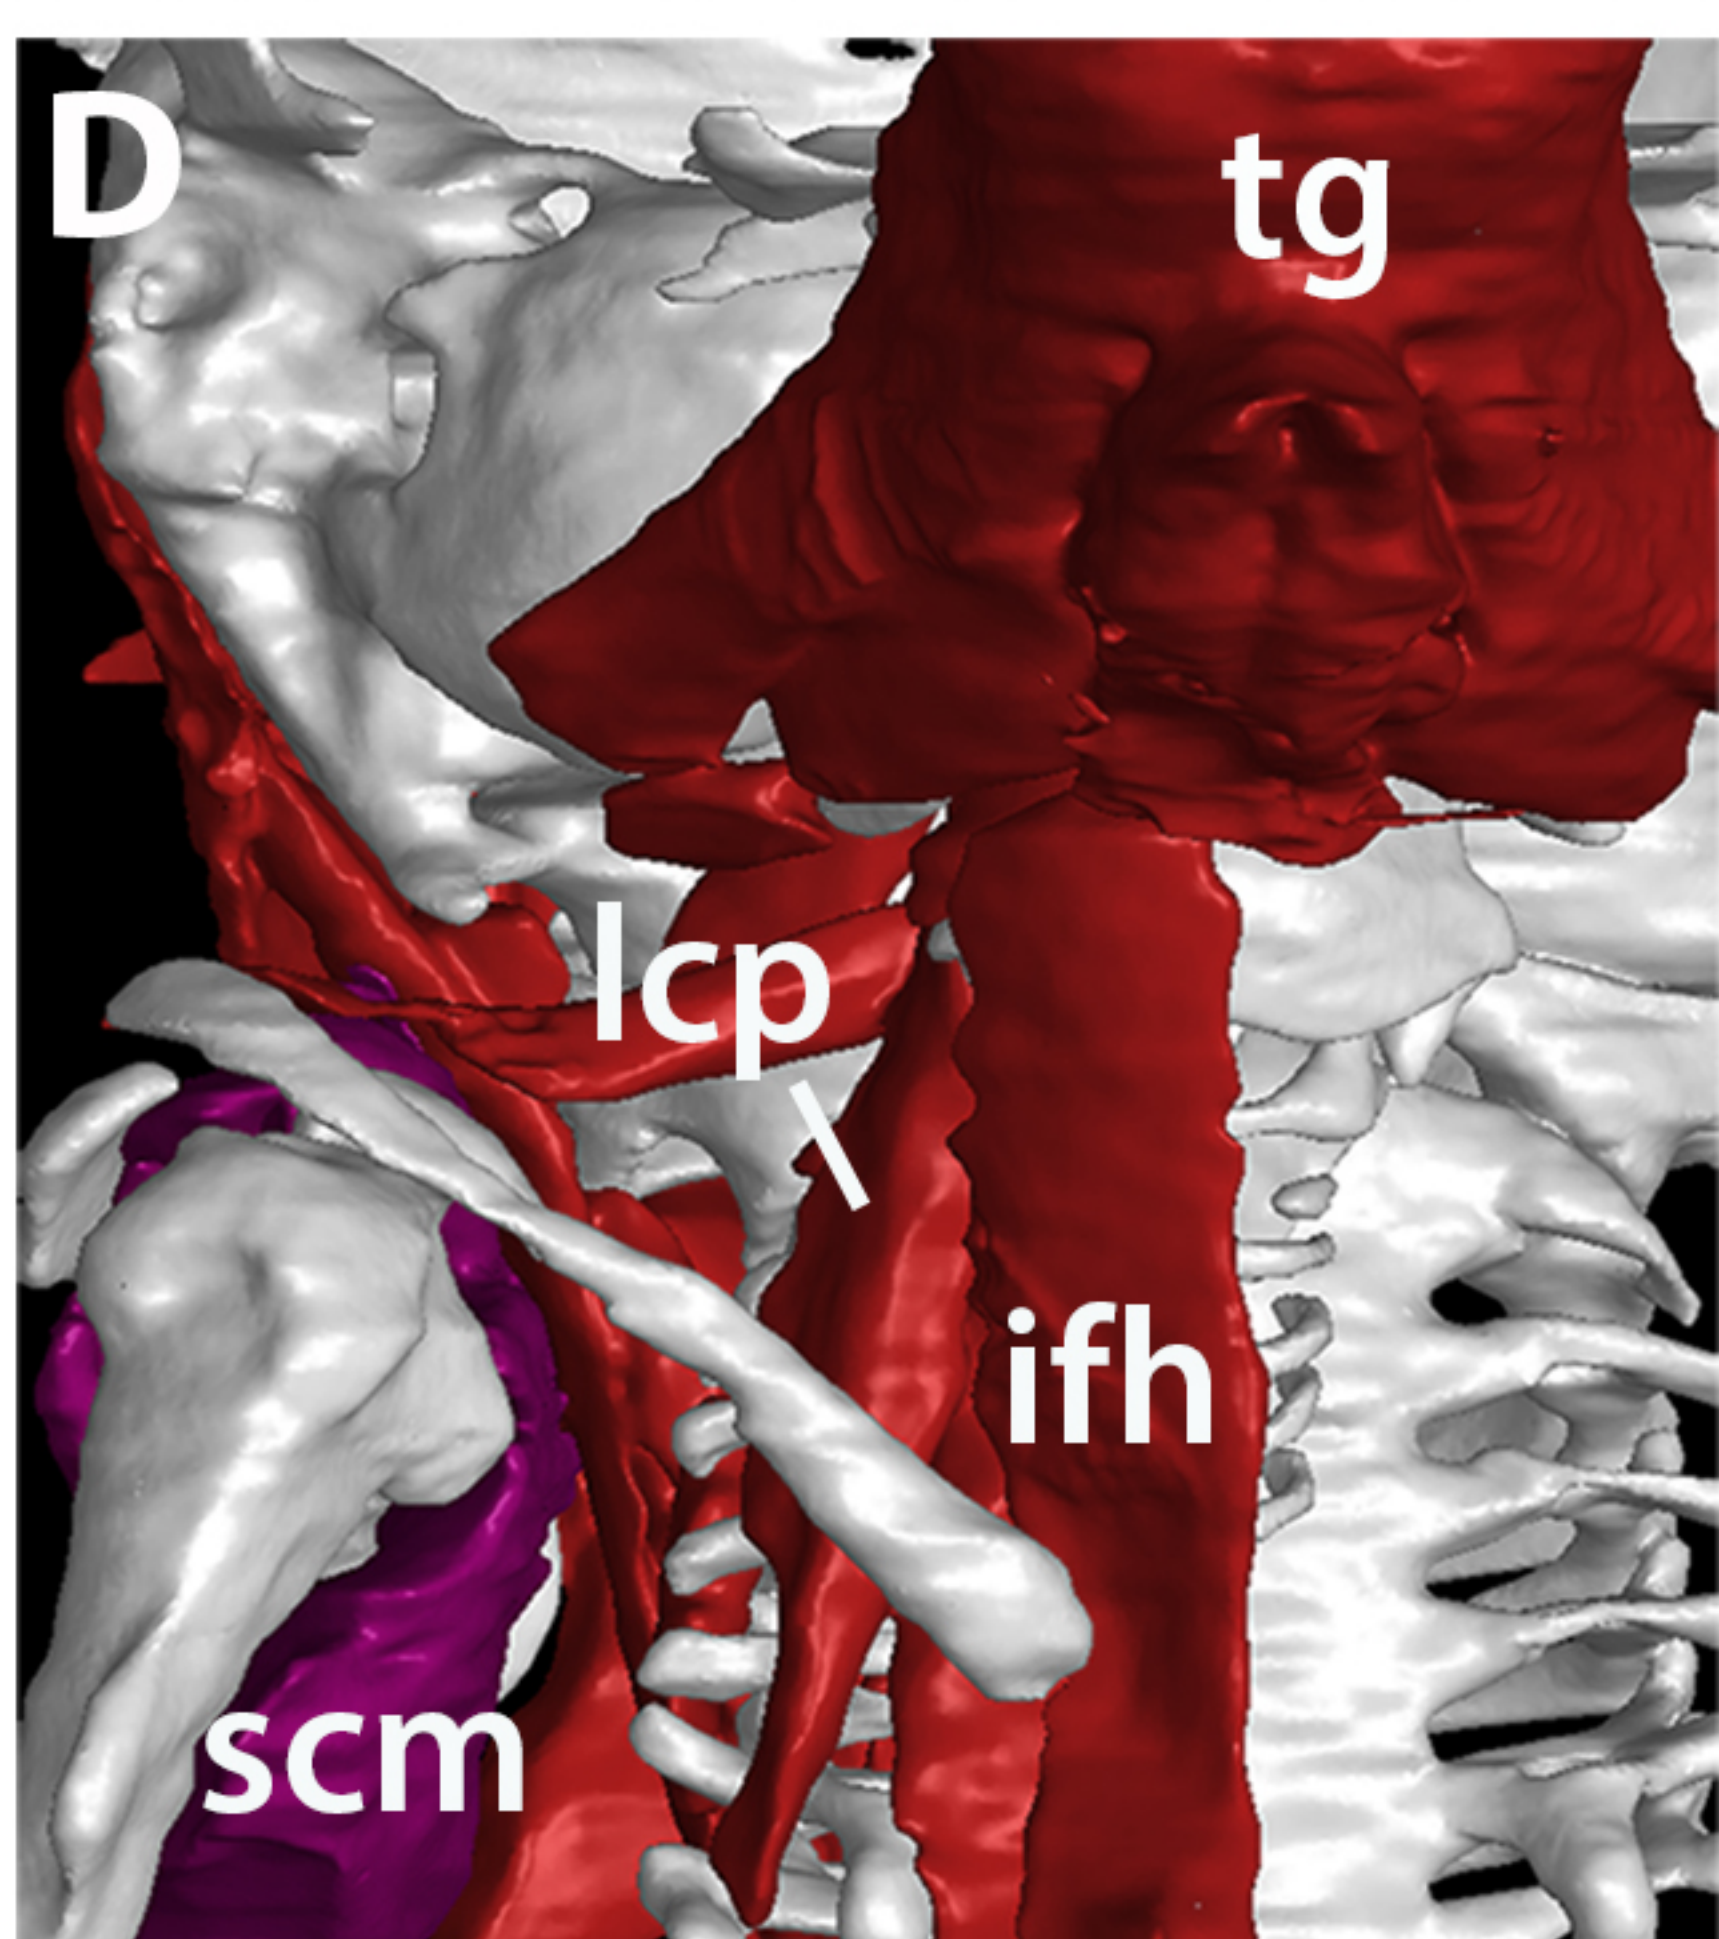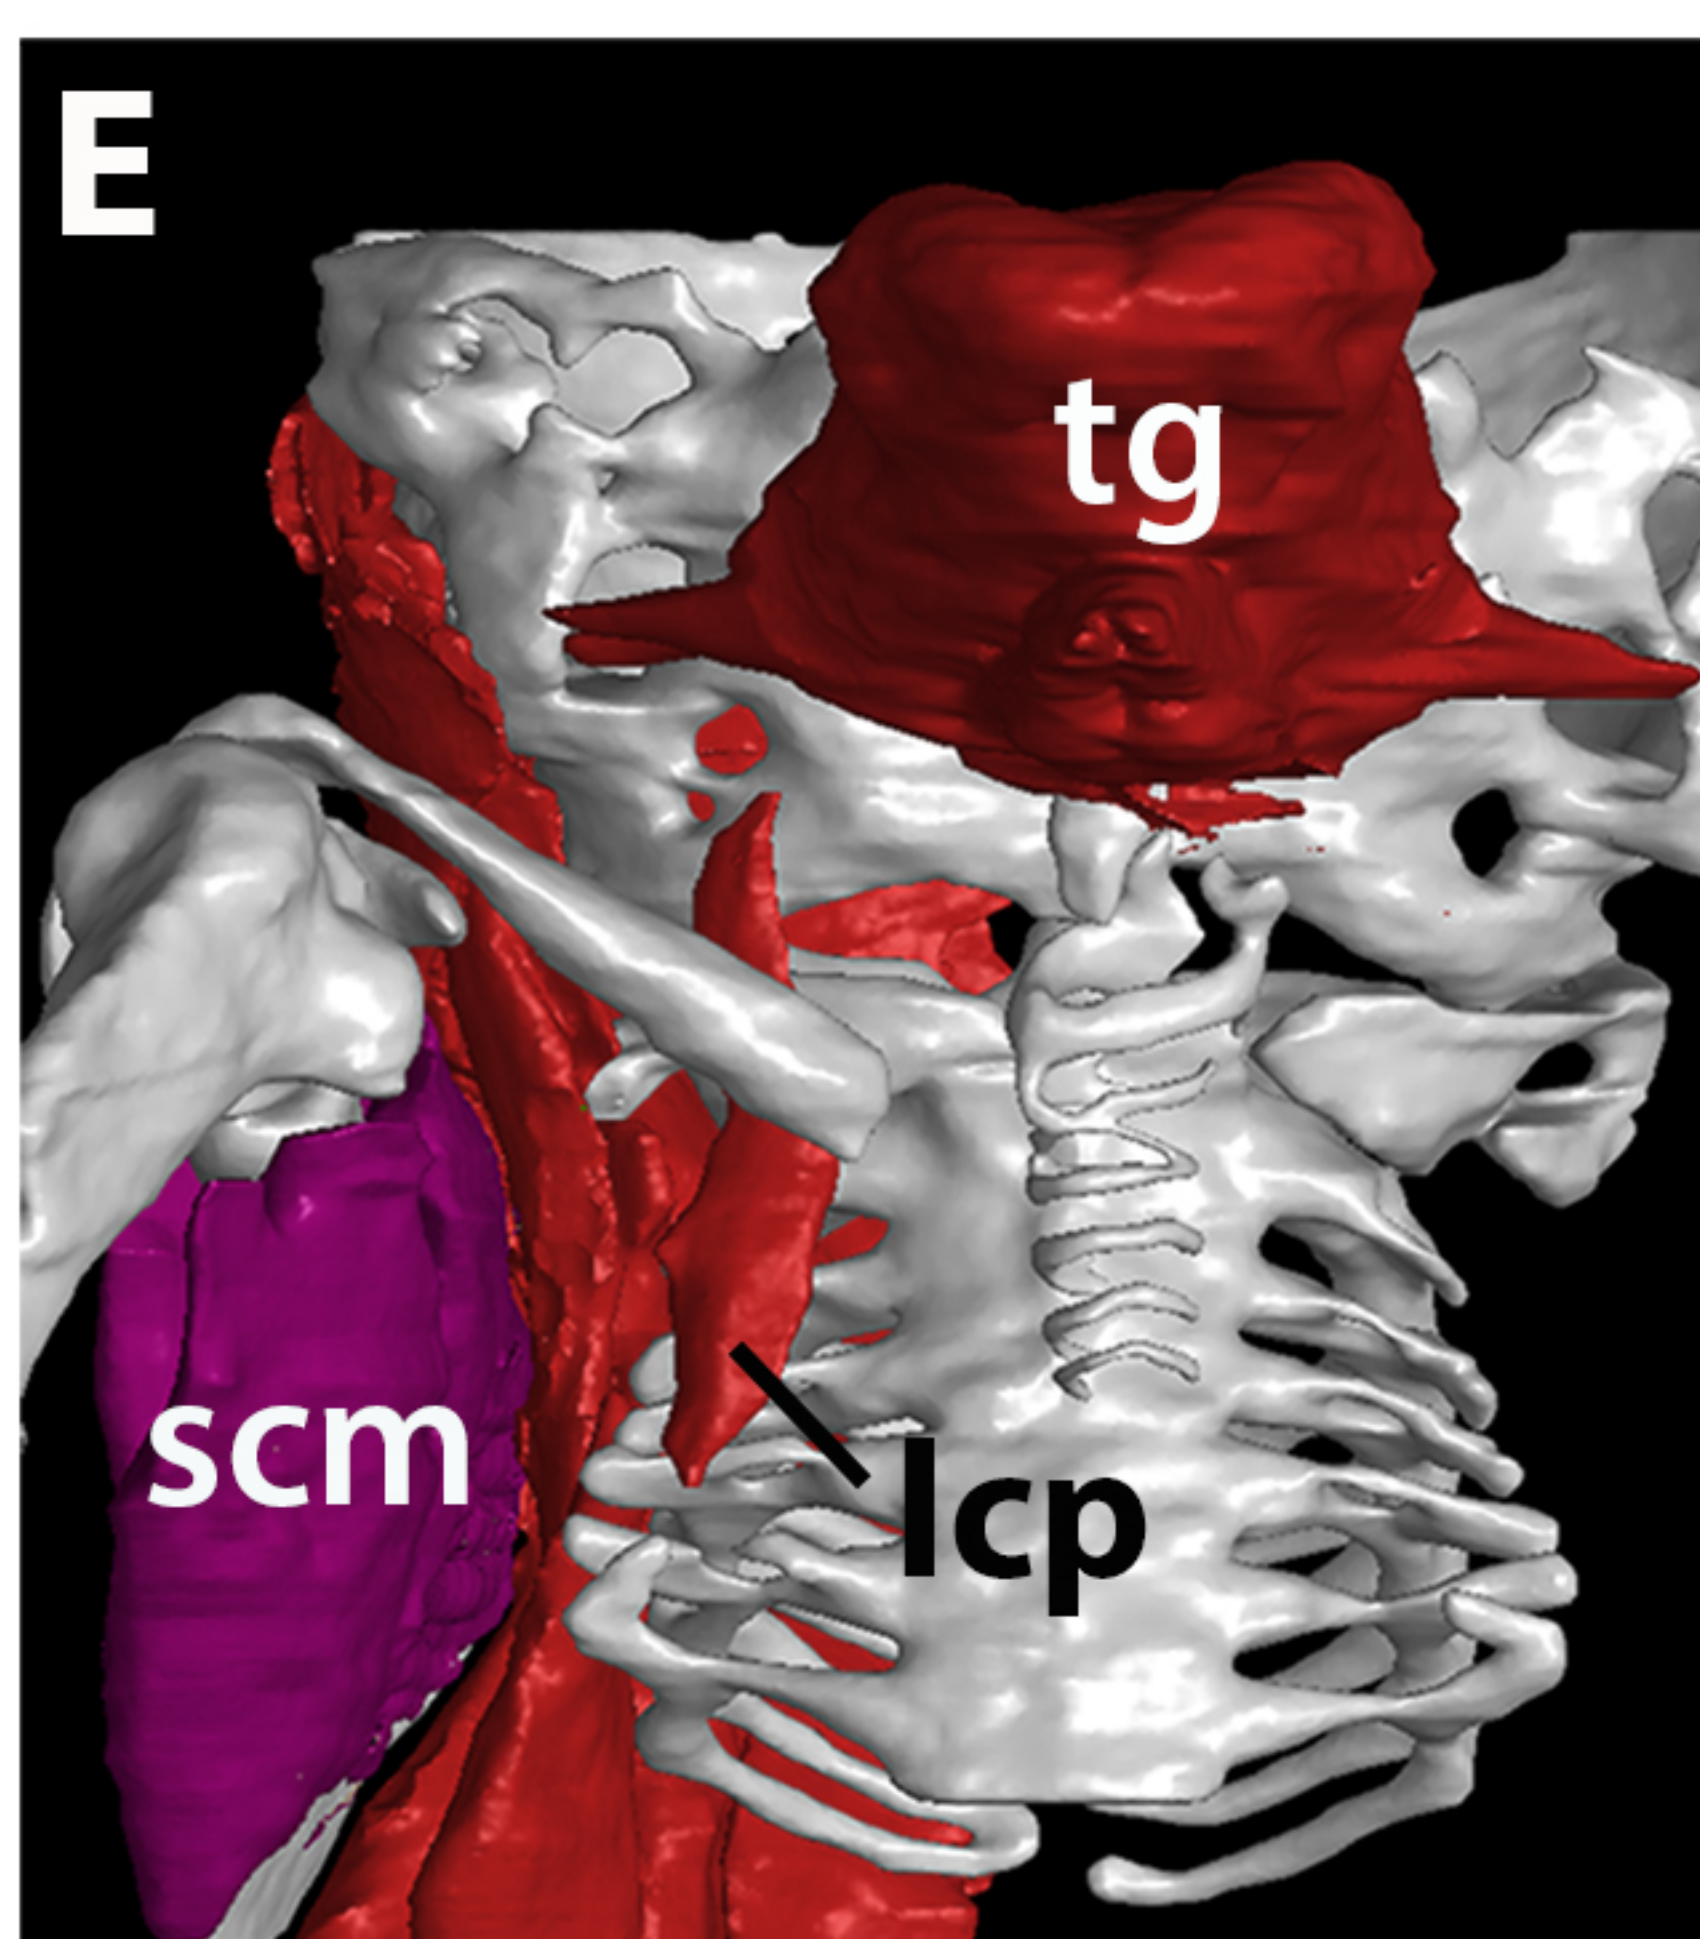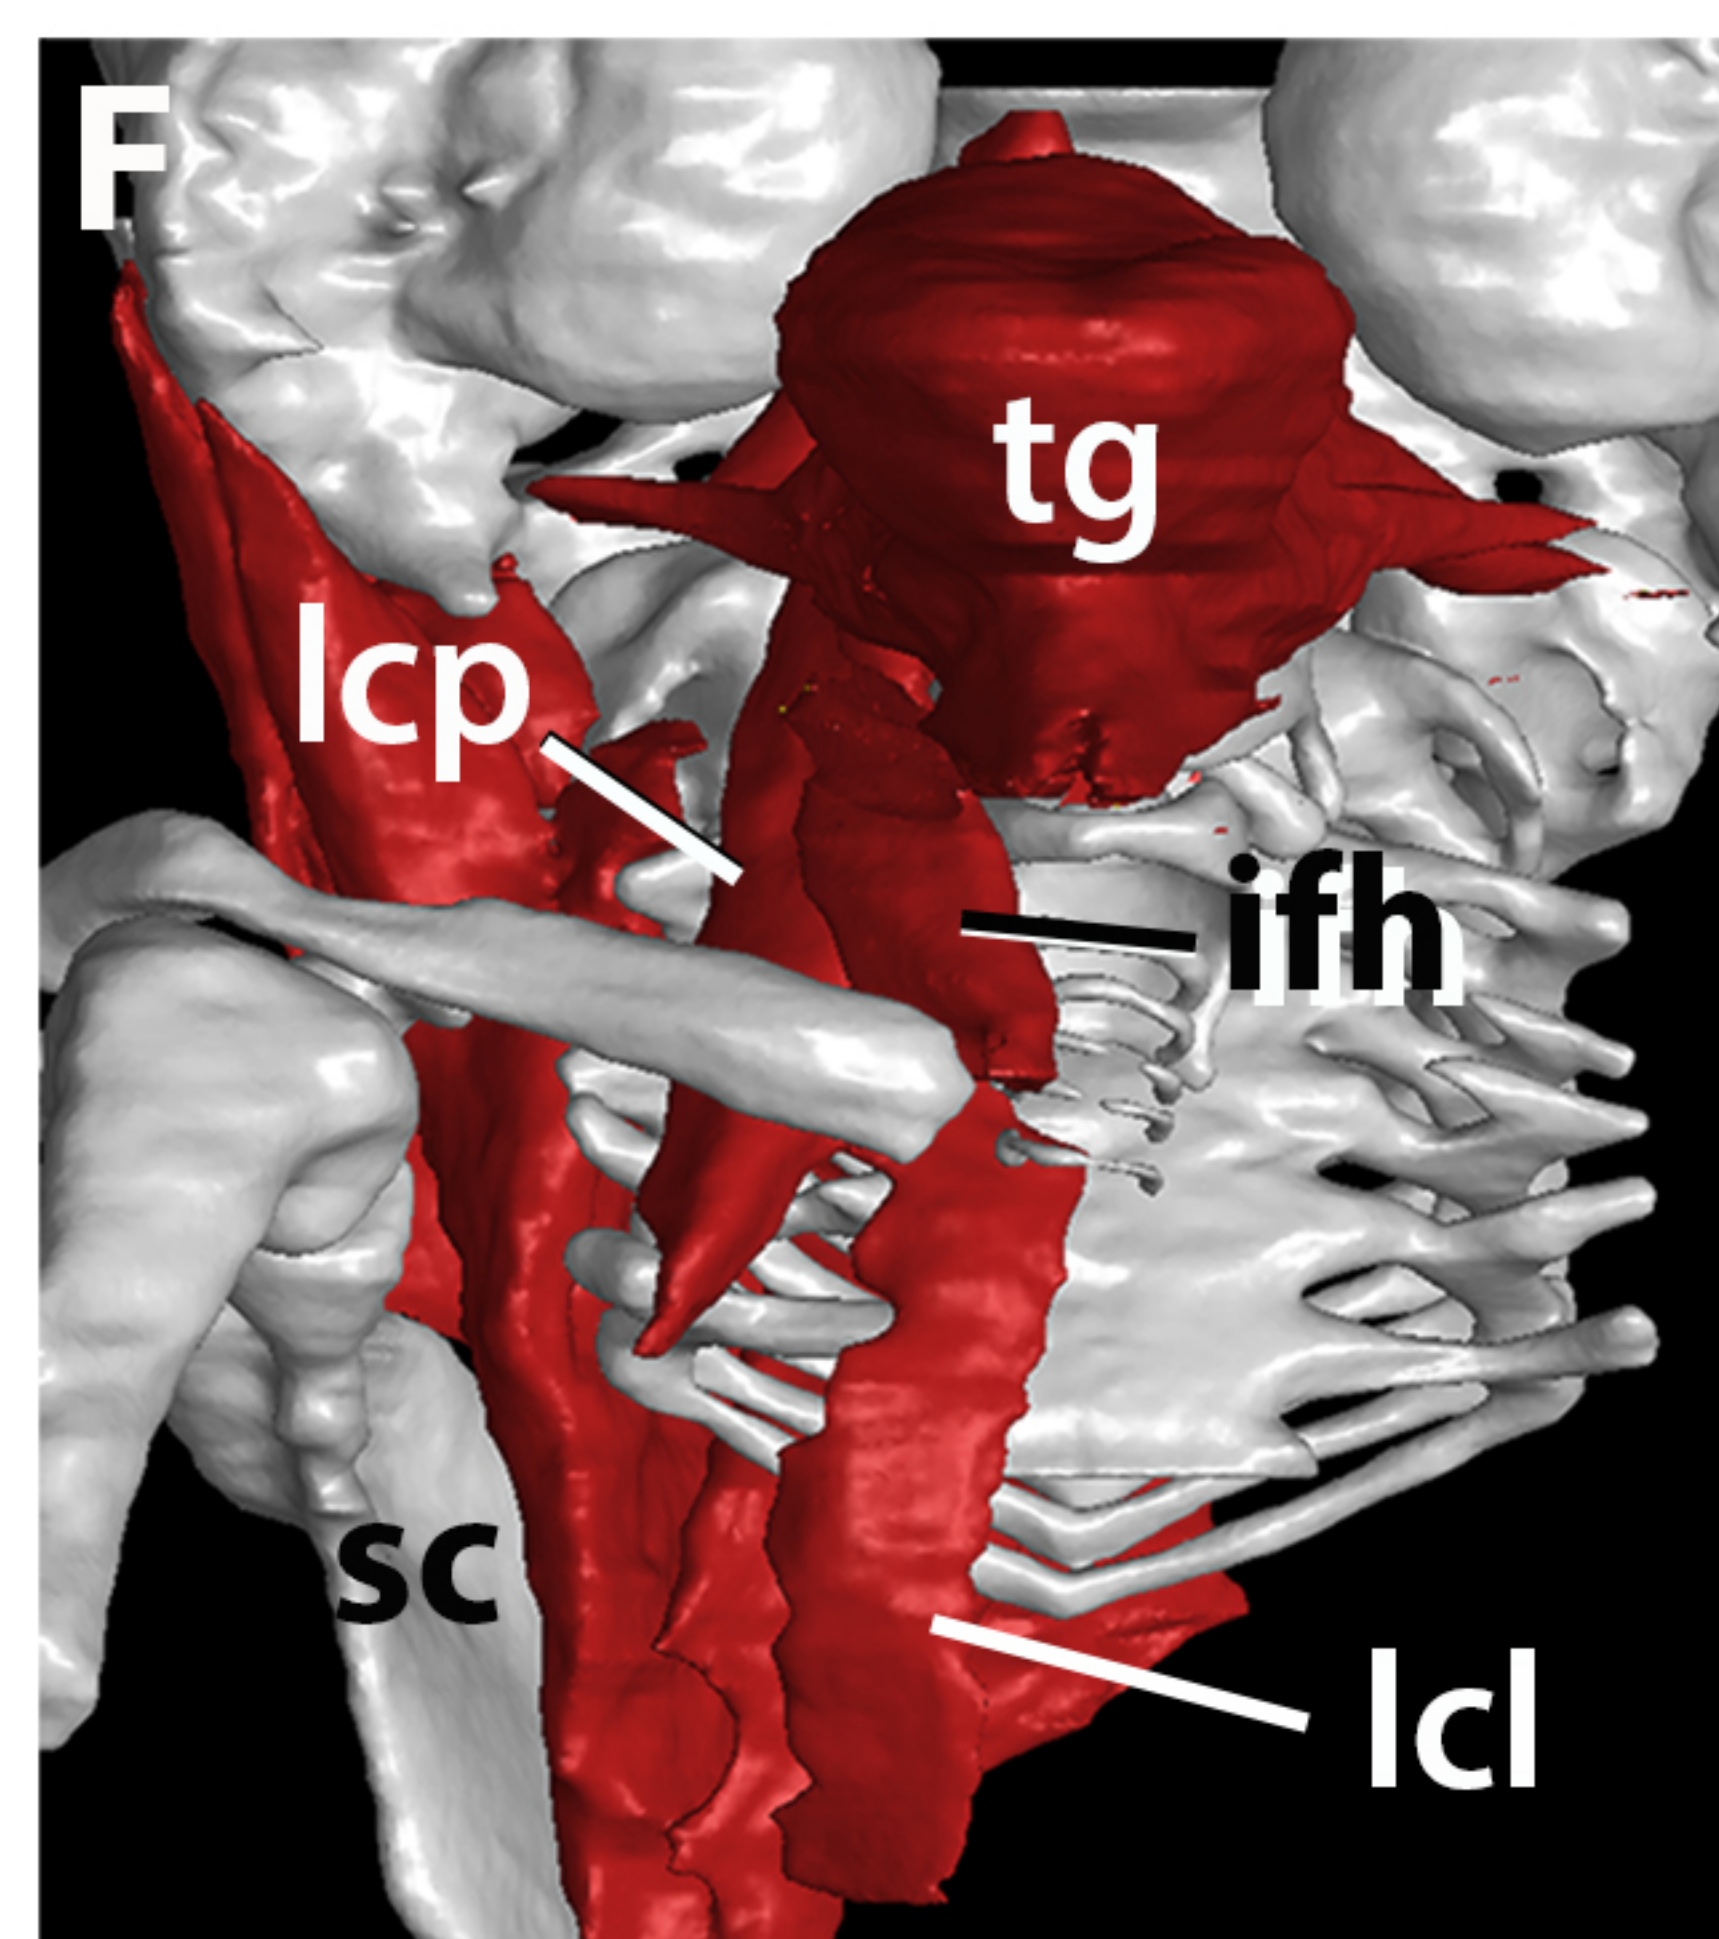

lateral

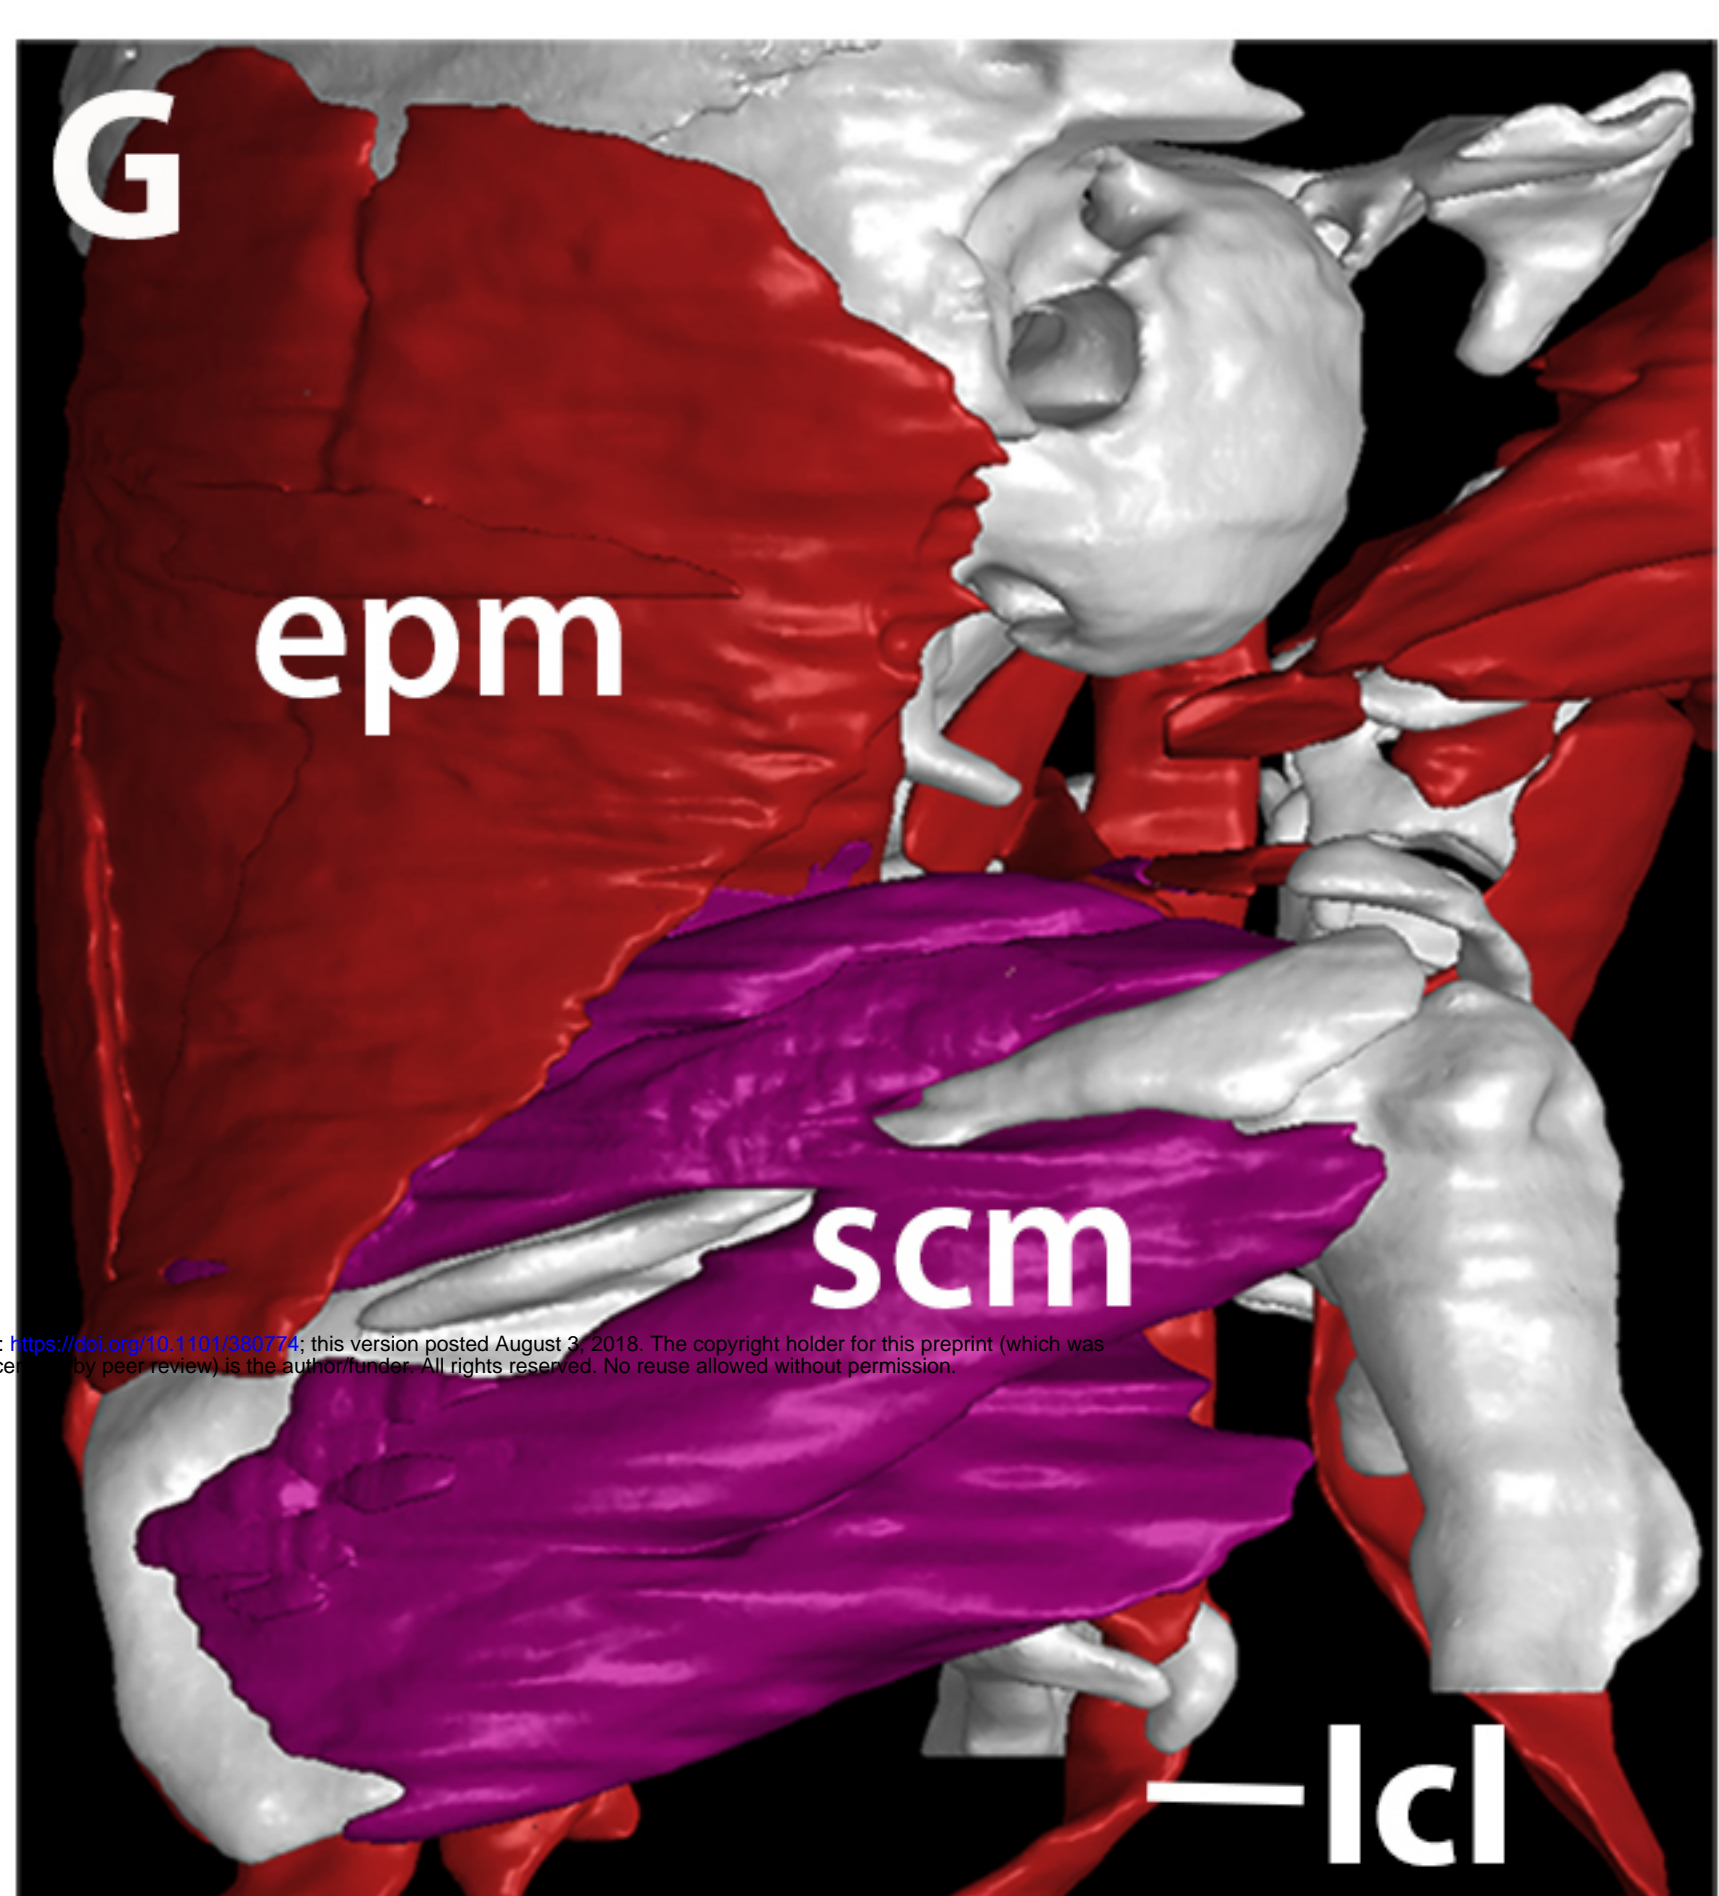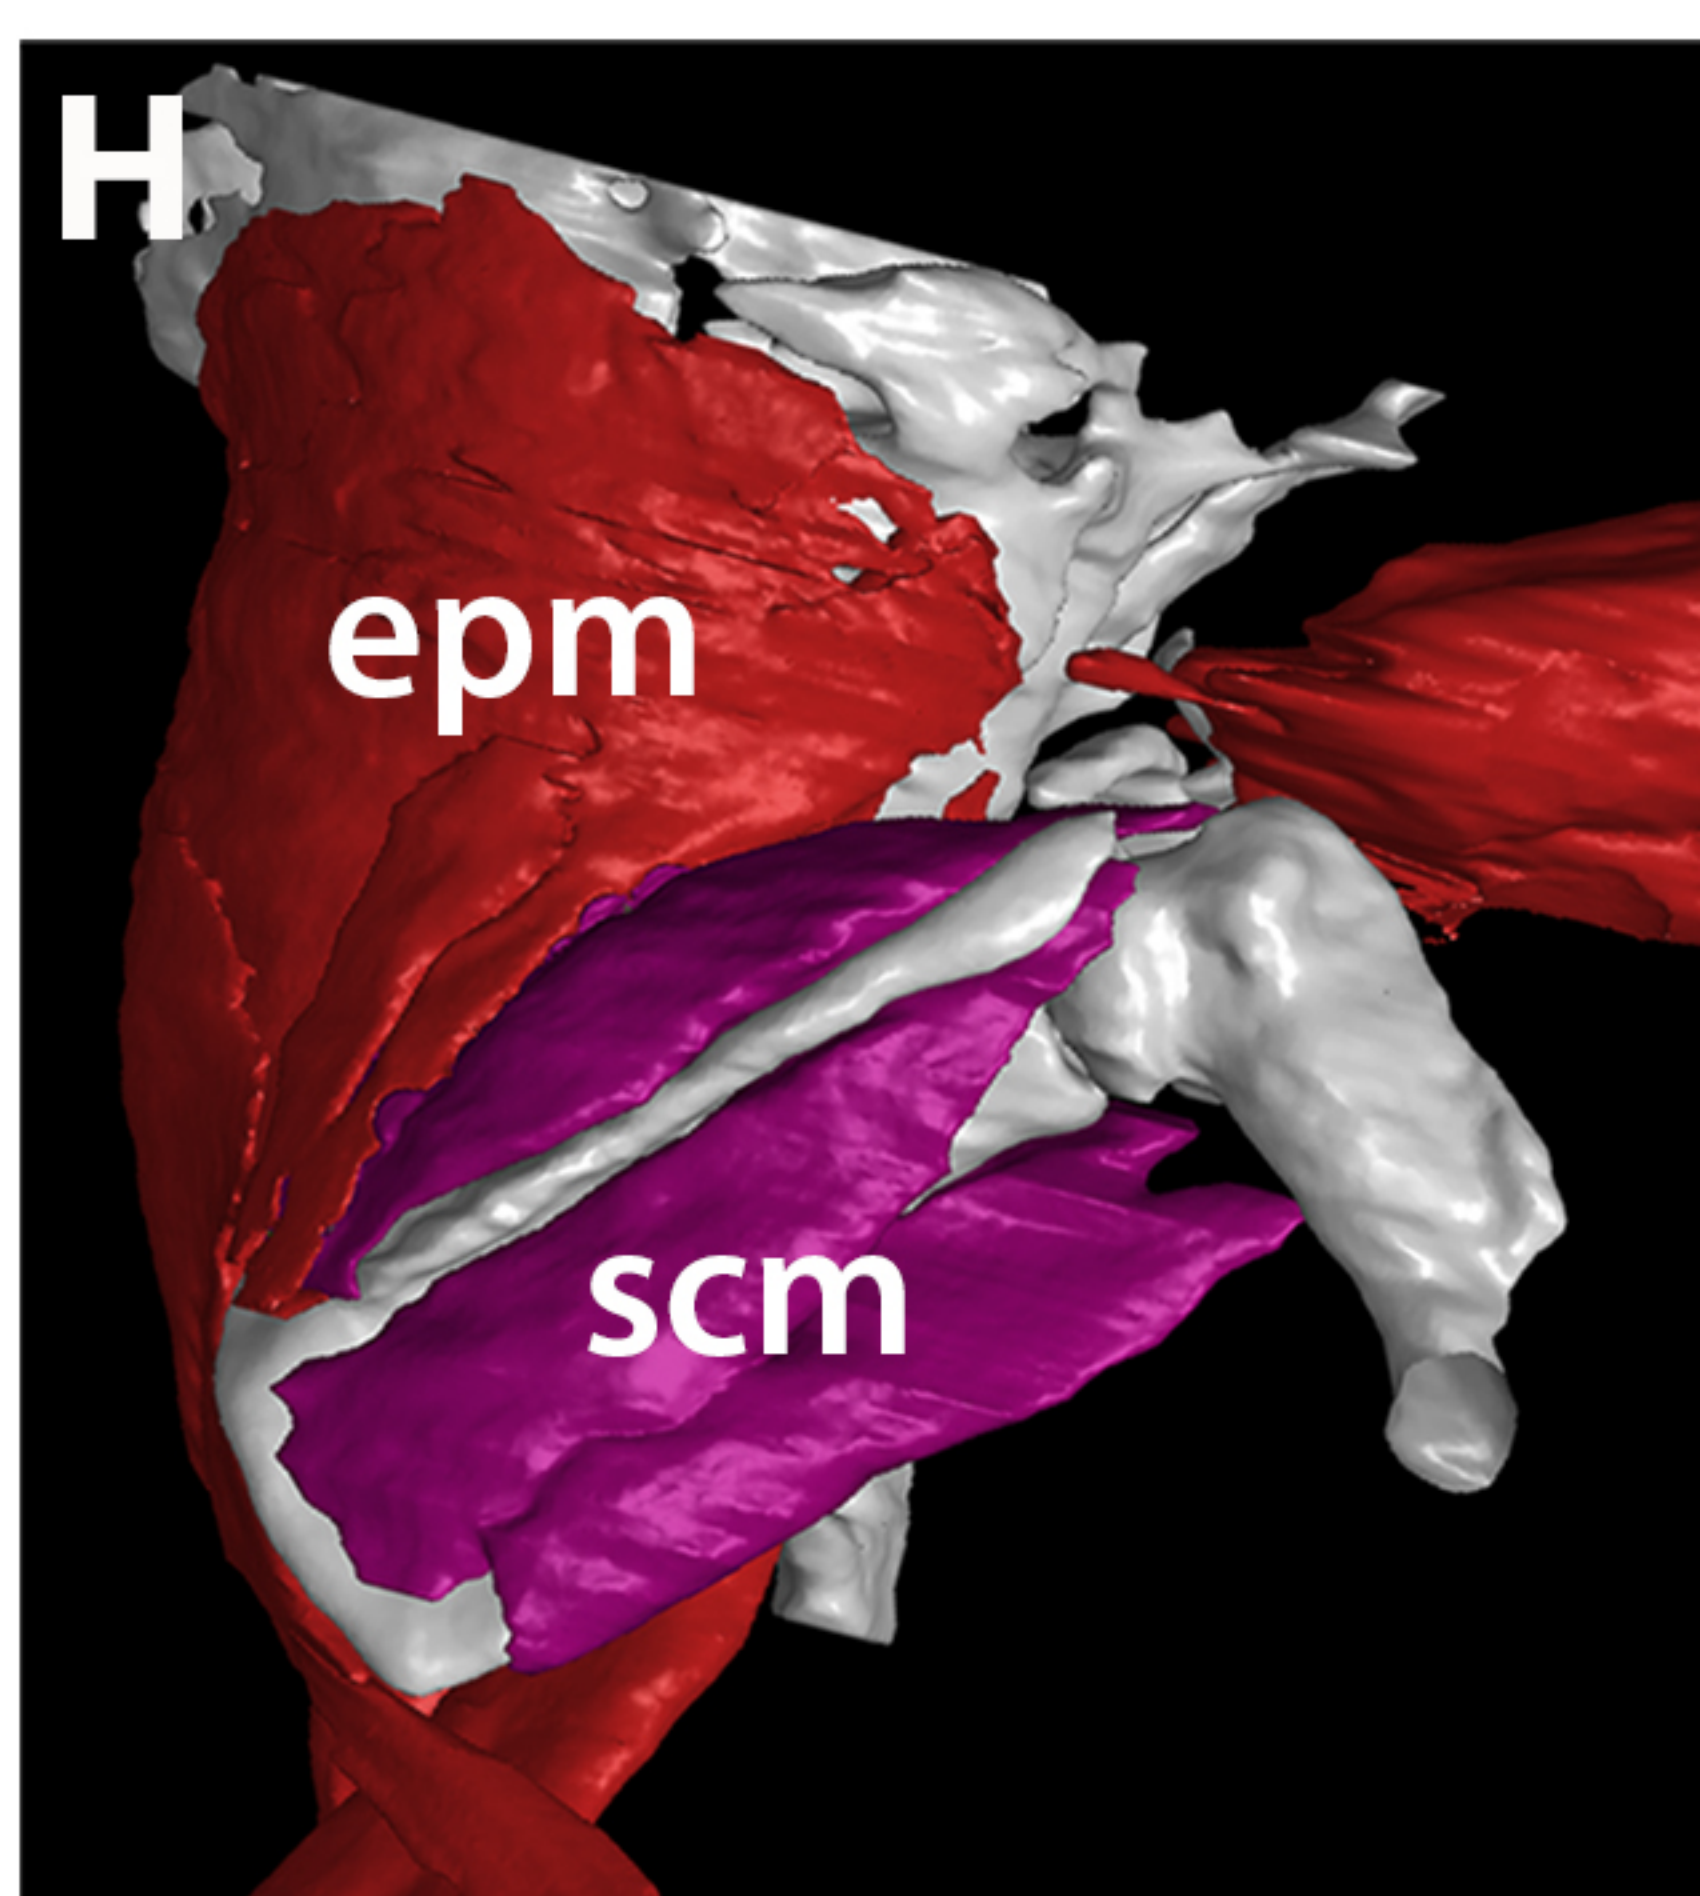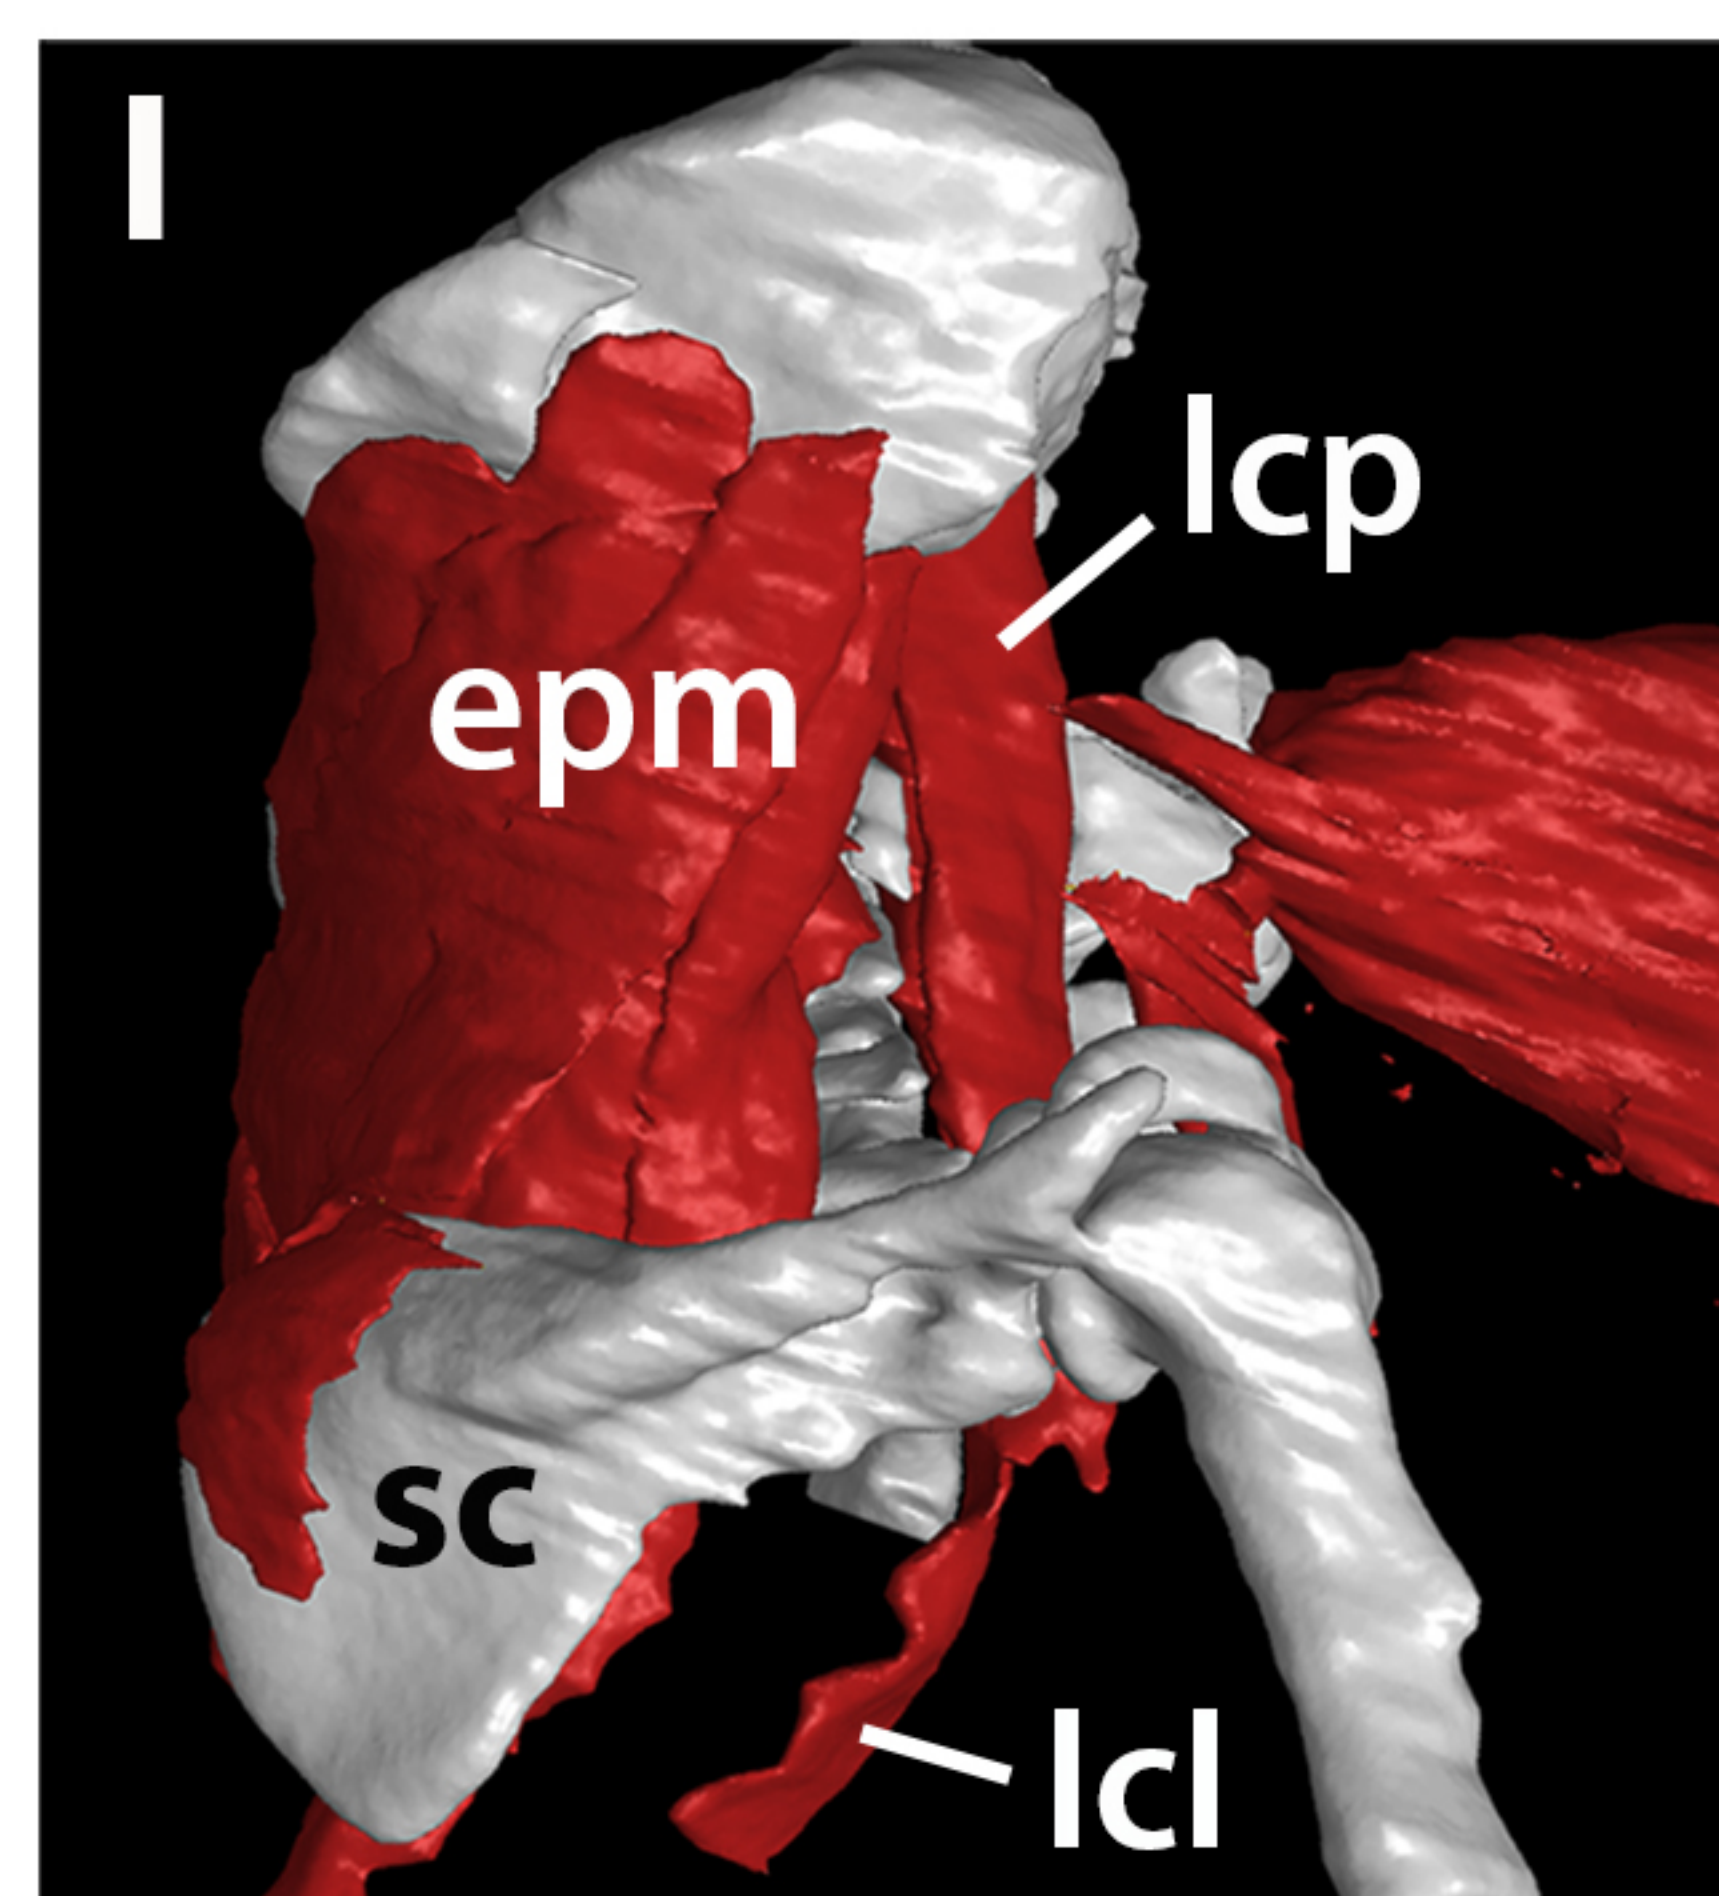

- Branchiomer program (*Mef2c-AHF/Islet1/Mesp1* lineages)
- Anterior-most somitic program (*Mesp1/Pax3* lineages)
- More posterior somitic program (*Pax3* lineage)
- Skeletal components

**Figure 6**

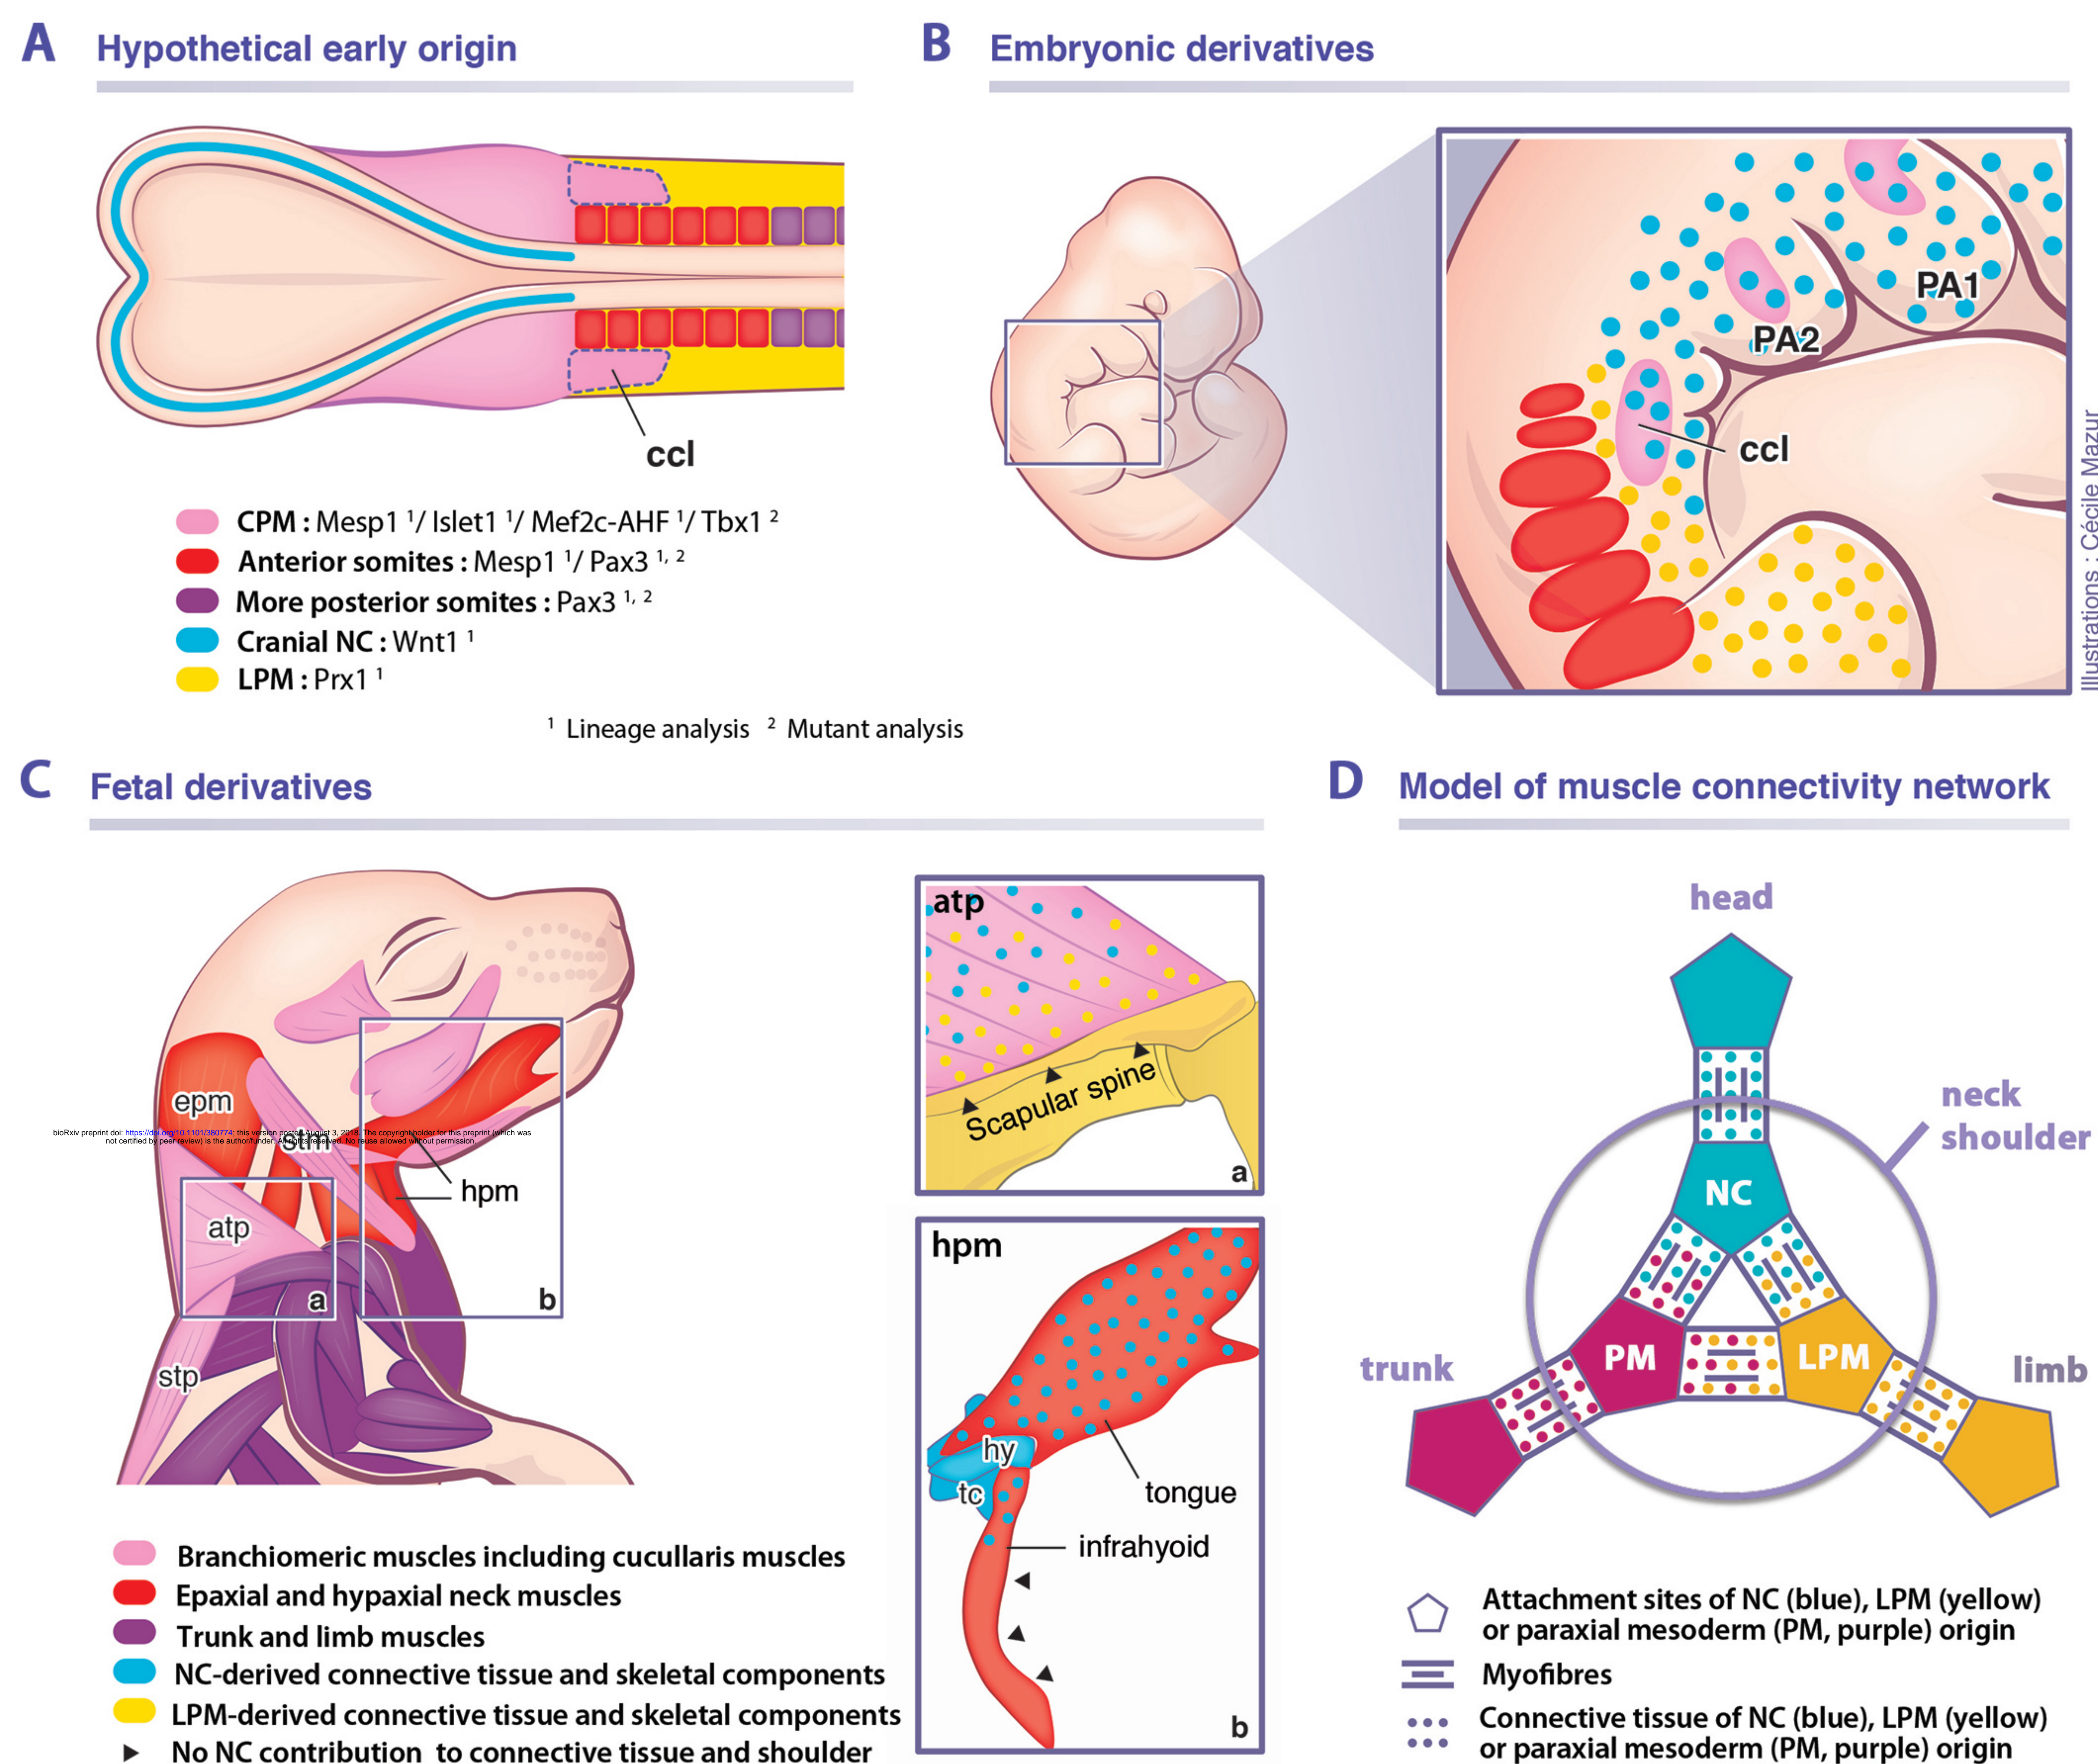

**Figure 7**
